# Supplementary material for: Pd-Catalyzed C(sp2)–H aminocarbonylation using the Langlois reagent as a carbonyl source
Source: Royal Society of Chemistry journal article supplement (doi:10.1039/c8ob01421c), 2018-01-01

# The *N,S*-Bidentate Ligand Assisted Pd-Catalyzed C(sp<sup>2</sup>)-H Carbonylation using Langlois Reagent as CO Source

Xiao-Fang Li, Lin-Feng Shi, Xing-Guo Zhang,\* Xiao-Hong Zhang\*

College of chemical and materials engineering, Wenzhou University, Wenzhou 325035, China

E-Mail: [zxcg@wzu.edu.cn](mailto:zxcg@wzu.edu.cn); [kamenzxh@wzu.edu.cn](mailto:kamenzxh@wzu.edu.cn)

## Supporting Information

### List of Contents

|                                                                                                    |         |
|----------------------------------------------------------------------------------------------------|---------|
| 1. General Information-----                                                                        | S2      |
| 2. General Procedure for the Synthesis of isoindoline-1,3-diones <b>2a-2u</b> , <b>4a-4h</b> ----- |         |
| -----                                                                                              | S2-S3   |
| 3. Optimization of the Reaction Conditions-----                                                    | S3-S4   |
| 4. The hydrolysis of compound <b>2a</b> -----                                                      | S4      |
| 5. Data for All Compounds-----                                                                     | S5-S14  |
| 6. NMR Spectra for All Compounds-----                                                              | S15-    |
| S44                                                                                                |         |
| 7. X-ray crystal structure of compound <b>2a</b> -----                                             | S45     |
| 8. Data for Control Experiments-----                                                               | S45-S47 |

## 1. General Information.

Chemicals were either purchased or purified by standard techniques.  $^1\text{H}$  NMR and  $^{13}\text{C}$  NMR spectra were measured on a 500 MHz spectrometer ( $^1\text{H}$ : 500 MHz,  $^{13}\text{C}$ : 125 MHz), using  $\text{CDCl}_3$  as the solvent with tetramethylsilane (TMS) as an internal standard at 120 °C temperature. Chemical shifts are given in  $\delta$  relative to TMS, the coupling constants  $J$  are given in Hz. High resolution mass spectra were recorded on an ESI-Q-TOF mass spectrometry. All reactions under air atmosphere were conducted using standard Schlenk techniques. Melting points were measured on X4 melting point apparatus and uncorrected. Column chromatography was performed using EM Silica gel 60 (300-400 mesh).

## 2. General Procedure for the Synthesis of isoindoline-1,3-diones **2a-2u**, **4a-4h**

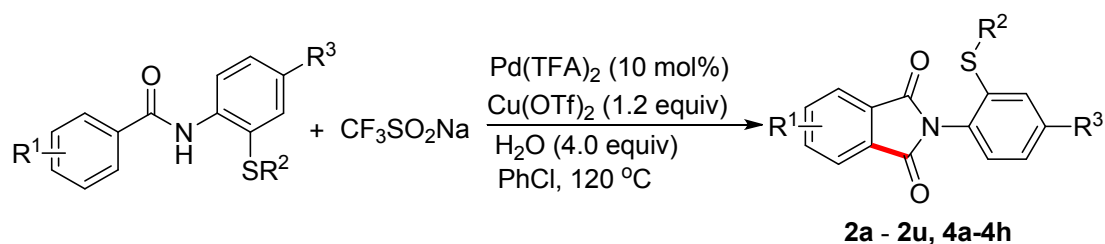

To a flame-dried Schlenk tube with a magnetic stirring bar was charged with **1** (0.2 mmol),  $\text{CF}_3\text{SO}_2\text{Na}$  (0.54 mmol),  $\text{Pd}(\text{TFA})_2$  (13.3 mg, 0.4 mmol),  $\text{H}_2\text{O}$  (4.0 equiv) in dry  $\text{PhCl}$  (2 mL) under air atmosphere. The reaction mixture was stirred at 120 °C until complete consumption of starting material as detected by TLC or GC-MS analysis. After the reaction was finished, the mixture was poured into ethyl acetate and evaporated under vacuum. The residue was purified by flash column chromatography (petroleum ether/ethyl acetate) to afford the desired products **2a-2u**, **4a-4h**.

### 3. S-Table 1. Optimization of the Reaction Conditions <sup>a,b</sup>

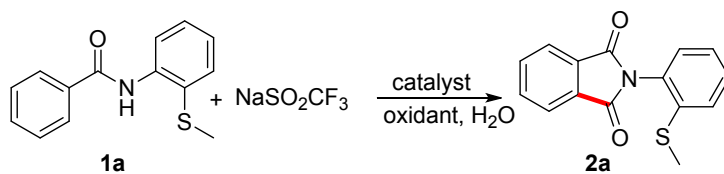

| Entry           | CF <sub>3</sub> SO <sub>2</sub> Na (equiv) | Catalyst                              | Oxidant (equiv)                         | Solvent | Yield (%) |
|-----------------|--------------------------------------------|---------------------------------------|-----------------------------------------|---------|-----------|
| 1               | 2.0                                        | Pd(OAc) <sub>2</sub>                  | Cu(OTf) <sub>2</sub> (1.0)              | Dioxane | 5         |
| 2               | 2.0                                        | Pd(OAc) <sub>2</sub>                  | Cu(OTf) <sub>2</sub> (1.0)              | DMSO    | 0         |
| 3               | 2.0                                        | Pd(OAc) <sub>2</sub>                  | Cu(OTf) <sub>2</sub> (1.0)              | DCE     | 18        |
| 4               | 2.0                                        | Pd(OAc) <sub>2</sub>                  | Cu(OTf) <sub>2</sub> (1.0)              | DMF     | NR        |
| 5               | 2.0                                        | Pd(OAc) <sub>2</sub>                  | Cu(OTf) <sub>2</sub> (1.0)              | AcOH    | 6%        |
| 6               | 2.0                                        | Pd(OAc) <sub>2</sub>                  | Cu(OTf) <sub>2</sub> (1.0)              | THF     | NR        |
| 7               | 2.0                                        | Pd(OAc) <sub>2</sub>                  | Cu(OTf) <sub>2</sub> (1.0)              | PhCl    | 21        |
| 8               | 2.0                                        | PdCl <sub>2</sub>                     | Cu(OTf) <sub>2</sub> (1.0)              | PhCl    | 8         |
| 9               | 2.0                                        | Pd(MeCN) <sub>2</sub> Cl <sub>2</sub> | Cu(OTf) <sub>2</sub> (1.0)              | PhCl    | 32        |
| 10              | 2.0                                        | Pd(TFA) <sub>2</sub>                  | Cu(OTf) <sub>2</sub> (1.0)              | PhCl    | 50        |
| 11              | 2.0                                        | PdBr <sub>2</sub>                     | Cu(OTf) <sub>2</sub> (1.0)              | PhCl    | 20        |
| 12              | 2.0                                        | Ni(dppp) <sub>2</sub> Cl <sub>2</sub> | Cu(OTf) <sub>2</sub> (1.0)              | PhCl    | NR        |
| 13              | 2.0                                        | Co(acac) <sub>2</sub>                 | Cu(OTf) <sub>2</sub> (1.0)              | PhCl    | NR        |
| 14              | 2.0                                        | Pd(TFA) <sub>2</sub>                  | CuCl <sub>2</sub> (1.0)                 | PhCl    | 12        |
| 15              | 2.0                                        | Pd(TFA) <sub>2</sub>                  | Cu(BF <sub>4</sub> ) <sub>2</sub> (1.0) | PhCl    | 33        |
| 16              | 2.0                                        | Pd(TFA) <sub>2</sub>                  | Cu(NO <sub>3</sub> ) <sub>2</sub> (1.0) | PhCl    | 6         |
| 17              | 2.7                                        | Pd(TFA) <sub>2</sub>                  | AgOAc (1.2)                             | PhCl    | NR        |
| 18              | 2.7                                        | Pd(TFA) <sub>2</sub>                  | Ag <sub>2</sub> CO <sub>3</sub> (1.2)   | PhCl    | NR        |
| 19              | 2.0                                        | Pd(TFA) <sub>2</sub>                  | Cu(OTf) <sub>2</sub> (1.2)              | PhCl    | 55        |
| 20              | 2.5                                        | Pd(TFA) <sub>2</sub>                  | Cu(OTf) <sub>2</sub> (1.2)              | PhCl    | 66        |
| 21              | 2.7                                        | Pd(TFA) <sub>2</sub>                  | Cu(OTf) <sub>2</sub> (1.2)              | PhCl    | 77        |
| 22              | 3.0                                        | Pd(TFA) <sub>2</sub>                  | Cu(OTf) <sub>2</sub> (1.2)              | PhCl    | 75        |
| 23 <sup>c</sup> | 2.7                                        | Pd(TFA) <sub>2</sub>                  | Cu(OTf) <sub>2</sub> (1.2)              | PhCl    | 72        |
| 24 <sup>d</sup> | 2.7                                        | Pd(TFA) <sub>2</sub>                  | Cu(OTf) <sub>2</sub> (1.2)              | PhCl    | 56        |

|                 |     |                      |                            |      |    |
|-----------------|-----|----------------------|----------------------------|------|----|
| 25 <sup>e</sup> | 2.7 | Pd(TFA) <sub>2</sub> | Cu(OTf) <sub>2</sub> (1.2) | PhCl | 71 |
| 26 <sup>f</sup> | 2.7 | Pd(TFA) <sub>2</sub> | Cu(OTf) <sub>2</sub> (1.2) | PhCl | 60 |
| 27 <sup>g</sup> | 2.7 | Pd(TFA) <sub>2</sub> | Cu(OTf) <sub>2</sub> (1.2) | PhCl | 54 |

<sup>a</sup> Reaction conditions: **1a** (0.2 mmol), CF<sub>3</sub>SO<sub>2</sub>Na (2.0-3.0 equiv), Pd catalyst (10 mol %), oxidant (1.0 equiv), H<sub>2</sub>O (4.0 equiv) in solvent (2 mL) at 120°C under air atmosphere for 24 h; <sup>b</sup> Isolated yield; <sup>c</sup> 130 °C; <sup>d</sup> for 18h; <sup>e</sup> N<sub>2</sub> atmosphere; <sup>f</sup> H<sub>2</sub>O (6.0 equiv); <sup>g</sup> H<sub>2</sub>O (2.0 equiv).

#### 4. The hydrolysis of compound **2a**

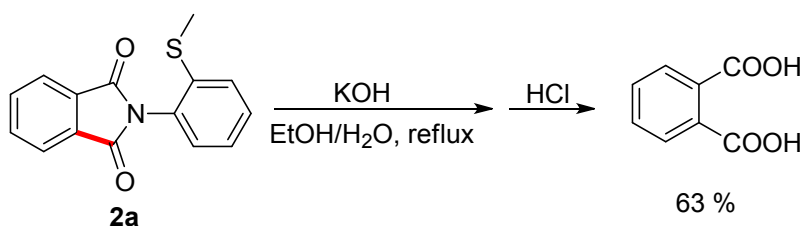

**2a** (26.9 mg, 0.1 mmol) was refluxed with KOH (33.6 mg, 0.6 mmol) in 2 mL EtOH/H<sub>2</sub>O (1:3) for 6 h. After the reaction was finished, dilute hydrochloric acid (1.2 N) was added in ice-bath and precipitated white solid was isolated by filtration, washed with water and dried. The phthalic acid was obtained. Yield (10.5 mg, 63 % yield).

## 5. Data for All Compounds.

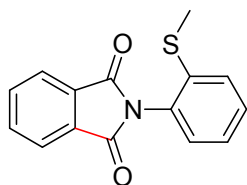

*2-(2-(methylthio)phenyl)isoindoline-1,3-dione (2a)*: White solid (41.4 mg, 77% yield). m.p. 158-160 °C.  $^1\text{H}$  NMR (500 MHz,  $\text{CDCl}_3$ )  $\delta$  7.97-7.96 (m, 2H), 7.81-7.79 (m, 2H), 7.48-7.42 (m, 2H), 7.33-7.30 (m, 1H), 7.26-7.24 (m, 1H), 2.42 (s, 3H).  $^{13}\text{C}$  NMR (125 MHz,  $\text{CDCl}_3$ )  $\delta$  167.2, 138.6, 134.5, 132.1, 130.28, 130.25, 129.7, 128.1, 126.3, 124.0, 16.4. HRMS (ESI) Calcd for  $\text{C}_{15}\text{H}_{11}\text{NO}_2\text{SNa}^+$  ( $[\text{M} + \text{Na}]^+$ ) 292.0403, Found: 292.0413.

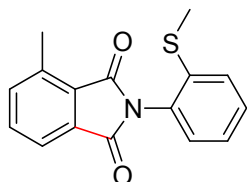

*4-methyl-2-(2-(methylthio)phenyl)isoindoline-1,3-dione (2b)*: Yellow solid (31.1 mg, 55% yield). m.p. 129-131 °C.  $^1\text{H}$  NMR (500 MHz,  $\text{CDCl}_3$ )  $\delta$  7.78 (d,  $J = 7.0$  Hz, 1H), 7.65-7.62 (m, 1H), 7.53 (d,  $J = 7.5$  Hz, 1H), 7.47-7.41 (m, 2H), 7.31-7.28 (m, 1H), 7.24 (d,  $J = 7.5$  Hz, 1H), 2.74 (s, 3H), 2.42 (s, 3H).  $^{13}\text{C}$  NMR (125 MHz,  $\text{CDCl}_3$ )  $\delta$  168.0, 167.2, 138.7, 138.6, 136.8, 133.9, 132.5, 130.3, 130.1, 129.7, 128.8, 127.8, 126.2, 121.6, 17.8, 16.2. HRMS (ESI) Calcd for  $\text{C}_{16}\text{H}_{13}\text{NO}_2\text{SNa}^+$  ( $[\text{M} + \text{Na}]^+$ ) 306.0559, Found: 306.0561.

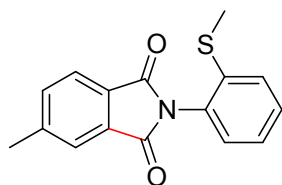

*5-methyl-2-(2-(methylthio)phenyl)isoindoline-1,3-dione (2c)*: Yellow solid (40.8 mg, 72% yield). m.p. 146-148 °C.  $^1\text{H}$  NMR (500 MHz,  $\text{CDCl}_3$ )  $\delta$  7.84 (d,  $J = 7.5$  Hz, 1H), 7.77 (s, 1H), 7.58 (d,  $J = 8.0$  Hz, 1H), 7.47-7.41 (m, 2H), 7.32-7.29 (m, 1H), 7.24 (d,  $J = 8.0$  Hz, 1H), 2.55 (s, 3H), 2.42 (s, 3H).  $^{13}\text{C}$  NMR (125 MHz,  $\text{CDCl}_3$ )  $\delta$  167.5, 167.3, 145.8, 138.7, 135.0, 132.5, 130.4, 130.2, 129.8, 129.6, 128.0, 126.3, 124.5, 123.9, 22.2, 16.4. HRMS (ESI) Calcd for  $\text{C}_{16}\text{H}_{13}\text{NO}_2\text{SNa}^+$  ( $[\text{M} + \text{Na}]^+$ ) 306.0559, Found: 306.0562.

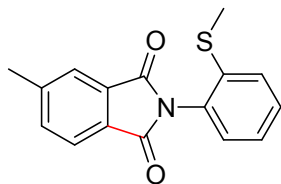

*5-methyl-2-(2-(methylthio)phenyl)isoindoline-1,3-dione (2d)*: Yellow solid (36.3 mg, 64% yield). m.p. 146-148 °C. <sup>1</sup>H NMR (500 MHz, CDCl<sub>3</sub>) δ 7.84 (d, *J* = 8.0 Hz, 1H), 7.76 (s, 1H), 7.58 (d, *J* = 7.5 Hz, 1H), 7.46-7.41 (m, 2H), 7.32 - 7.29 (m, 1H), 7.24 (d, *J* = 8.0 Hz, 1H), 2.54 (s, 3H), 2.41 (s, 3H). <sup>13</sup>C NMR (125 MHz, CDCl<sub>3</sub>) δ 167.4, 167.3, 145.8, 138.6, 135.0, 132.5, 130.4, 130.1, 129.7, 129.5, 128.0, 126.3, 124.5, 123.9, 22.2, 16.3. HRMS (ESI) Calcd for C<sub>16</sub>H<sub>13</sub>NO<sub>2</sub>SNa<sup>+</sup> ([M + Na]<sup>+</sup>) 306.0559, Found: 306.0557.

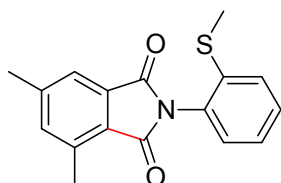

*4,6-dimethyl-2-(2-(methylthio)phenyl)isoindoline-1,3-dione (2e)*: Yellow solid (33.3 mg, 56% yield). m.p. 141-143 °C. <sup>1</sup>H NMR (500 MHz, CDCl<sub>3</sub>) δ 7.60 (s, 1H), 7.46-7.43 (m, 1H), 7.40 (d, *J* = 8.0 Hz, 1H), 7.33 (s, 1H), 7.31-7.28 (m, 1H), 7.23 (d, *J* = 7.5 Hz, 1H), 2.69 (s, 3H), 2.48 (s, 3H), 2.42 (s, 3H). <sup>13</sup>C NMR (125 MHz, CDCl<sub>3</sub>) δ 168.0, 167.5, 145.2, 138.7, 138.5, 137.3, 132.9, 130.4, 130.0, 129.8, 127.7, 126.3, 126.1, 122.3, 21.9, 17.8, 16.2. HRMS (ESI) Calcd for C<sub>17</sub>H<sub>15</sub>NO<sub>2</sub>SNa<sup>+</sup> ([M + Na]<sup>+</sup>) 320.0716, Found: 320.0711.

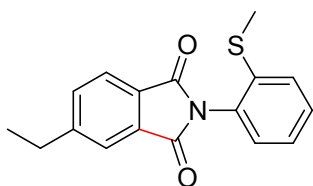

*5-ethyl-2-(2-(methylthio)phenyl)isoindoline-1,3-dione (2f)*: Yellow solid (35.5 mg, 61% yield). m.p. 141-143 °C. <sup>1</sup>H NMR (500 MHz, CDCl<sub>3</sub>) δ 7.86 (d, *J* = 7.5 Hz, 1H), 7.80 (s, 1H), 7.60 (d, *J* = 7.5 Hz, 1H), 7.47-7.41 (m, 2H), 7.32-7.29 (m, 1H), 7.24 (d, *J* = 7.5 Hz, 1H), 2.84 (q, *J* = 7.5 Hz, 2H), 2.42 (s, 3H), 1.32 (t, *J* = 7.5 Hz, 3H). <sup>13</sup>C NMR (125 MHz, CDCl<sub>3</sub>) δ 167.5, 167.3, 152.0, 138.6, 134.0, 132.6, 130.4, 130.1, 129.8, 129.7, 128.0, 126.3, 124.0, 123.3, 29.4, 16.4, 15.3. HRMS (ESI) Calcd for C<sub>17</sub>H<sub>15</sub>NO<sub>2</sub>SNa<sup>+</sup> ([M + Na]<sup>+</sup>) 320.0716, Found: 320.0729.

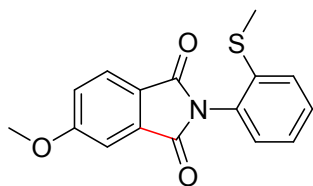

*5-methoxy-2-(2-(methylthio)phenyl)isoindoline-1,3-dione (2g)*: Yellow solid (31.1 mg, 52% yield). m.p. 164-166 °C. <sup>1</sup>H NMR (500 MHz, CDCl<sub>3</sub>) δ 7.85 (d, *J* = 8.5 Hz, 1H), 7.46-7.41 (m, 3H), 7.31-7.28 (m, 1H), 7.25-7.22 (m, 2H), 3.94 (s, 3H), 2.41 (s, 3H). <sup>13</sup>C NMR (125 MHz, CDCl<sub>3</sub>) δ 167.1, 167.0, 165.1, 138.7, 134.7, 130.5, 130.1, 129.8, 128.0, 126.3, 125.7, 124.0, 120.5, 108.4, 56.2, 16.3. HRMS (ESI) Calcd for C<sub>16</sub>H<sub>13</sub>NO<sub>3</sub>SNa<sup>+</sup> ([M + Na]<sup>+</sup>) 322.0508, Found: 322.0520.

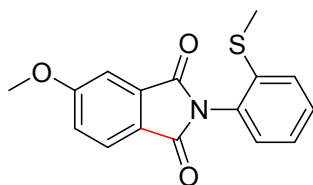

*5-methoxy-2-(2-(methylthio)phenyl)isoindoline-1,3-dione (2h)*: Yellow solid (28.7 mg, 48% yield). m.p. 164-166 °C. <sup>1</sup>H NMR (500 MHz, CDCl<sub>3</sub>) δ 7.84 (d, *J* = 8.5 Hz, 1H), 7.46-7.40 (m, 3H), 7.31 - 7.28 (m, 1H), 7.24 - 7.22 (m, 2H), 3.93 (s, 3H), 2.41 (s, 3H). <sup>13</sup>C NMR (125 MHz, CDCl<sub>3</sub>) δ 167.0, 166.9, 165.0, 138.6, 134.6, 130.3, 130.1, 129.7, 127.8, 126.2, 125.6, 123.9, 120.5, 108.4, 56.2, 16.2. HRMS (ESI) Calcd for C<sub>16</sub>H<sub>13</sub>NO<sub>3</sub>SNa<sup>+</sup> ([M + Na]<sup>+</sup>) 322.0508, Found: 322.0513.

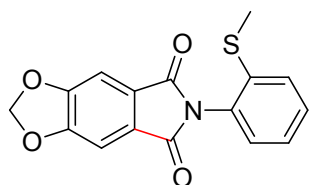

*6-(2-(methylthio)phenyl)-5H-[1,3]dioxolo[4,5-f]isoindole-5,7(6H)-dione (2i)*: Yellow solid (21.9 mg, 35% yield). m.p. 225-227 °C. <sup>1</sup>H NMR (500 MHz, CDCl<sub>3</sub>) δ 7.46-7.43 (m, 1H), 7.41 - 7.40 (m, 1H), 7.32 - 7.31 (m, 2H), 7.29 - 7.25 (m, 1H), 7.23 - 7.22 (m, 1H), 6.19 (s, 2H), 2.42 (s, 3H). <sup>13</sup>C NMR (125 MHz, CDCl<sub>3</sub>) δ 166.7, 153.1, 138.7, 130.4, 130.2, 129.8, 127.9, 127.7, 126.3, 104.3, 103.2, 16.3. HRMS (ESI) Calcd for C<sub>16</sub>H<sub>12</sub>NO<sub>4</sub>S<sup>+</sup> ([M + H]<sup>+</sup>) 314.0482, Found: 314.0499.

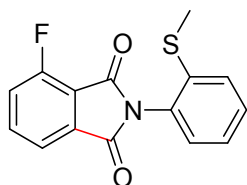

*4-fluoro-2-(2-(methylthio)phenyl)isoindoline-1,3-dione (2j)*: Yellow solid (11.5 mg, 20% yield). m.p. 136-138 °C. <sup>1</sup>H NMR (500 MHz, CDCl<sub>3</sub>) δ 7.81-7.78 (m, 2H), 7.48-7.43 (m, 3H), 7.33-7.30 (m, 1H), 7.24 (d, *J* = 8.0 Hz, 1H), 2.43 (s, 3H). <sup>13</sup>C NMR (125 MHz, CDCl<sub>3</sub>) δ 166.1, 163.8, 158.0 (d, *J*<sub>C-F</sub> = 265 Hz), 138.6, 137.0, 134.3, 130.4, 130.0, 129.7, 128.4, 126.5, 122.8 (d, *J*<sub>C-F</sub> = 20.0 Hz), 120.2, 118.0 (d, *J*<sub>C-F</sub> = 12.5 Hz), 16.5. HRMS (ESI) Calcd for C<sub>15</sub>H<sub>10</sub>NFO<sub>2</sub>SNa<sup>+</sup> ([M +Na]<sup>+</sup>) 310.0308, Found: 310.0309.

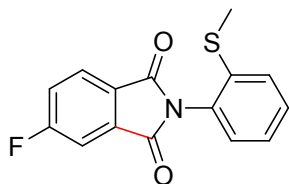

*5-fluoro-2-(2-(methylthio)phenyl)isoindoline-1,3-dione (2k)*: Yellow solid (28.1 mg, 49% yield). m.p. 161-163 °C. <sup>1</sup>H NMR (500 MHz, CDCl<sub>3</sub>) δ 7.97-7.95 (m, 1H), 7.63 (d, *J* = 7.0 Hz, 1H), 7.48-7.42 (m, 3H), 7.32-7.29 (m, 1H), 7.24 (d, *J* = 7.5 Hz, 1H), 2.42 (s, 3H). <sup>13</sup>C NMR (125 MHz, CDCl<sub>3</sub>) δ 166.7 (d, *J*<sub>C-F</sub> = 256.3 Hz), 166.1, 165.8, 138.5, 134.9, 130.4, 130.0, 129.6, 128.1, 127.8, 126.4 (d, *J*<sub>C-F</sub> = 10 Hz), 126.3, 121.5 (d, *J*<sub>C-F</sub> = 23.8 Hz), 111.7 (d, *J*<sub>C-F</sub> = 25 Hz), 16.3. HRMS (ESI) Calcd for C<sub>15</sub>H<sub>11</sub>NFO<sub>2</sub>S<sup>+</sup> ([M +H]<sup>+</sup>) 288.0489, Found: 288.0499.

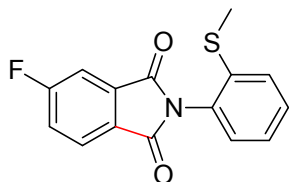

*5-fluoro-2-(2-(methylthio)phenyl)isoindoline-1,3-dione (2l)*: Yellow solid (24 mg, 42% yield). m.p. 161-163 °C. <sup>1</sup>H NMR (500 MHz, CDCl<sub>3</sub>) δ 7.97 - 7.95 (m, 1H), 7.63 (d, *J* = 6.5 Hz, 1H), 7.47-7.42 (m, 3H), 7.32 - 7.29 (m, 1H), 7.24 (d, *J* = 8.0 Hz, 1H), 2.42 (s, 3H). <sup>13</sup>C NMR (125 MHz, CDCl<sub>3</sub>) δ 166.7 (d, *J*<sub>C-F</sub> = 255 Hz), 166.1, 165.8, 138.5, 134.9, 130.4, 130.1, 129.6, 128.1, 127.9, 126.4, (d, *J*<sub>C-F</sub> = 10 Hz), 126.3, 121.5 (d, *J* = 23.8 Hz), 111.7 (d, *J* = 25 Hz), 16.4. HRMS (ESI) Calcd for C<sub>15</sub>H<sub>11</sub>NFO<sub>2</sub>S<sup>+</sup> ([M +H]<sup>+</sup>) 288.0489, Found: 288.0495.

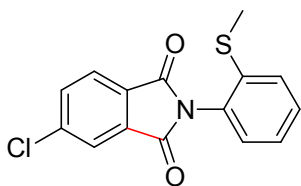

*5-chloro-2-(2-(methylthio)phenyl)isoindoline-1,3-dione (2m)*: Yellow solid (35.3 mg, 60% yield). m.p. 157-159 °C. <sup>1</sup>H NMR (500 MHz, CDCl<sub>3</sub>) δ 7.92 (s, 1H), 7.89 (d, *J* =



8.0 Hz, 1H), 7.75 (d,  $J = 8.0$  Hz, 1H), 7.48-7.41 (m, 2H), 7.32 - 7.29 (m, 1H), 7.23 (d,  $J = 7.5$  Hz, 1H), 2.41 (s, 3H).  $^{13}\text{C}$  NMR (125 MHz,  $\text{CDCl}_3$ )  $\delta$  166.2, 165.8, 141.1, 138.5, 134.5, 133.7, 130.4, 130.1, 129.9, 129.6, 128.1, 126.3, 125.2, 124.3, 16.3. HRMS (ESI) Calcd for  $\text{C}_{15}\text{H}_{11}\text{NClO}_2\text{S}^+$  ( $[\text{M} + \text{H}]^+$ ) 304.0194, Found: 304.0199.

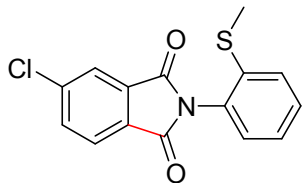

*5-chloro-2-(2-(methylthio)phenyl)isoindoline-1,3-dione (2n)*: Yellow solid (34.1 mg, 58% yield). m.p. 157-159 °C.  $^1\text{H}$  NMR (500 MHz,  $\text{CDCl}_3$ )  $\delta$  7.92 (s, 1H), 7.88 (d,  $J = 8.0$  Hz, 1H), 7.75 (d,  $J = 8.0$  Hz, 1H), 7.47-7.41 (m, 2H), 7.32-7.29 (m, 1H), 7.23 (d,  $J = 7.5$  Hz, 1H), 2.41 (s, 3H).  $^{13}\text{C}$  NMR (125 MHz,  $\text{CDCl}_3$ )  $\delta$  166.2, 165.9, 141.1, 138.5, 134.5, 133.7, 130.3, 130.1, 130.0, 129.6, 128.1, 126.3, 125.2, 124.3, 16.4. HRMS (ESI) Calcd for  $\text{C}_{15}\text{H}_{11}\text{NClO}_2\text{S}^+$  ( $[\text{M} + \text{H}]^+$ ) 304.0194, Found: 304.0205.

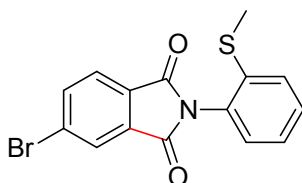

*5-bromo-2-(2-(methylthio)phenyl)isoindoline-1,3-dione (2o)*: Yellow solid (36.0 mg, 52% yield). m.p. 156-158 °C.  $^1\text{H}$  NMR (500 MHz,  $\text{CDCl}_3$ )  $\delta$  8.10 (s, 1H), 7.93 (d,  $J = 8.0$  Hz, 1H), 7.82 (d,  $J = 8.0$  Hz, 1H), 7.48-7.45 (m, 1H), 7.43 (d,  $J = 7.5$  Hz, 1H), 7.33-7.30 (m, 1H), 7.23 (d,  $J = 8.0$  Hz, 1H), 2.42 (s, 3H).  $^{13}\text{C}$  NMR (125 MHz,  $\text{CDCl}_3$ )  $\delta$  166.4, 165.9, 138.5, 137.5, 133.7, 130.6, 130.4, 130.0, 129.6, 129.4, 128.2, 127.3, 126.4, 125.4, 16.4. HRMS (ESI) Calcd for  $\text{C}_{15}\text{H}_{11}\text{NBrO}_2\text{S}^+$  ( $[\text{M} + \text{H}]^+$ ) 347.9688, Found: 347.9703.

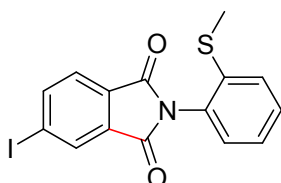

*5-iodo-2-(2-(methylthio)phenyl)isoindoline-1,3-dione (2p)*: White solid (18.1 mg, 23% yield). m.p. 98-100 °C.  $^1\text{H}$  NMR (500 MHz,  $\text{CDCl}_3$ )  $\delta$  8.31 (s, 1H), 8.16 (d,  $J = 8.0$  Hz, 1H), 7.68 (d,  $J = 7.5$  Hz, 1H), 7.48-7.45 (m, 1H), 7.43 (d,  $J = 7.5$  Hz, 1H), 7.33-7.30 (m, 1H), 7.23 (d,  $J = 8.0$  Hz, 1H), 2.42 (s, 3H).  $^{13}\text{C}$  NMR (125 MHz,  $\text{CDCl}_3$ )  $\delta$  166.7, 165.8, 143.5, 138.6, 133.4, 133.1, 131.2, 130.4, 130.0, 129.7, 128.3, 126.4, 125.3, 101.4, 16.5. HRMS (ESI) Calcd for  $\text{C}_{15}\text{H}_{11}\text{NIO}_2\text{S}^+$  ( $[\text{M} + \text{H}]^+$ ) 395.9550, Found: 395.9564.

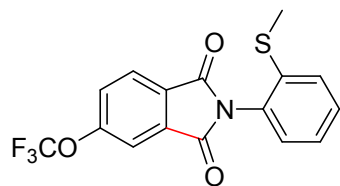

2-(2-(methylthio)phenyl)-5-(trifluoromethoxy)isoindoline-1,3-dione (**2q**): Yellow solid (37.4 mg, 53% yield). m.p. 86-88 °C. <sup>1</sup>H NMR (500 MHz, CDCl<sub>3</sub>) δ 8.02 (d, *J* = 8.0 Hz, 1H), 7.80 (s, 1H), 7.61 (d, *J* = 8.0 Hz, 1H), 7.50-7.47 (m, 1H), 7.44 (d, *J* = 7.5 Hz, 1H), 7.34-7.31 (m, 1H), 7.24 (d, *J* = 8.0 Hz, 1H), 2.43 (s, 3H). <sup>13</sup>C NMR (125 MHz, CDCl<sub>3</sub>) δ 165.9, 165.7, 153.9, 138.5, 134.4, 130.5, 130.0, 129.9, 129.6, 128.3, 126.47, 126.45, 126.0, 120.4 (q, *J* = 258.8 Hz), 116.1, 16.4. HRMS (ESI) Calcd for C<sub>16</sub>H<sub>10</sub>NF<sub>3</sub>O<sub>3</sub>SNa<sup>+</sup> ([M + Na]<sup>+</sup>) 376.0226, Found: 376.0241.

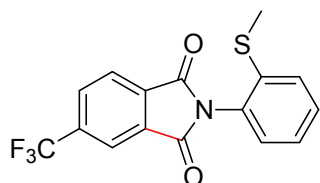

2-(2-(methylthio)phenyl)-5-(trifluoromethyl)isoindoline-1,3-dione (**2r**): Yellow solid (30.3 mg, 45% yield). m.p. 147-149 °C. <sup>1</sup>H NMR (500 MHz, CDCl<sub>3</sub>) δ 8.24 (s, 1H), 8.12-8.08 (m, 2H), 7.51-7.48 (m, 1H), 7.45 (d, *J* = 8.0 Hz, 1H), 7.35-7.32 (m, 1H), 7.25 (d, *J* = 7.5 Hz, 1H), 2.43 (s, 3H). <sup>13</sup>C NMR (125 MHz, CDCl<sub>3</sub>) δ 165.9, 165.8, 138.5, 136.6 (q, *J* = 34.0 Hz), 134.9, 132.8, 131.6, 130.6, 129.8, 129.6, 128.3, 126.5, 124.6, 123.2 (q, *J* = 272.5 Hz), 121.3, 16.4. HRMS (ESI) Calcd for C<sub>16</sub>H<sub>11</sub>NF<sub>3</sub>OS<sup>+</sup> ([M + H]<sup>+</sup>) 338.0457, Found: 376.0480.

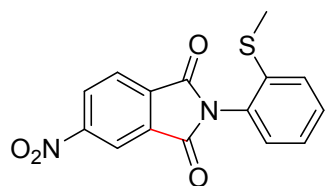

2-(2-(methylthio)phenyl)-5-nitroisoindoline-1,3-dione (**2s**): Yellow solid (11.3 mg, 18% yield). m.p. 162-164 °C. <sup>1</sup>H NMR (500 MHz, CDCl<sub>3</sub>) δ 8.78 (s, 1H), 8.67 (d, *J* = 8.0 Hz, 1H), 8.16 (d, *J* = 8.5 Hz, 1H), 7.52-7.49 (m, 1H), 7.46 (d, *J* = 8.0 Hz, 1H), 7.35-7.32 (m, 1H), 7.26 (d, *J* = 7.5 Hz, 1H), 2.43 (s, 3H). <sup>13</sup>C NMR (125 MHz, CDCl<sub>3</sub>) δ 165.1, 164.9, 152.2, 138.4, 136.4, 133.5, 130.7, 129.7, 129.5, 128.5, 128.4, 126.6, 125.3, 119.4, 16.5. HRMS (ESI) Calcd for C<sub>15</sub>H<sub>11</sub>N<sub>2</sub>O<sub>4</sub>S<sup>+</sup> ([M + H]<sup>+</sup>) 315.0434, Found: 315.0438.

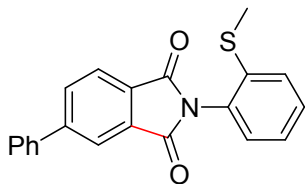

*2-(2-(methylthio)phenyl)-5-phenylisoindoline-1,3-dione (2t)*: Yellow solid (38.6 mg, 56% yield). m.p. 204-206 °C. <sup>1</sup>H NMR (500 MHz, CDCl<sub>3</sub>) δ 8.15 (s, 1H), 8.00-7.96 (m, 2H), 7.65 (d, *J* = 7.5 Hz, 2H), 7.51-7.48 (m, 2H), 7.45-7.43 (m, 3H), 7.31-7.28 (m, 1H), 7.24 (d, *J* = 6.0 Hz, 1H), 2.41 (s, 3H). <sup>13</sup>C NMR (125 MHz, CDCl<sub>3</sub>) δ 167.2, 167.1, 147.9, 139.1, 138.6, 133.0, 132.9, 130.5, 130.3, 130.2, 129.7, 129.3, 129.0, 128.1, 127.5, 126.3, 124.4, 122.5, 16.4. HRMS (ESI) Calcd for C<sub>21</sub>H<sub>16</sub>NO<sub>2</sub>S<sup>+</sup> ([M + H]<sup>+</sup>) 346.0896, Found: 346.0895.

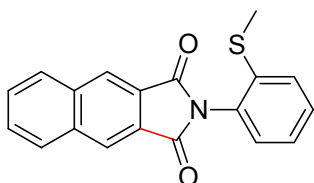

*2-(2-(methylthio)phenyl)-1H-benzo[ff]isoindole-1,3(2H)-dione (2u)*: Yellow solid (35.1 mg, 55% yield). m.p. 196-198 °C. <sup>1</sup>H NMR (500 MHz, CDCl<sub>3</sub>) δ 8.46 (s, 2H), 8.10 - 8.08 (m, 2H), 7.73 - 7.71 (m, 2H), 7.49-7.45 (m, 2H), 7.35-7.30 (m, 2H), 2.43 (s, 3H). <sup>13</sup>C NMR (125 MHz, CDCl<sub>3</sub>) δ 167.0, 138.5, 135.8, 130.6, 130.5, 130.2, 129.6, 129.4, 128.2, 127.8, 126.4, 125.5, 16.4. HRMS (ESI) Calcd for C<sub>19</sub>H<sub>14</sub>NO<sub>2</sub>S<sup>+</sup> ([M + H]<sup>+</sup>) 320.0740, Found: 320.0734.

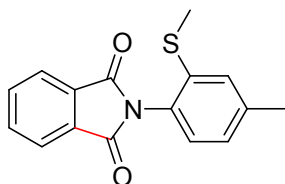

*2-(4-methyl-2-(methylthio)phenyl)isoindoline-1,3-dione (4a)*: White solid (35.1mg, 62% yield), m.p. 168-170°C. <sup>1</sup>H NMR (400 MHz, CDCl<sub>3</sub>) δ 7.96 - 7.94 (m, 2H), 7.79 - 7.77 (m, 2H), 7.22 (s, 1H), 7.14 - 7.10 (m, 2H), 2.41 (s, 3H), 2.40 (s, 3H). <sup>13</sup>C NMR (125 MHz, CDCl<sub>3</sub>) δ 167.4, 140.4, 138.0, 134.4, 132.1, 129.4, 128.7, 127.6, 127.2, 123.9, 21.5, 16.4. HRMS (ESI) Calcd for C<sub>16</sub>H<sub>13</sub>NNaO<sub>2</sub>S<sup>+</sup> ([M + Na]<sup>+</sup>) 306.0559, Found: 306.0554.

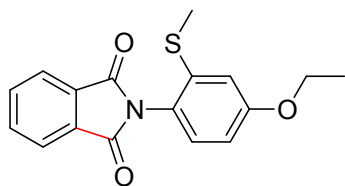

*2-(4-ethoxy-2-(methylthio)phenyl)isoindoline-1,3-dione (4b)*: White solid (40.7mg, 65% yield), m.p. 138-140 °C. <sup>1</sup>H NMR (400 MHz, CDCl<sub>3</sub>) δ 7.95 -7.93 (m, 2H), 7.79 - 7.77 (m, 2H), 7.14 (d, *J* = 8.8 Hz, 1H), 6.90 (s, 1H), 6.79 (d, *J* = 8.8 Hz, 1H), 4.07 (q, *J* = 6.8 Hz, 2H), 2.40 (s, 3H), 1.44 (t, *J* = 6.8 Hz, 3H). <sup>13</sup>C NMR (125 MHz, CDCl<sub>3</sub>) δ 167.6, 160.2, 139.8, 134.4, 132.1, 130.5, 123.9, 122.4, 114.3, 111.5, 64.0, 16.1, 14.9. HRMS (ESI) Calcd for C<sub>17</sub>H<sub>16</sub>NO<sub>3</sub>S<sup>+</sup> ([M + H]<sup>+</sup>) 314.0845, Found: 314.0842.

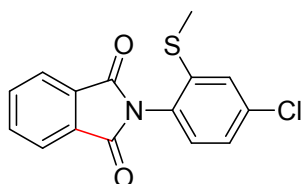

*2-(4-chloro-2-(methylthio)phenyl)isoindoline-1,3-dione (4c)*: White solid (36.4mg, 60% yield), m.p. 118-120 °C. <sup>1</sup>H NMR (400 MHz, CDCl<sub>3</sub>) δ 8.00 - 7.98 (m, 2H), 7.85 - 7.83 (m, 2H), 7.37 (s, 1H), 7.30 (d, *J* = 9.6 Hz, 1H), 7.21 (d, *J* = 8.4 Hz, 1H), 2.47 (s, 3H). <sup>13</sup>C NMR (125 MHz, CDCl<sub>3</sub>) δ 166.9, 140.9, 136.2, 134.6, 131.9, 130.7, 128.3, 127.0, 126.1, 124.0, 15.9. HRMS (ESI) Calcd for C<sub>15</sub>H<sub>10</sub>ClNNO<sub>2</sub>S<sup>+</sup> ([M + Na]<sup>+</sup>) 326.0013, Found: 326.0034.

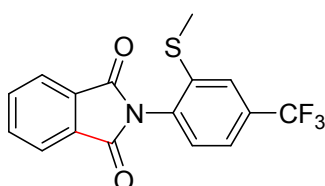

*2-(2-(methylthio)-4-(trifluoromethyl)phenyl)isoindoline-1,3-dione (4d)*: White solid (34.3mg, 51% yield). m.p. 87-89 °C. <sup>1</sup>H NMR (400 MHz, CDCl<sub>3</sub>) δ 7.99 - 7.97 (m, 2H), 7.84 - 7.82 (m, 2H), 7.69 (d, *J* = 8.4 Hz, 1H), 7.50 (s, 1H), 7.45 (d, *J* = 8.4 Hz, 1H), 2.47 (s, 3H). <sup>13</sup>C NMR (125 MHz, CD<sub>3</sub>Cl) δ 166.68, 144.33, 134.72, 131.85, 129.72, 128.0 (q, *J* = 33.8 Hz), 126.8, 126.59, 124.11, 123.7 (q, *J* = 271.3 Hz), 113.7, 15.34. HRMS (ESI) Calcd for C<sub>16</sub>H<sub>10</sub>F<sub>3</sub>NO<sub>2</sub>S<sup>+</sup> ([M + H]<sup>+</sup>) 338.0457, Found: 338.0465.

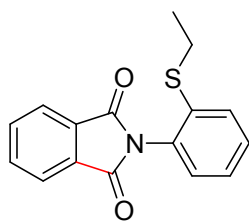

*2-(2-(ethylthio)phenyl)isoindoline-1,3-dione (4e)*: White solid (29.4 mg, 52% yield), m.p. 127-129°C. <sup>1</sup>H NMR (400 MHz, CDCl<sub>3</sub>) δ 8.02 - 7.99 (m, 2H), 7.86 - 7.83 (m, 2H), 7.57 (d, *J* = 8.0 Hz, 1H), 7.50-7.47 (m, 1H), 7.40-7.37 (m, 1H), 7.31 (d, *J* = 6.8 Hz, 1H), 2.93 (q, *J* = 7.6 Hz, 2H), 1.26 (t, *J* = 7.6 Hz, 3H). <sup>13</sup>C NMR (125 MHz, CDCl<sub>3</sub>) δ 167.3, 137.0, 134.4, 132.1, 131.6, 130.4, 130.0, 129.8, 127.0, 123.9, 28.2, 14.3. HRMS (ESI) Calcd for C<sub>16</sub>H<sub>14</sub>NO<sub>2</sub>S<sup>+</sup> ([M + H]<sup>+</sup>), 284.0740, Found: 284.0739.

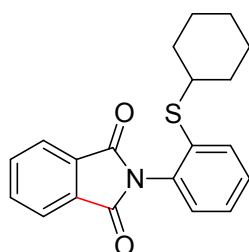

*2-(2-(cyclohexylthio)phenyl)isoindoline-1,3-dione (4f)*: White solid (41.1mg, 61% yield), m.p. 108-110°C. <sup>1</sup>H NMR (400 MHz, CDCl<sub>3</sub>) δ 7.98 - 7.96 (m, 2H), 7.81 - 7.78 (m, 2H), 7.62 (d, *J* = 8.0 Hz, 1H), 7.45-7.41 (m, 1H), 7.39-7.35 (m, 1H), 7.28 (d, *J* = 7.6 Hz, 1H), 3.10 - 3.03 (m, 1H), 1.89 - 1.85 (m, 2H), 1.67 - 1.66 (m, 2H), 1.56 - 1.53 (m, 1H), 1.29 - 1.19 (m, 5H). <sup>13</sup>C NMR (125 MHz, CDCl<sub>3</sub>) δ 167.4, 135.9, 134.4, 133.2, 133.1, 132.2, 129.9, 129.8, 127.8, 124.0, 47.5, 33.5, 26.1, 25.8. HRMS (ESI) Calcd for C<sub>20</sub>H<sub>19</sub>NNaO<sub>2</sub>S<sup>+</sup> ([M + Na]<sup>+</sup>) 360.1029, Found: 360.1027.

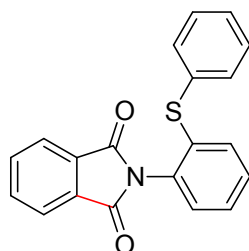

*2-(2-(phenylthio)phenyl)isoindoline-1,3-dione (4g)*: Yellow solid (35.1 mg, 53% yield). m.p. 105-107°C. <sup>1</sup>H NMR (500 MHz, CDCl<sub>3</sub>) δ 7.95 - 7.91 (m, 2H), 7.79 - 7.76 (m, 2H), 7.41 - 7.35 (m, 3H), 7.34 - 7.29 (m, 3H), 7.24 - 7.18 (m, 3H). <sup>13</sup>C NMR (125 MHz, CDCl<sub>3</sub>) δ 167.1, 136.6, 134.5, 134.3, 133.0, 132.0, 131.9, 131.8, 130.1,

129.9, 129.3, 128.2, 127.6, 123.9. HRMS (ESI) Calcd for  $C_{20}H_{13}NO_2SNa^+$  ( $[M + Na]^+$ ) 354.0559, Found: 354.0559.

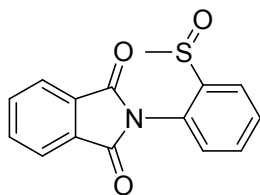

*2-(2-(methylsulfinyl)phenyl)isoindoline-1,3-dione (11)*: Yellow solid (24.3 mg, 85% yield). m.p. 161-163 °C.  $^1H$  NMR (500 MHz, DMSO)  $\delta$  8.17 (d,  $J = 7.5$  Hz, 1H), 8.02 - 8.01 (m, 2H), 7.95 - 7.93 (m, 3H), 7.87 - 7.84 (m, 1H), 7.74 (d,  $J = 8.0$  Hz, 1H), 3.19 (s, 3H).  $^{13}C$  NMR (125 MHz, DMSO)  $\delta$  167.5, 138.5, 135.3, 135.2, 132.8, 132.1, 131.2, 131.1, 130.3, 124.0, 44.0. HRMS (ESI) Calcd for  $C_{15}H_{12}NO_3S^+$  ( $[M + H]^+$ ) 286.0532, Found: 286.0539.

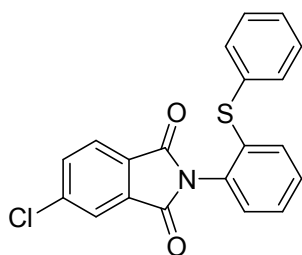

*5-chloro-2-(2-(phenylthio)phenyl)isoindoline-1,3-dione (12)*: White solid (27.4 mg, 75% yield), m.p. 112-114°C.  $^1H$  NMR (500 MHz,  $CDCl_3$ )  $\delta$  7.90 (s, 1H), 7.87 (d,  $J = 8.0$  Hz, 1H), 7.74 (d,  $J = 8.0$  Hz, 1H), 7.39 (s, 3H), 7.32-7.27 (m, 3H), 7.22 (d,  $J = 7.5$  Hz, 3H).  $^{13}C$  NMR (125 MHz,  $CDCl_3$ )  $\delta$  166.04, 165.72, 141.04, 136.49, 134.37, 133.57, 133.14, 131.91, 131.56, 130.27, 129.97, 129.82, 129.63, 129.26, 128.23, 127.65, 125.09, 124.26. HRMS (ESI) Calcd for  $C_{20}H_{13}ClNO_2S^+$  ( $[M + H]^+$ ) 366.0350, Found: 366.0362.

## 6. NMR Spectra for All Compounds.

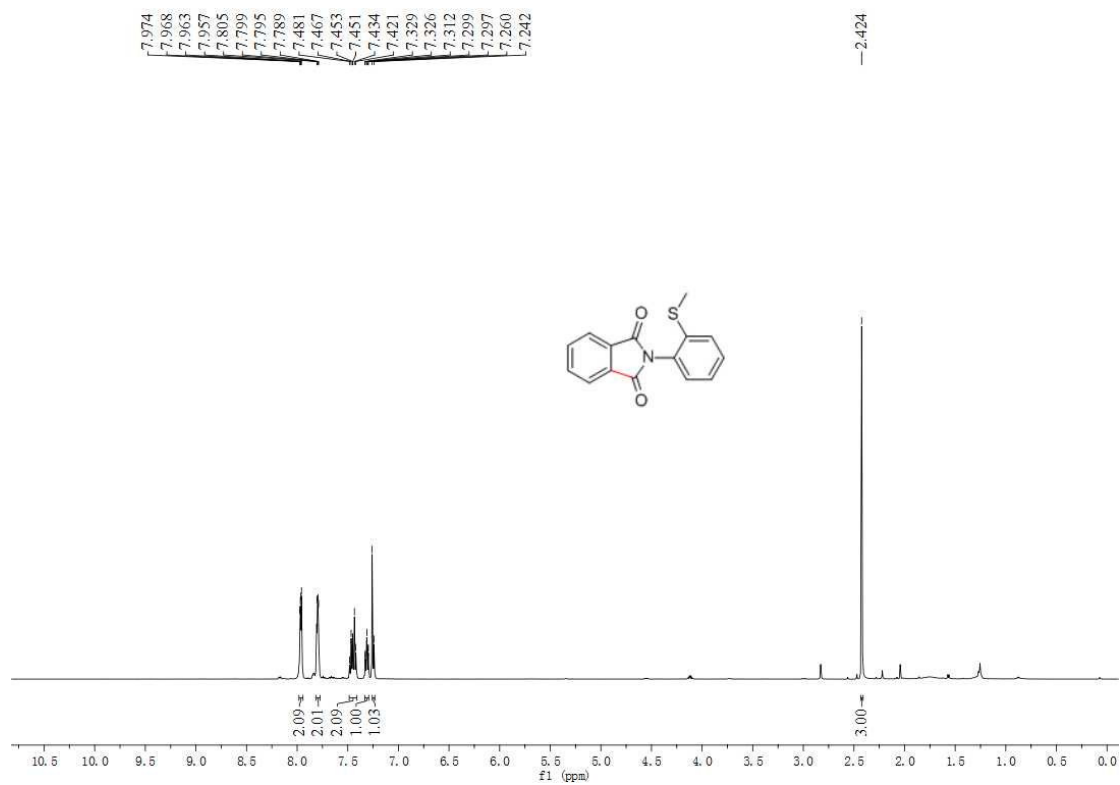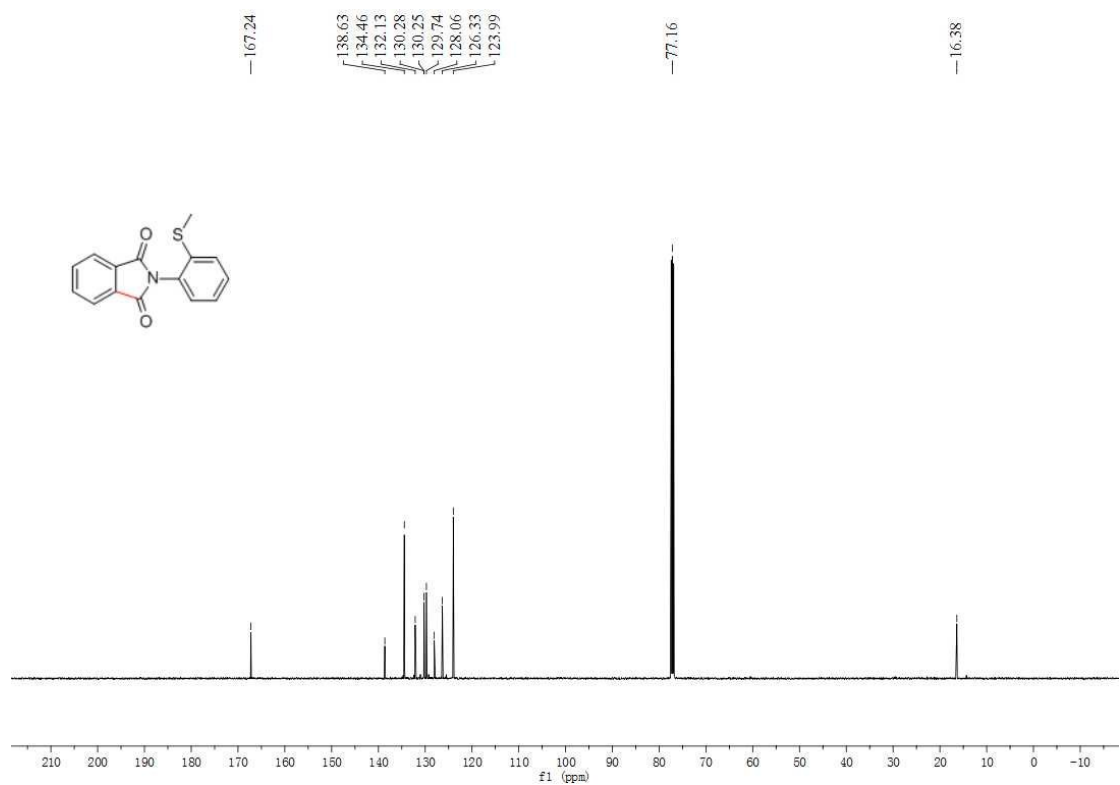

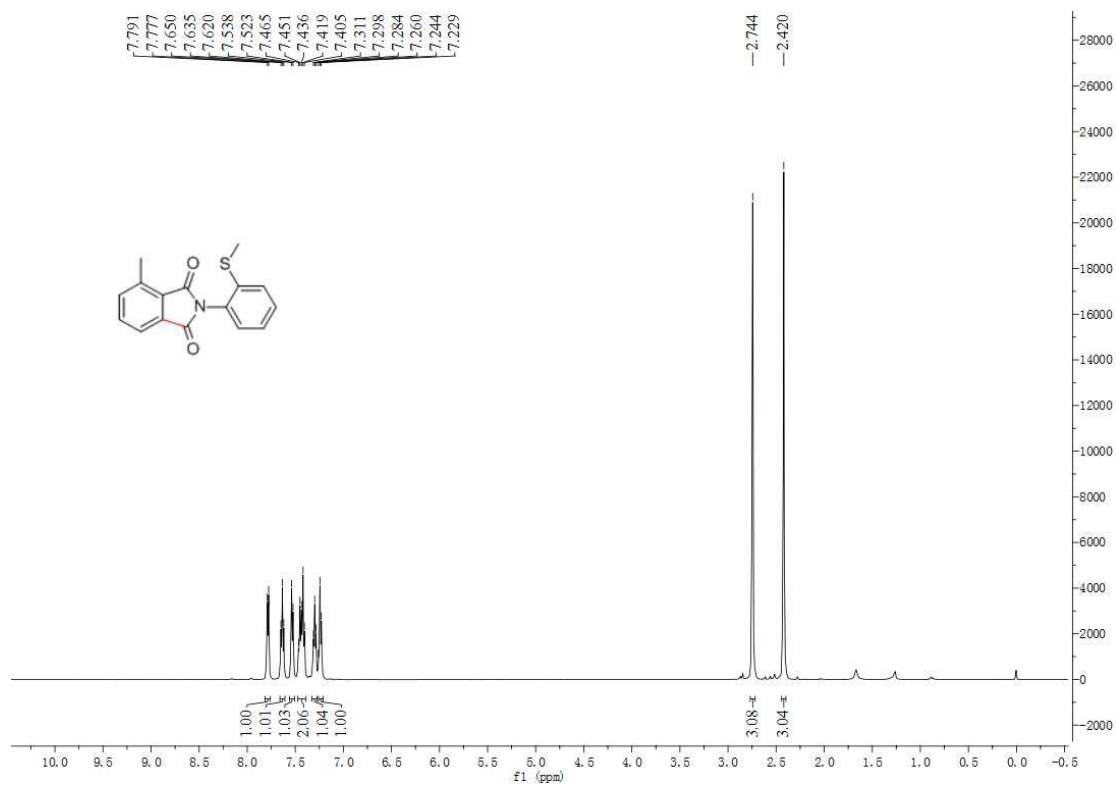

**<sup>1</sup>H NMR:4-methyl-2-(2-(methylthio)phenyl)isoindoline-1,3-dione (2b)**

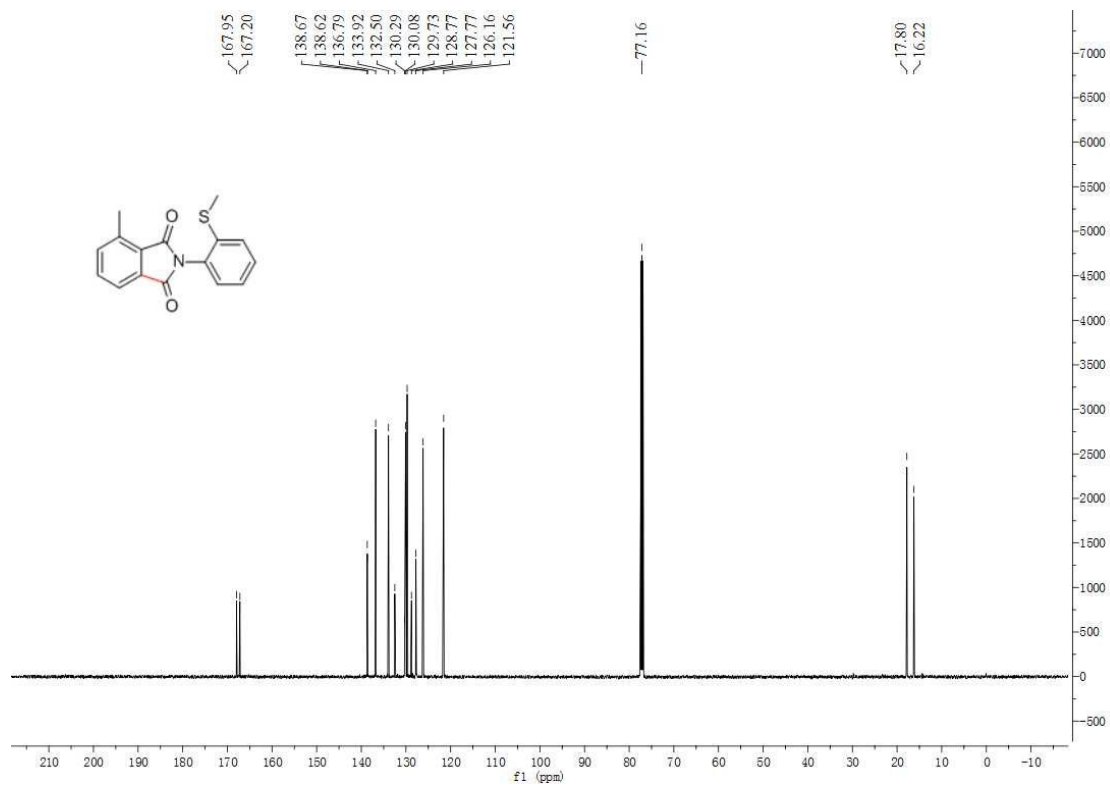

**<sup>13</sup>C NMR:4-methyl-2-(2-(methylthio)phenyl)isoindoline-1,3-dione (2b)**



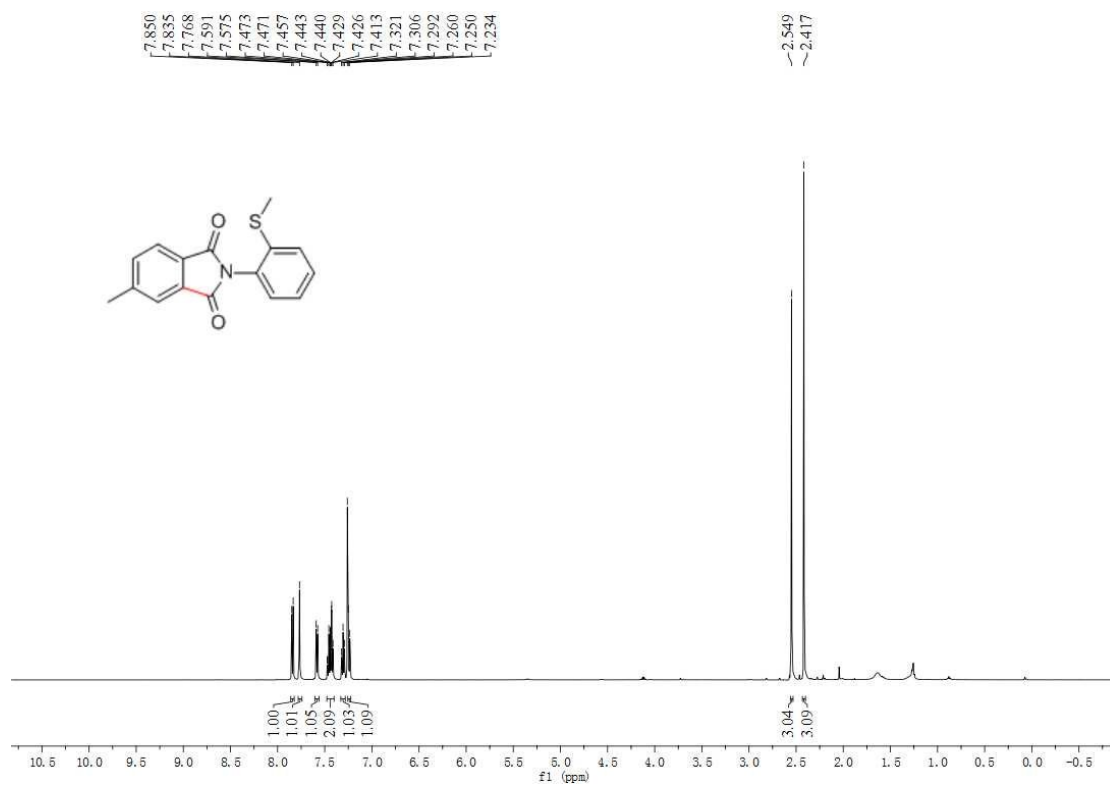

**<sup>1</sup>H NMR: 5-methyl-2-(2-(methylthio)phenyl)isoindoline-1,3-dione (2c)**

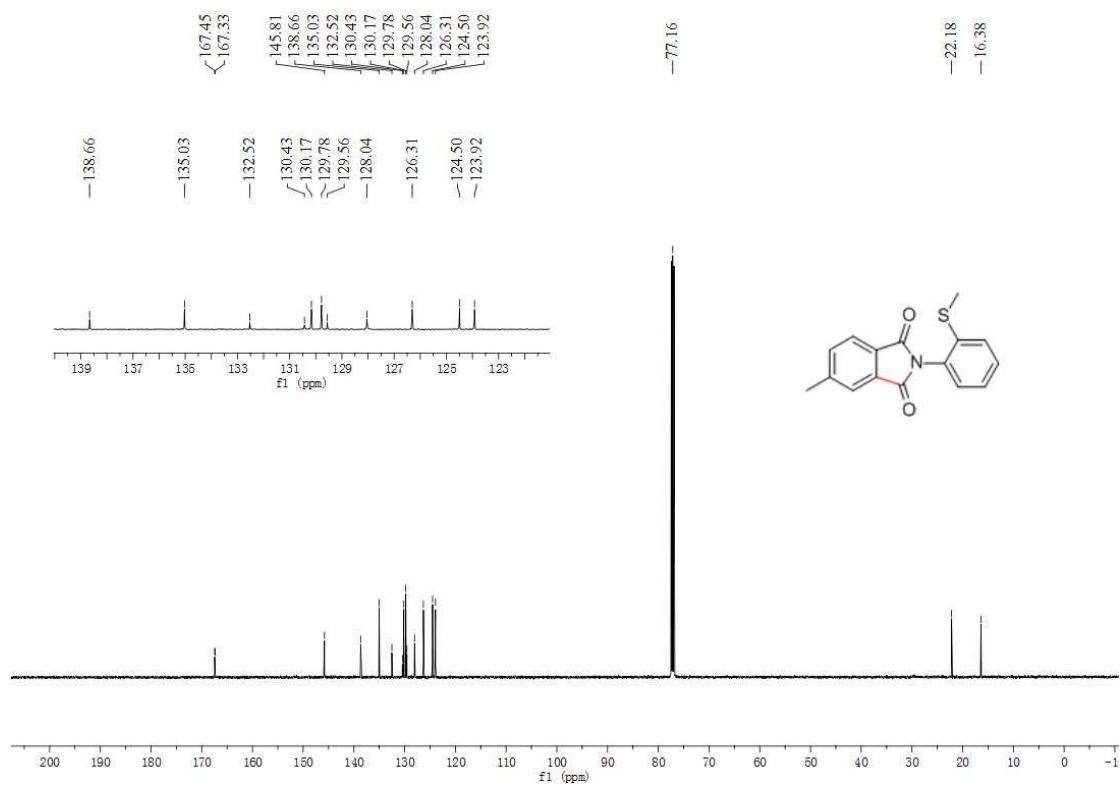

**<sup>13</sup>C NMR: 5-methyl-2-(2-(methylthio)phenyl)isoindoline-1,3-dione (2c)**

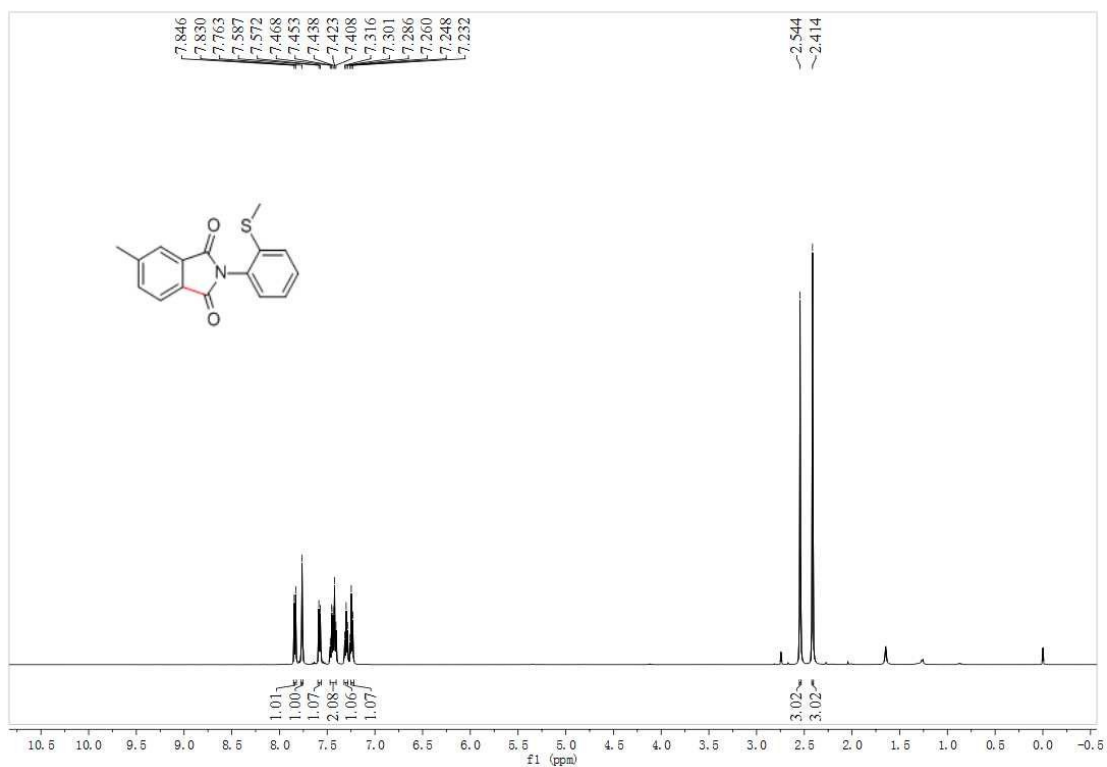

**<sup>1</sup>H NMR:5-methyl-2-(2-(methylthio)phenyl)isoindoline-1,3-dione (2d)**

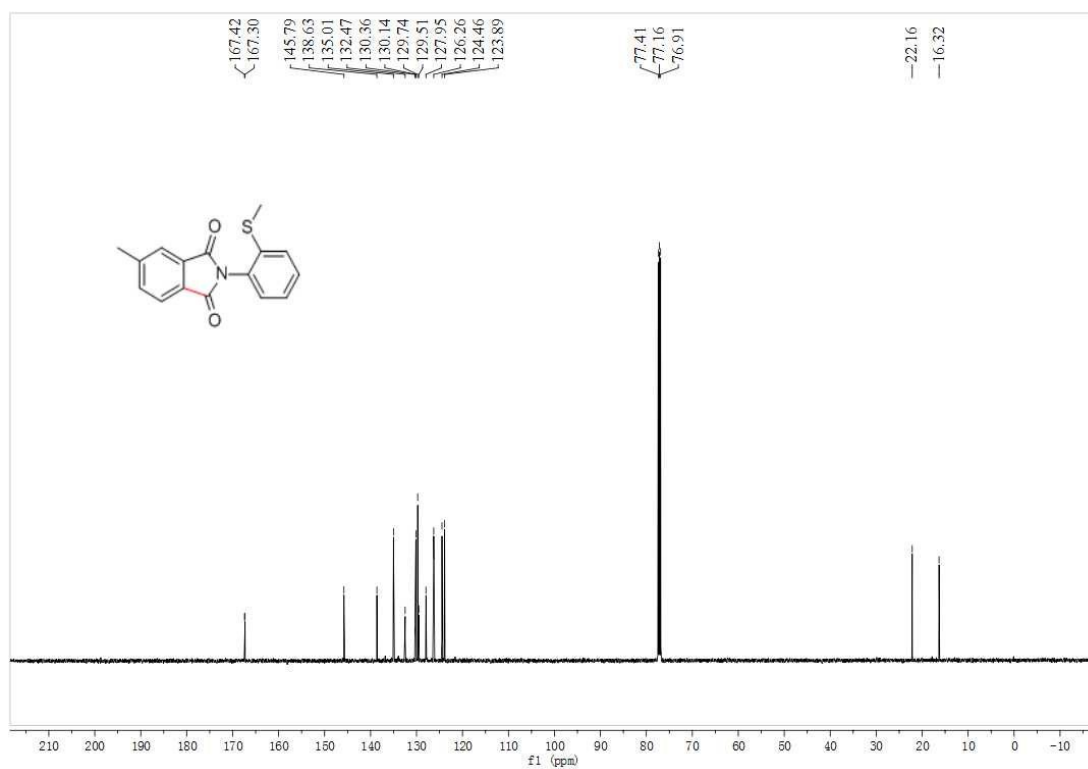

**<sup>13</sup>C NMR:5-methyl-2-(2-(methylthio)phenyl)isoindoline-1,3-dione (2d)**

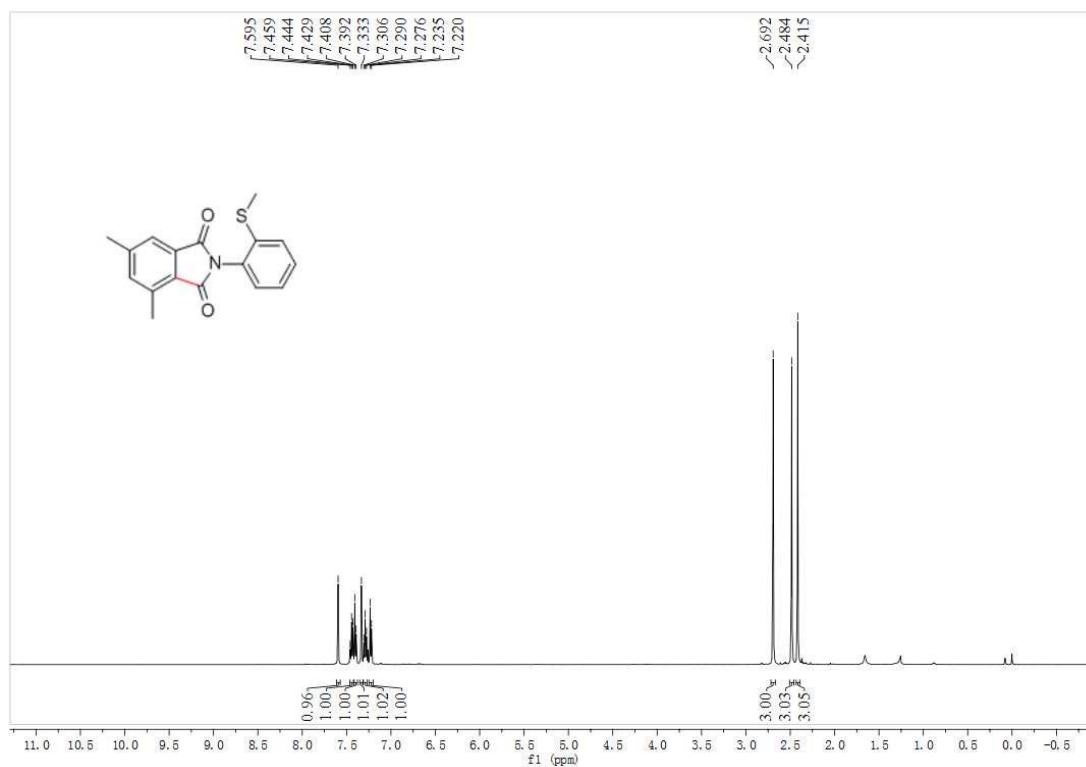

**<sup>1</sup>H NMR:4,6-dimethyl-2-(2-(methylthio)phenyl)isoindoline-1,3-dione (2e)**

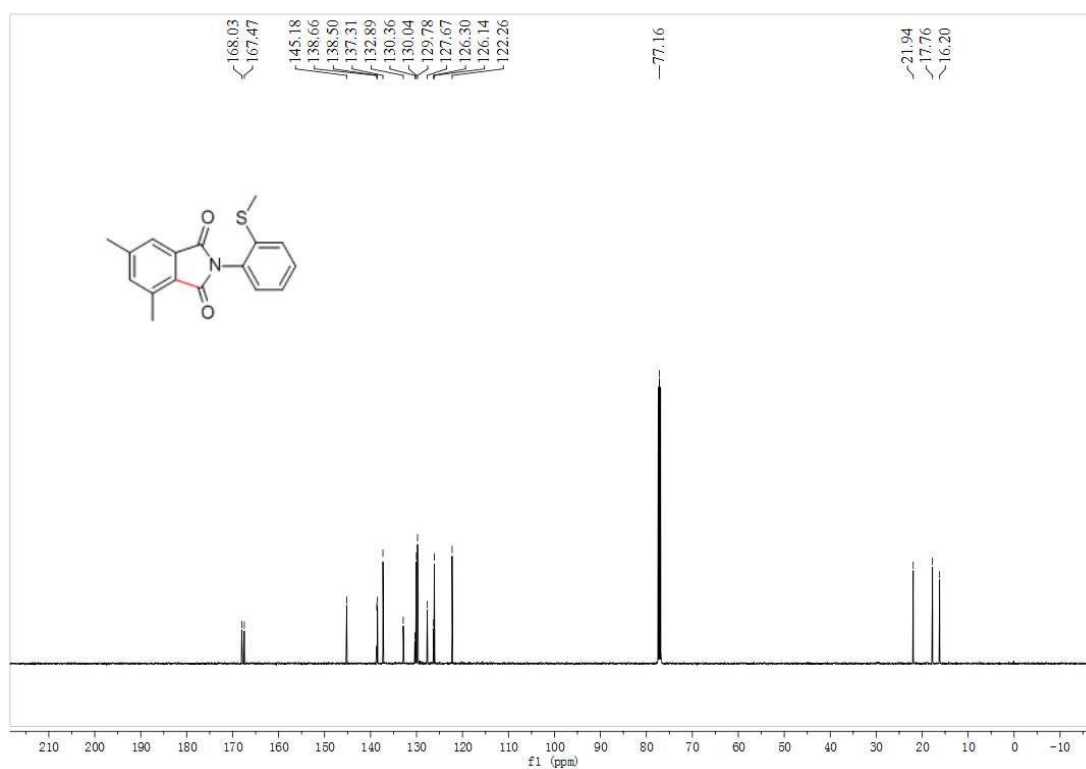

**<sup>13</sup>C NMR:4,6-dimethyl-2-(2-(methylthio)phenyl)isoindoline-1,3-dione (2e)**

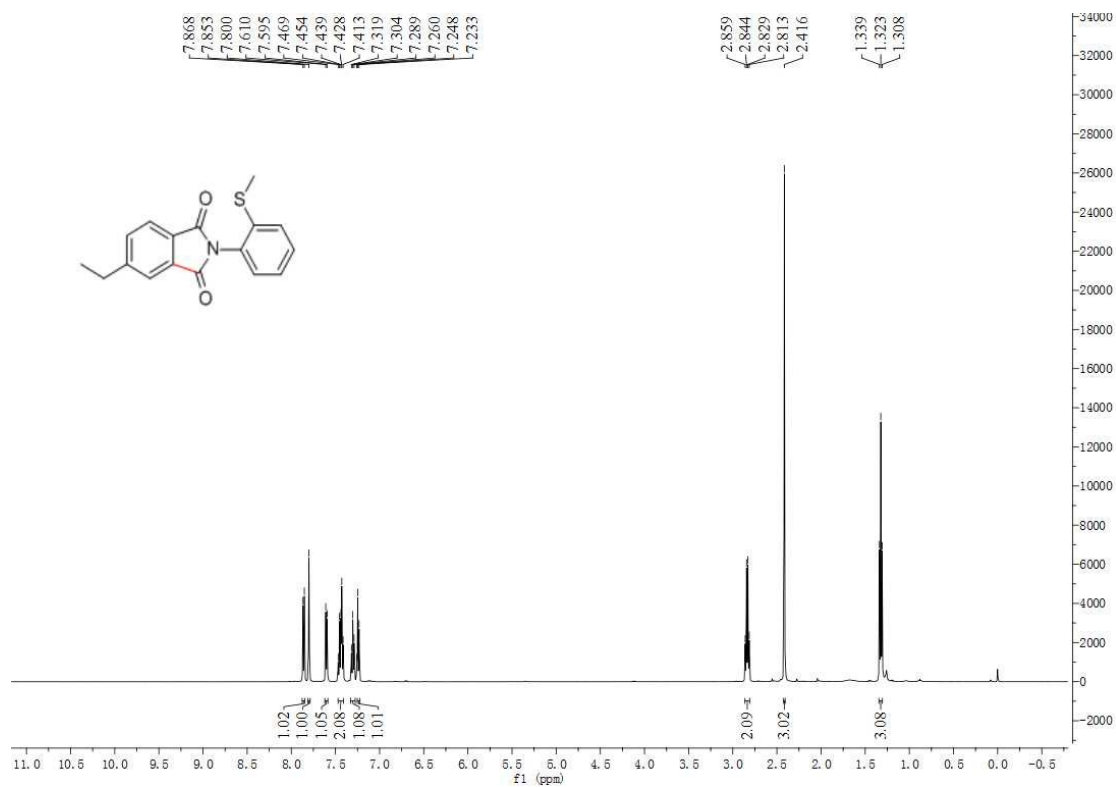

**<sup>1</sup>H NMR: 5-ethyl-2-(2-(methylthio)phenyl)isoindoline-1,3-dione (2f)**

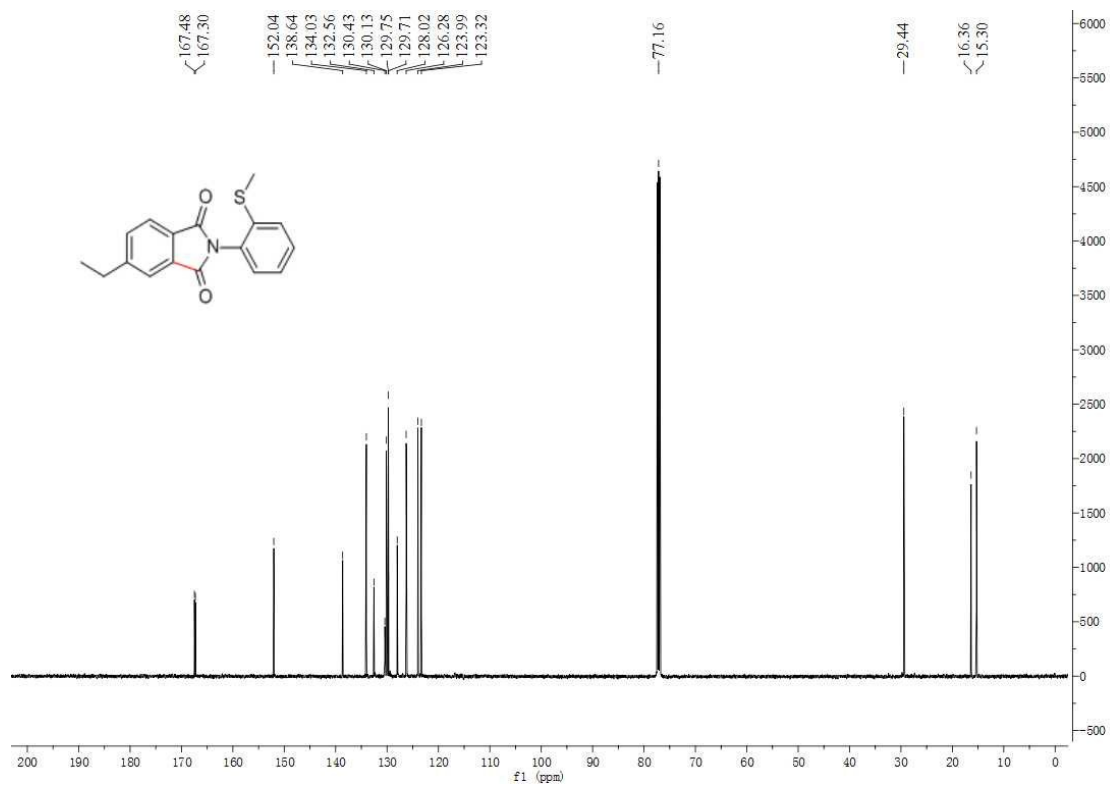

**<sup>13</sup>C NMR: 5-ethyl-2-(2-(methylthio)phenyl)isoindoline-1,3-dione (2f)**

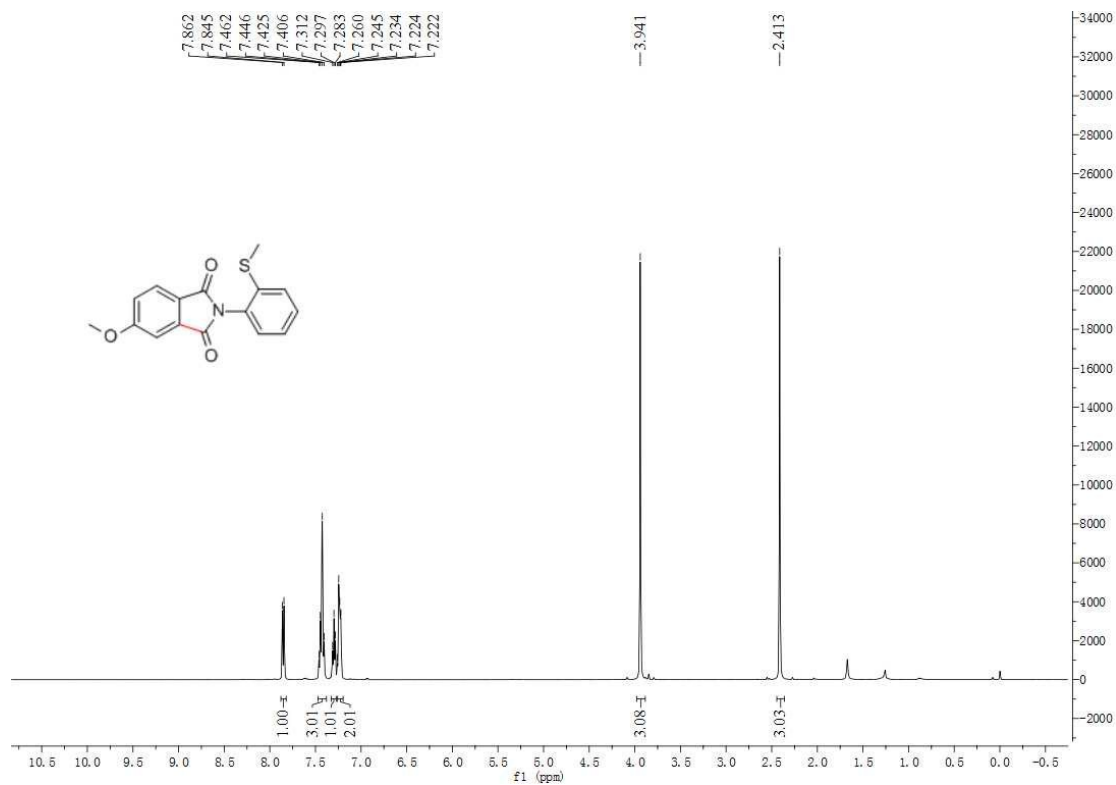

**<sup>1</sup>H NMR: 5-methoxy-2-(2-(methylthio)phenyl)isoindoline-1,3-dione (2g)**

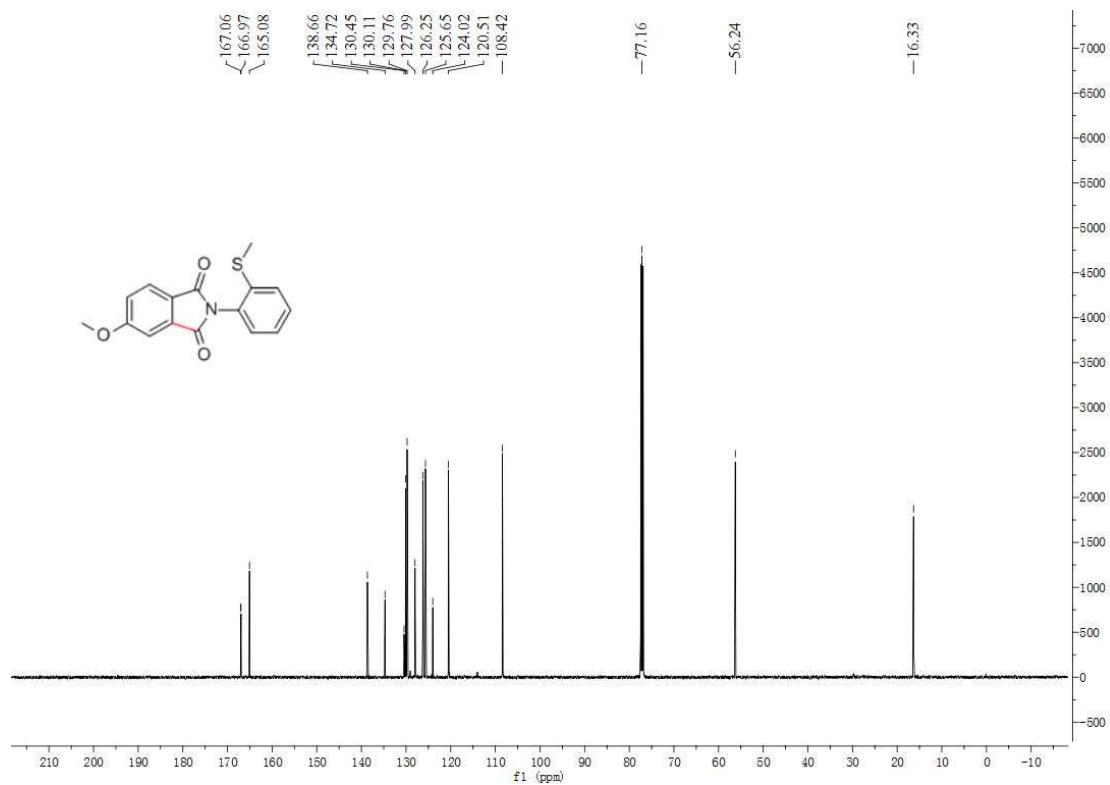

**<sup>13</sup>C NMR: 5-methoxy-2-(2-(methylthio)phenyl)isoindoline-1,3-dione (2g)**

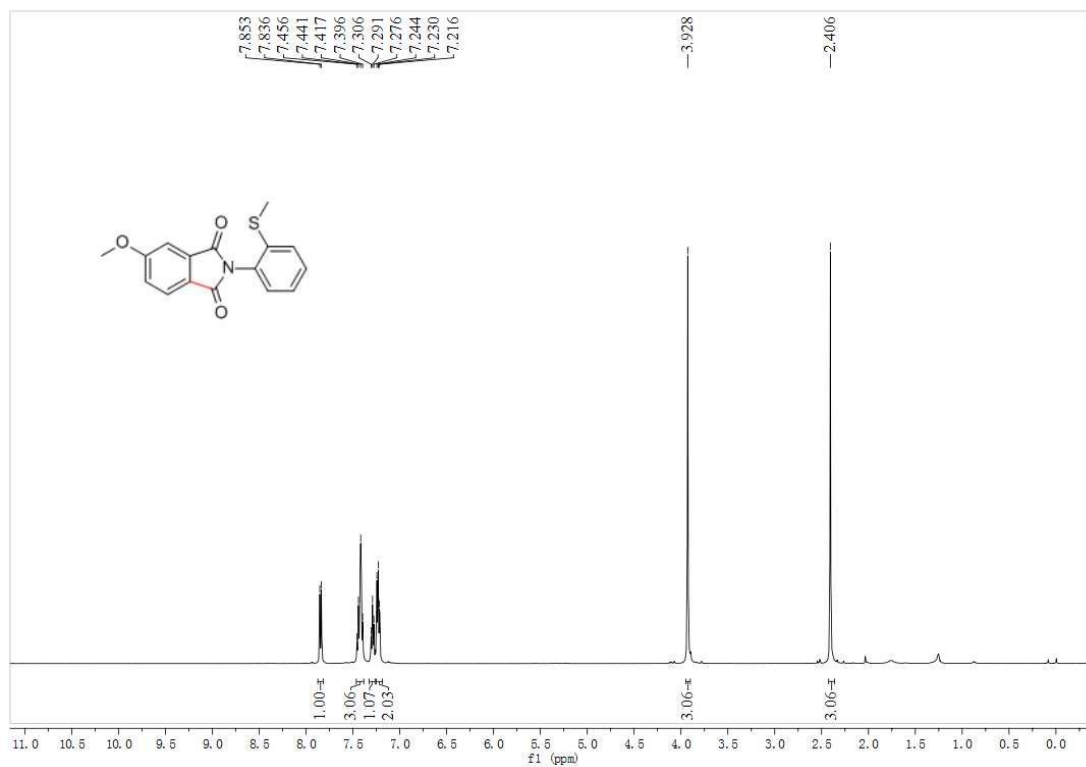

**<sup>1</sup>H NMR:5-methoxy-2-(2-(methylthio)phenyl)isoindoline-1,3-dione (2h)**

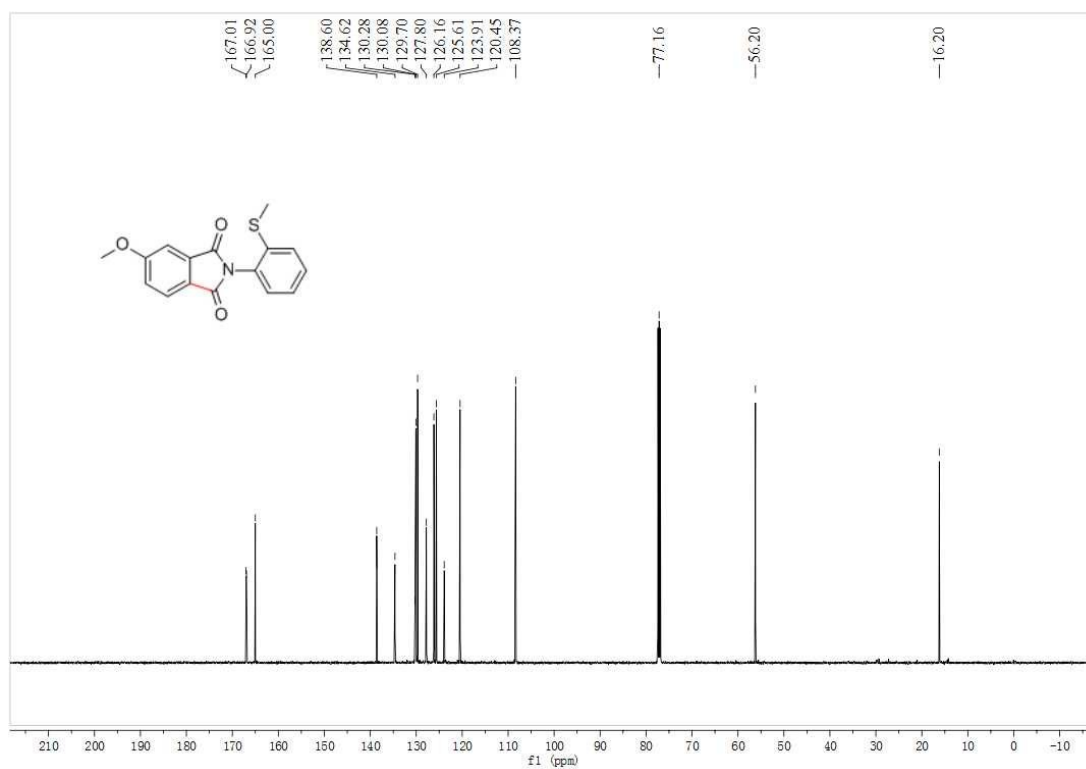

**<sup>13</sup>C NMR:5-methoxy-2-(2-(methylthio)phenyl)isoindoline-1,3-dione (2h)**

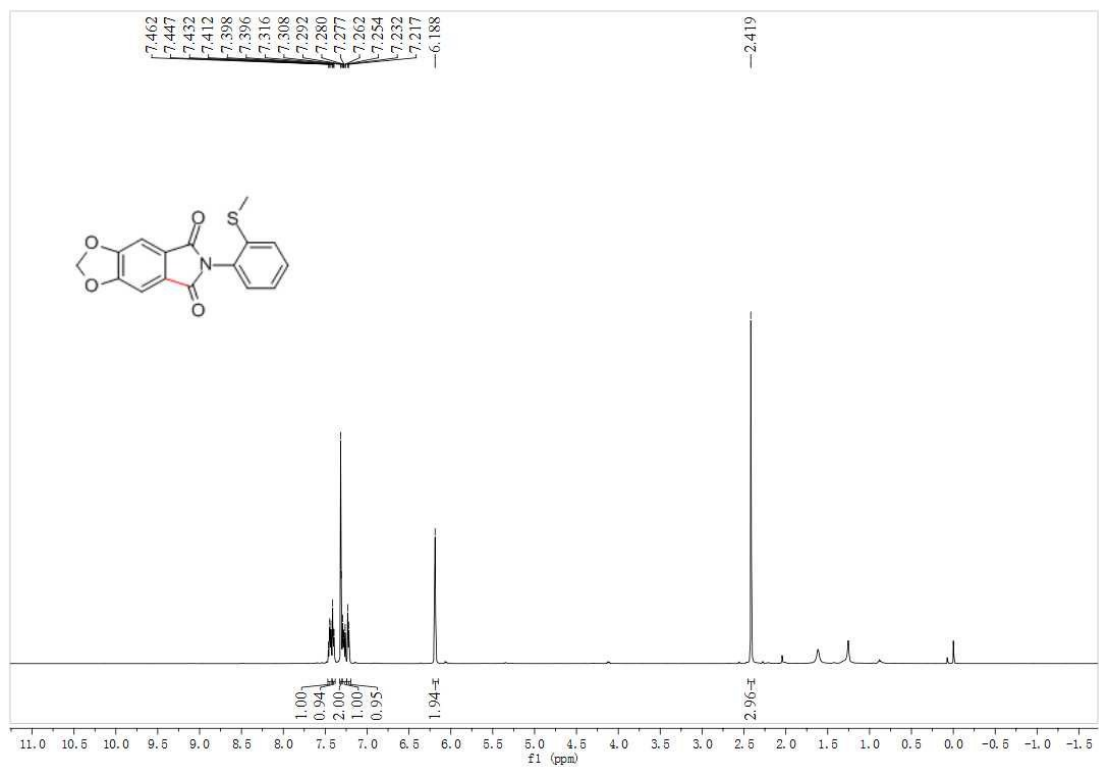

**<sup>1</sup>H NMR:** 6-(2-(methylthio)phenyl)-5H-[1,3]dioxolo[4,5-f]isoindole-5,7(6H)-dione (2i)

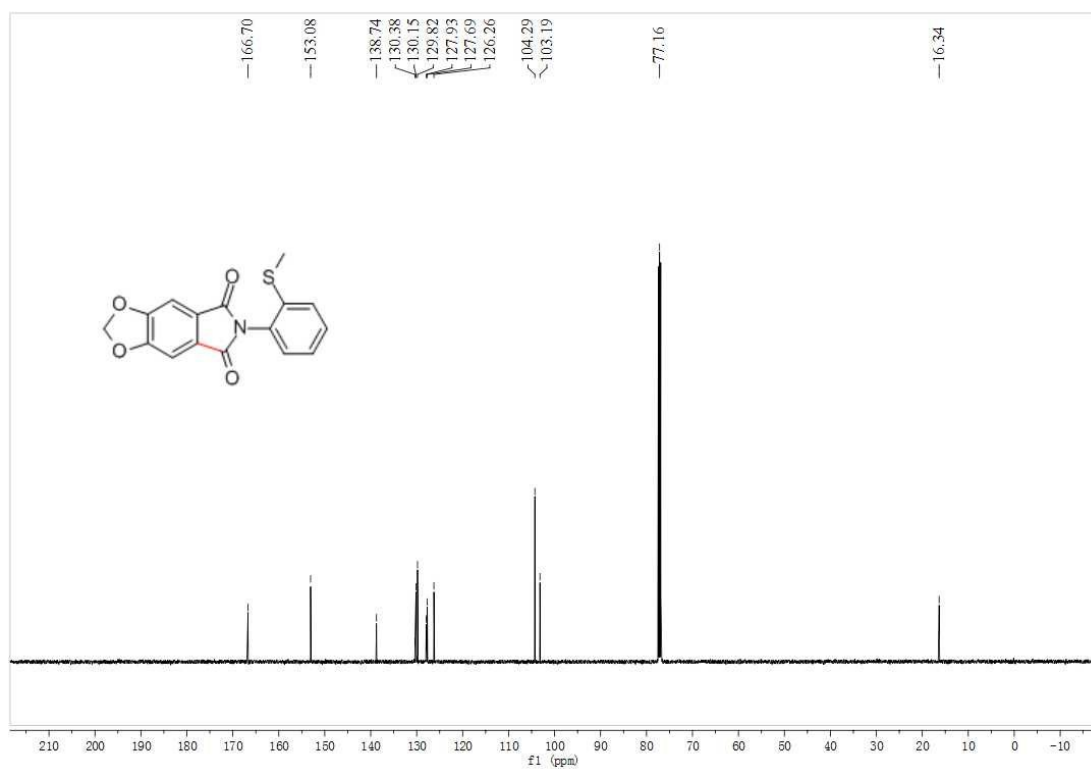

**<sup>13</sup>C NMR:** 6-(2-(methylthio)phenyl)-5H-[1,3]dioxolo[4,5-f]isoindole-5,7(6H)-dione (2i)

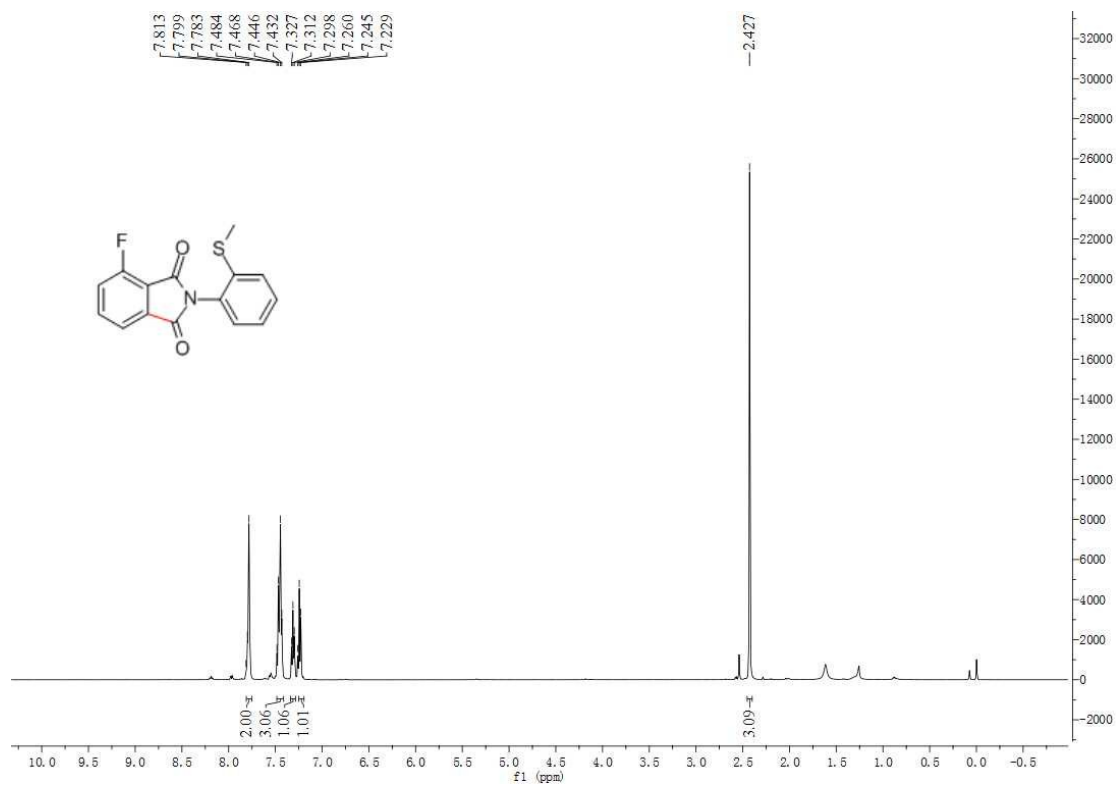

**<sup>1</sup>H NMR: 4-fluoro-2-(2-(methylthio)phenyl)isoindoline-1,3-dione (2j)**

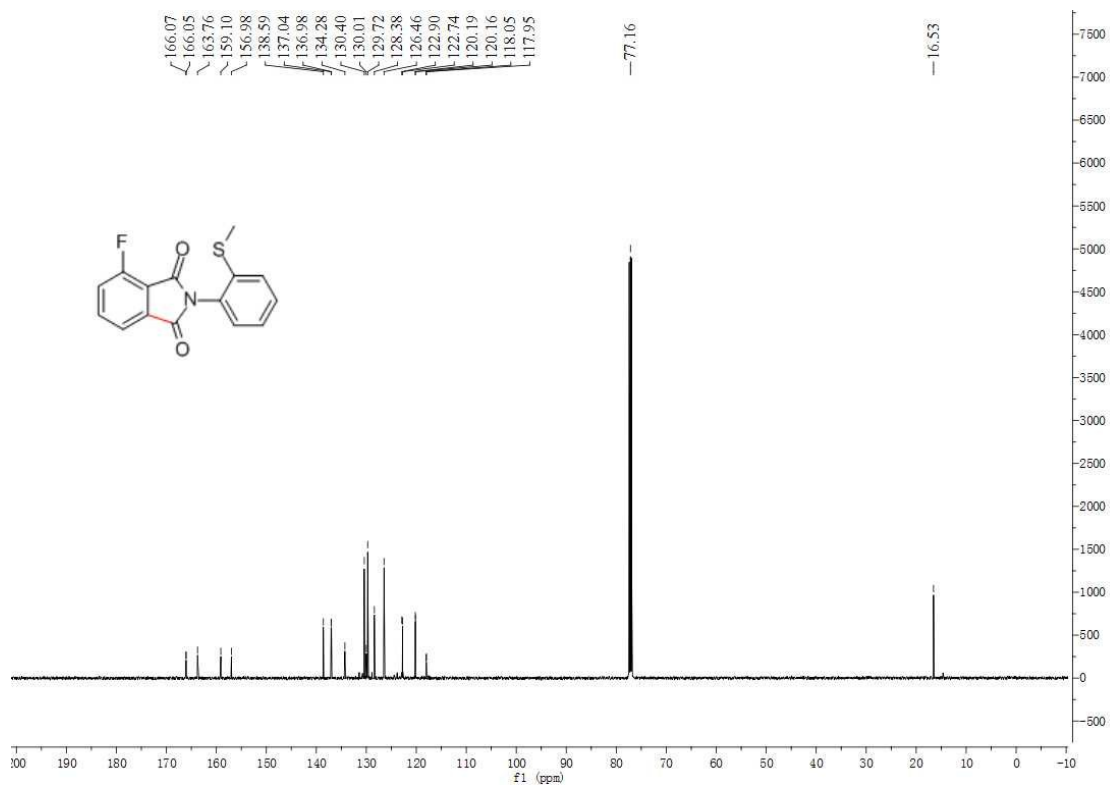

**<sup>13</sup>C NMR: 4-fluoro-2-(2-(methylthio)phenyl)isoindoline-1,3-dione (2j)**



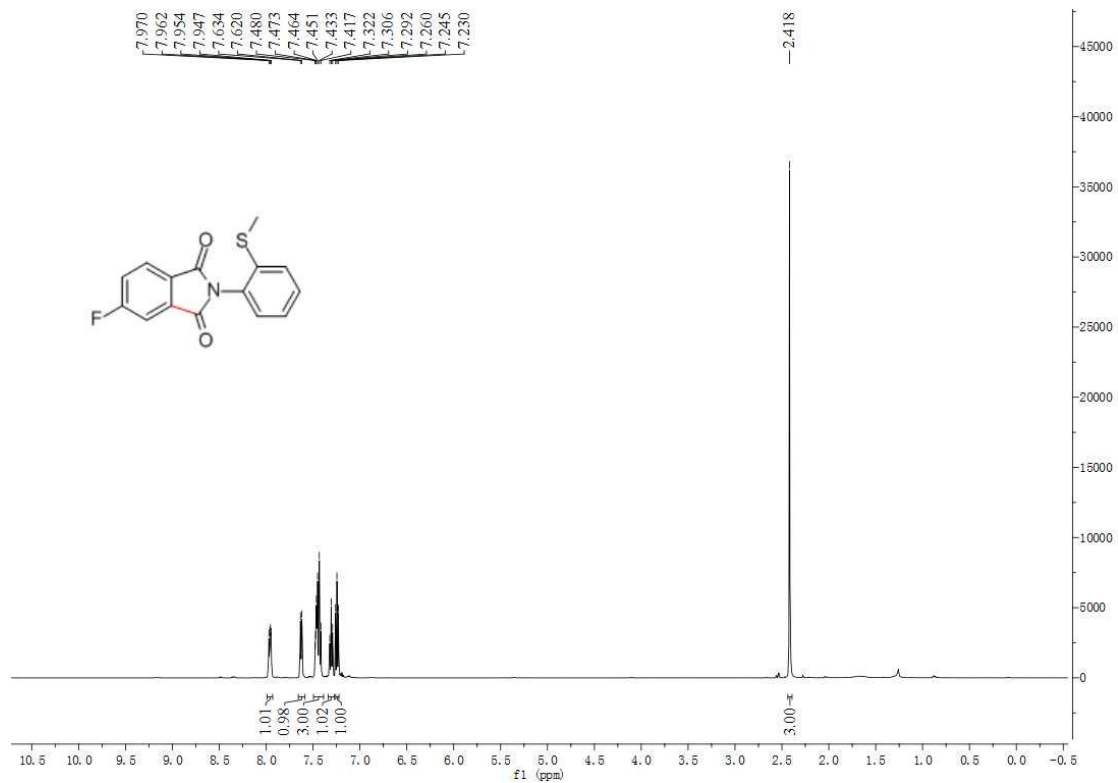

**<sup>1</sup>H NMR: 5-fluoro-2-(2-(methylthio)phenyl)isoindoline-1,3-dione (2k)**

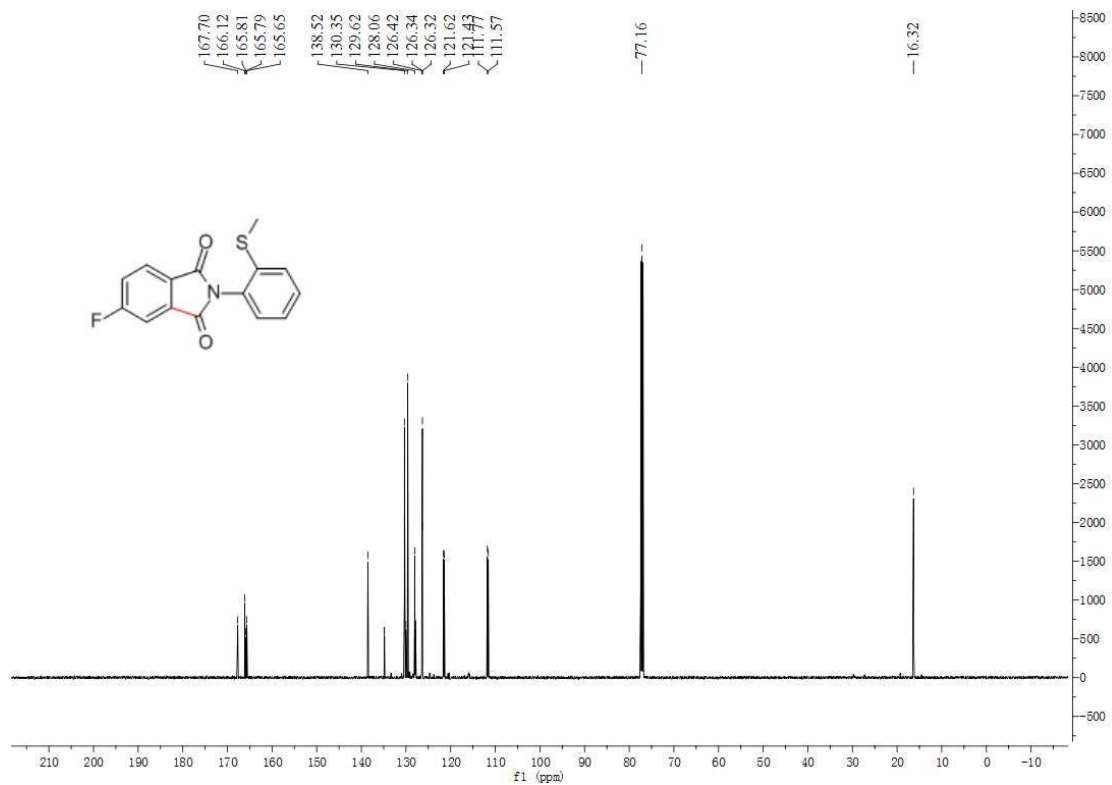

**<sup>13</sup>C NMR: 5-fluoro-2-(2-(methylthio)phenyl)isoindoline-1,3-dione (2k)**

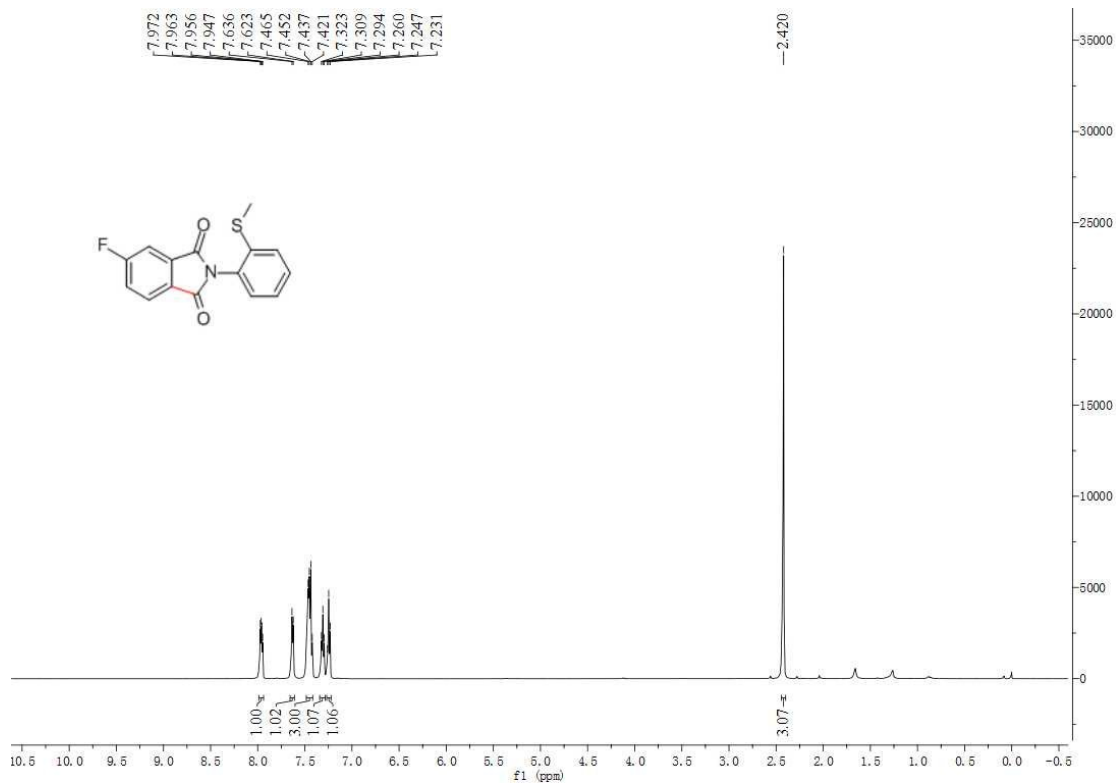

**<sup>1</sup>H NMR: 5-fluoro-2-(2-(methylthio)phenyl)isoindoline-1,3-dione (2l)**

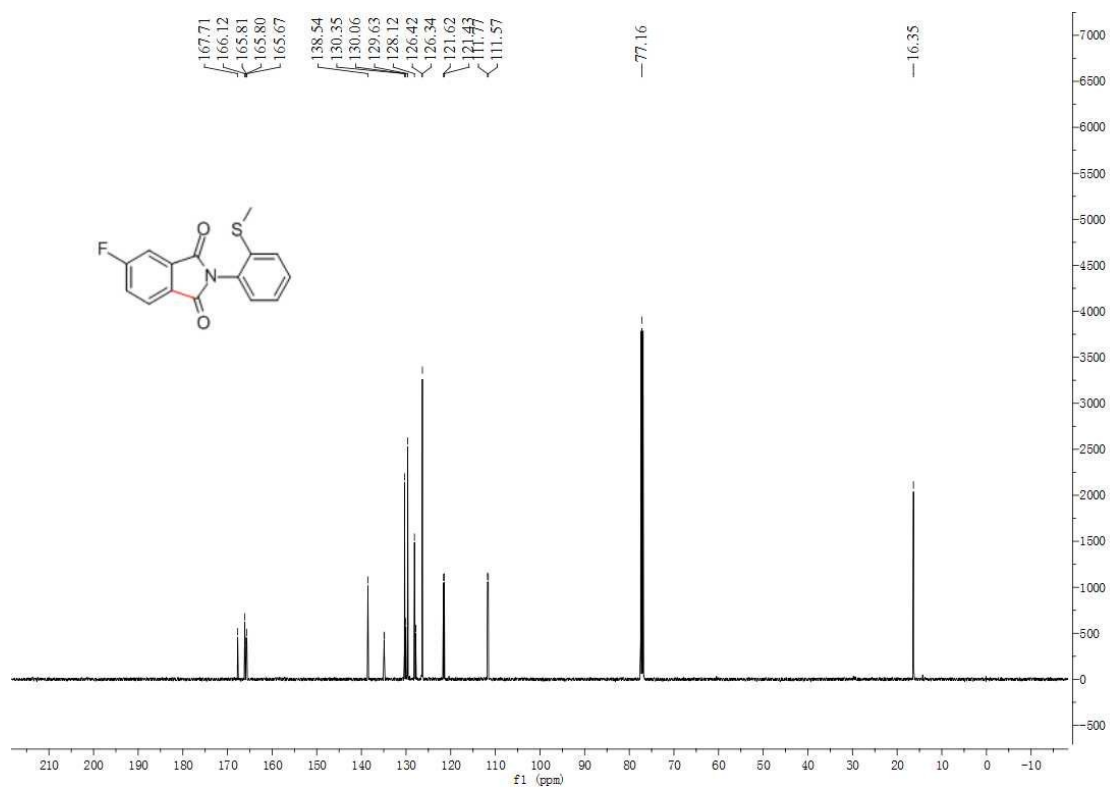

**<sup>13</sup>C NMR: 5-fluoro-2-(2-(methylthio)phenyl)isoindoline-1,3-dione (2l)**

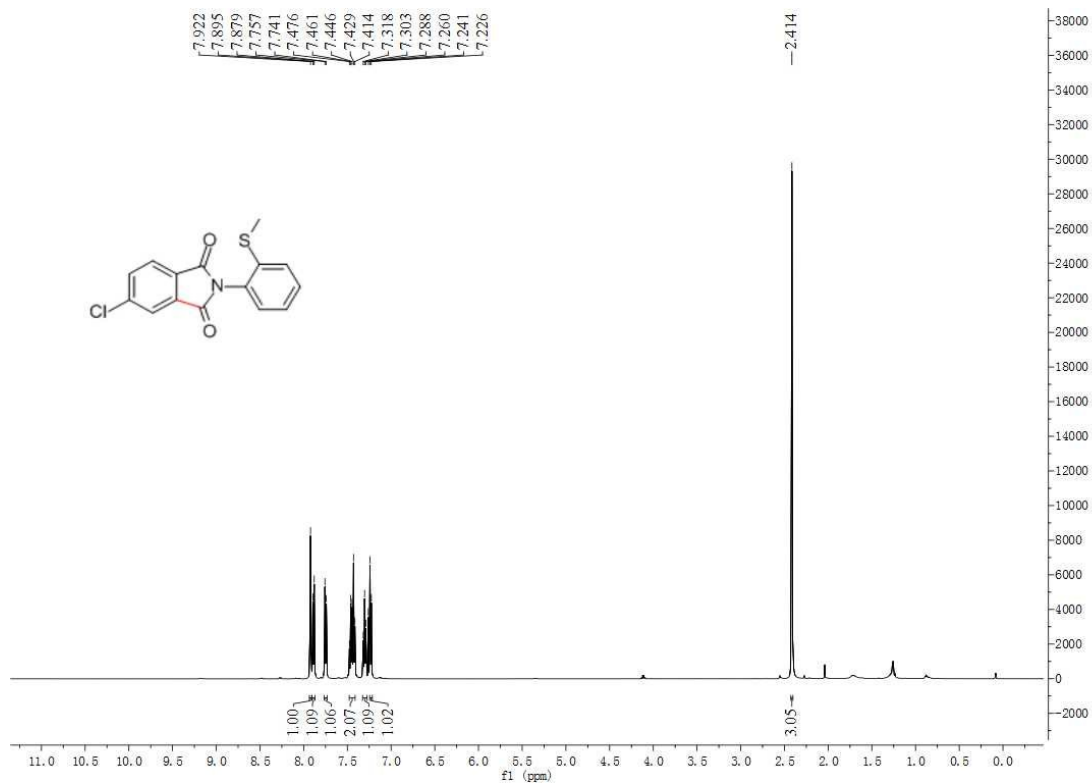

**<sup>1</sup>H NMR:5-chloro-2-(2-(methylthio)phenyl)isoindoline-1,3-dione (2m)**

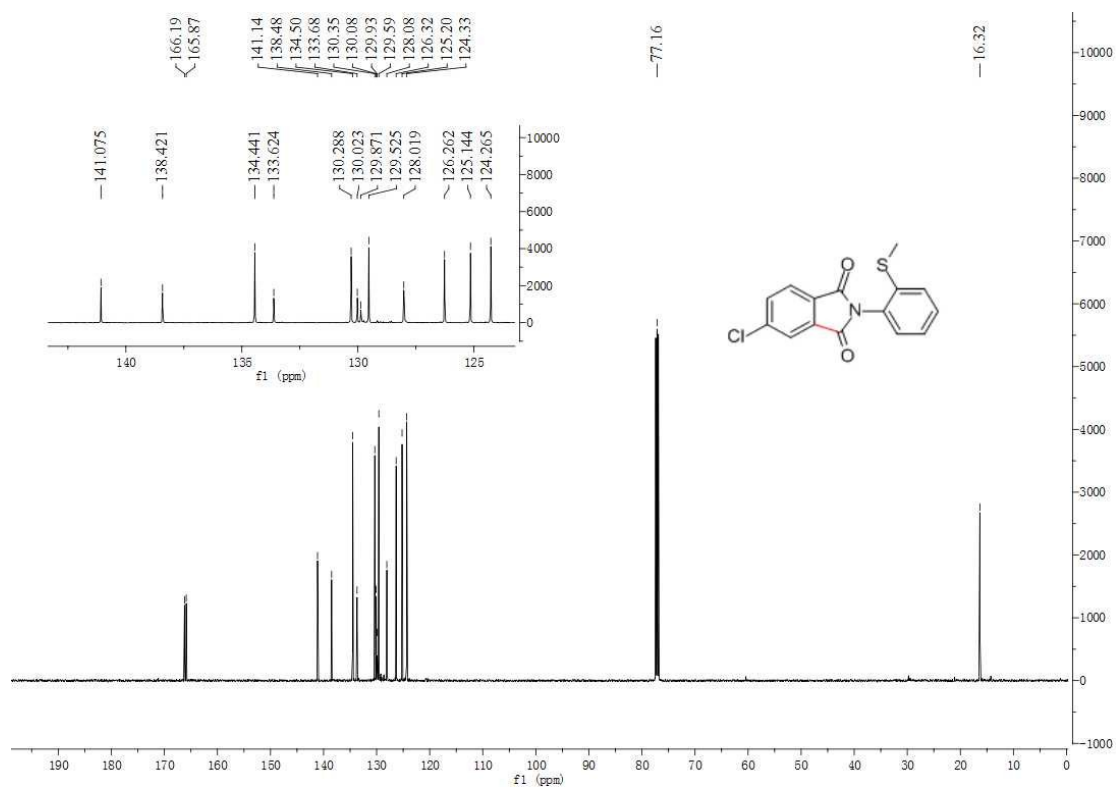

**<sup>13</sup>C NMR:5-chloro-2-(2-(methylthio)phenyl)isoindoline-1,3-dione (2m)**

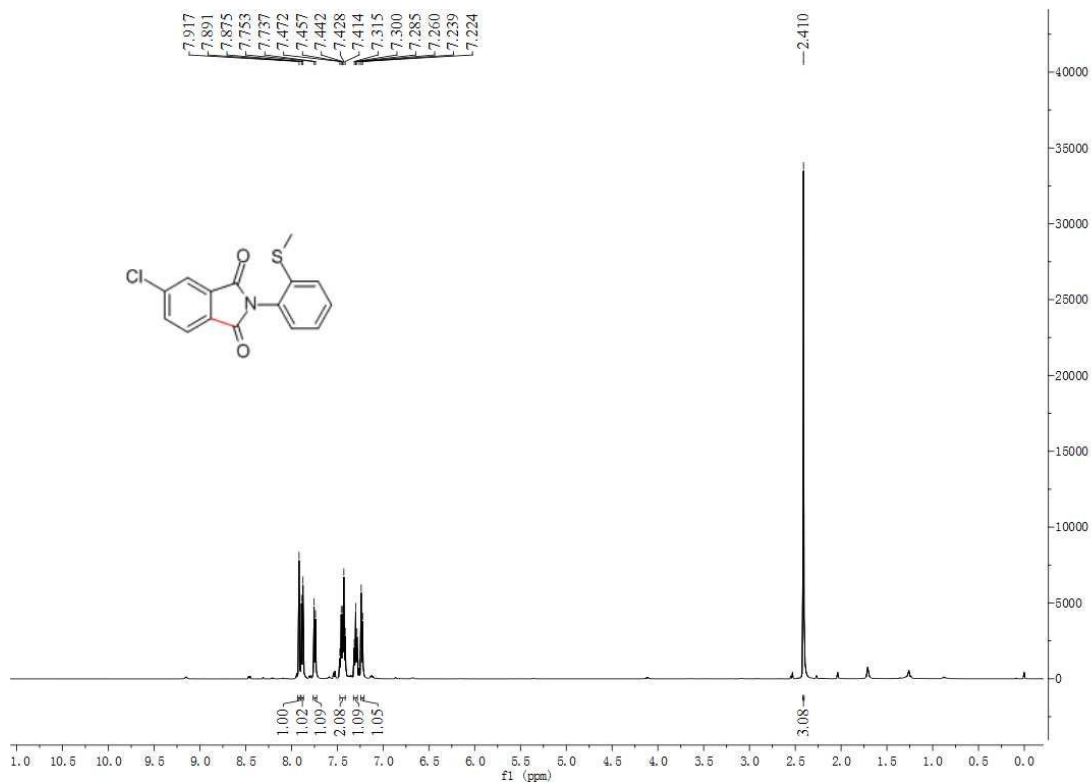

**<sup>1</sup>H NMR: 5-chloro-2-(2-(methylthio)phenyl)isoindoline-1,3-dione (2n)**

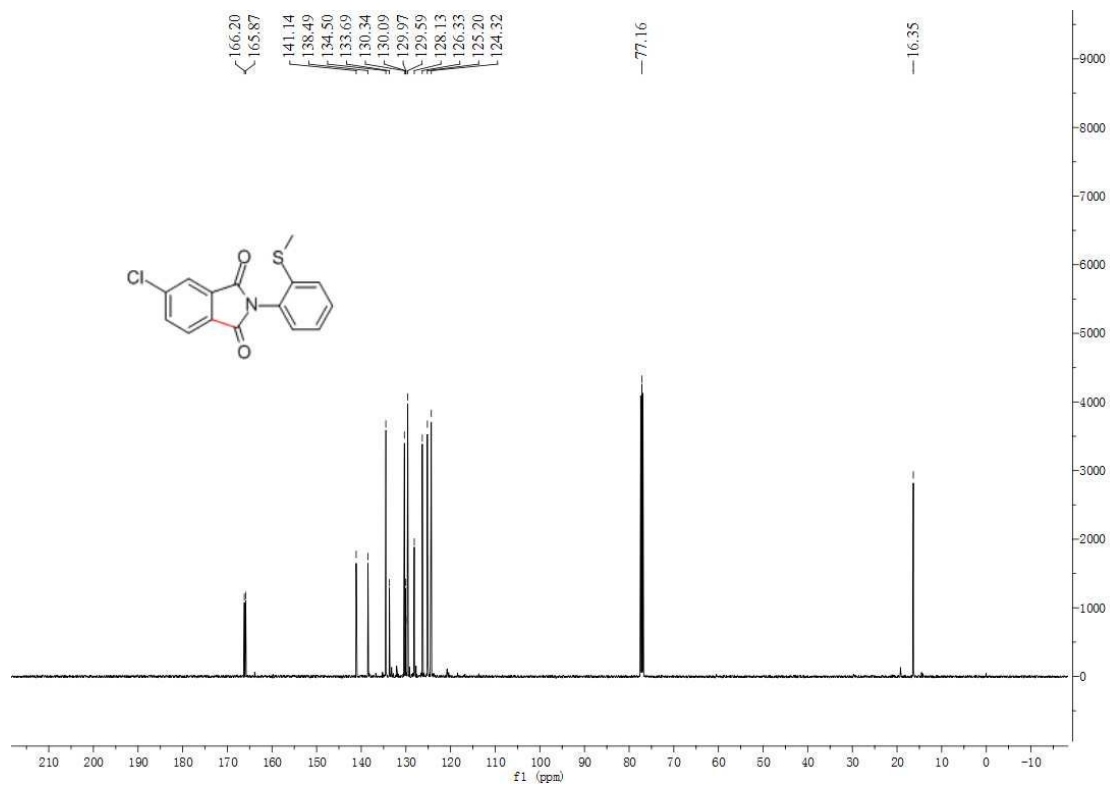

**<sup>13</sup>C NMR: 5-chloro-2-(2-(methylthio)phenyl)isoindoline-1,3-dione (2n)**

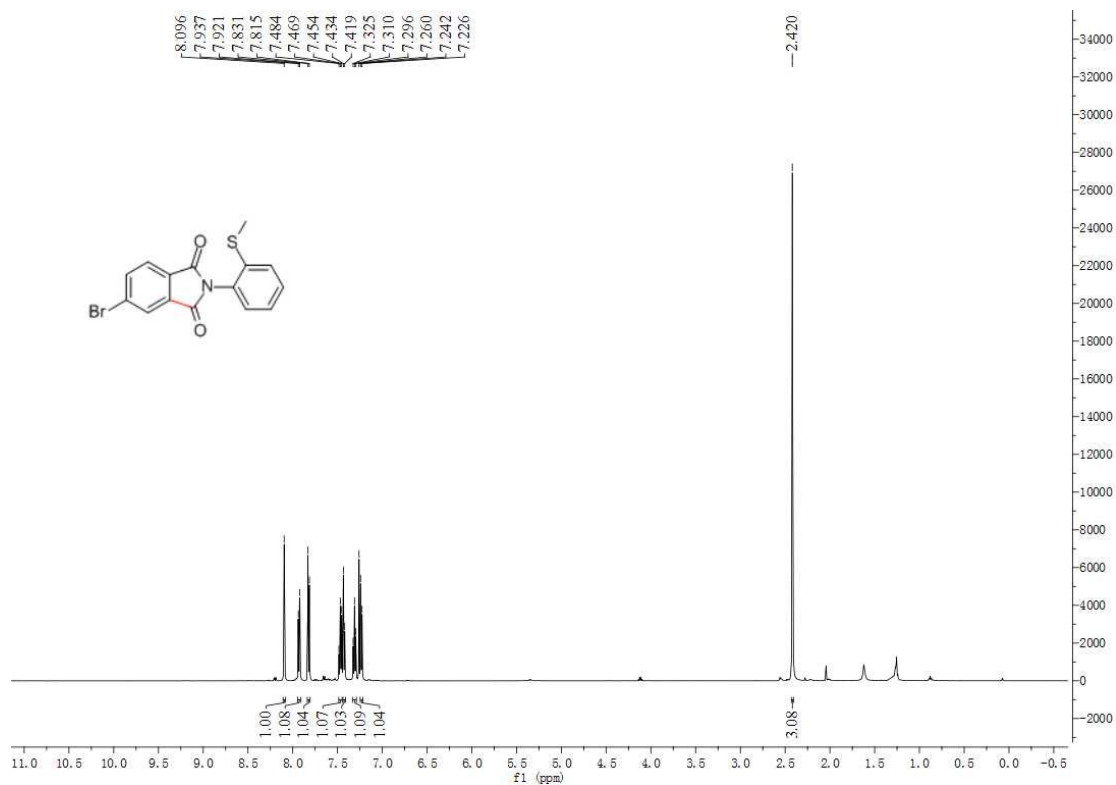

**<sup>1</sup>H NMR: 5-bromo-2-(2-(methylthio)phenyl)isoindoline-1,3-dione (2o)**

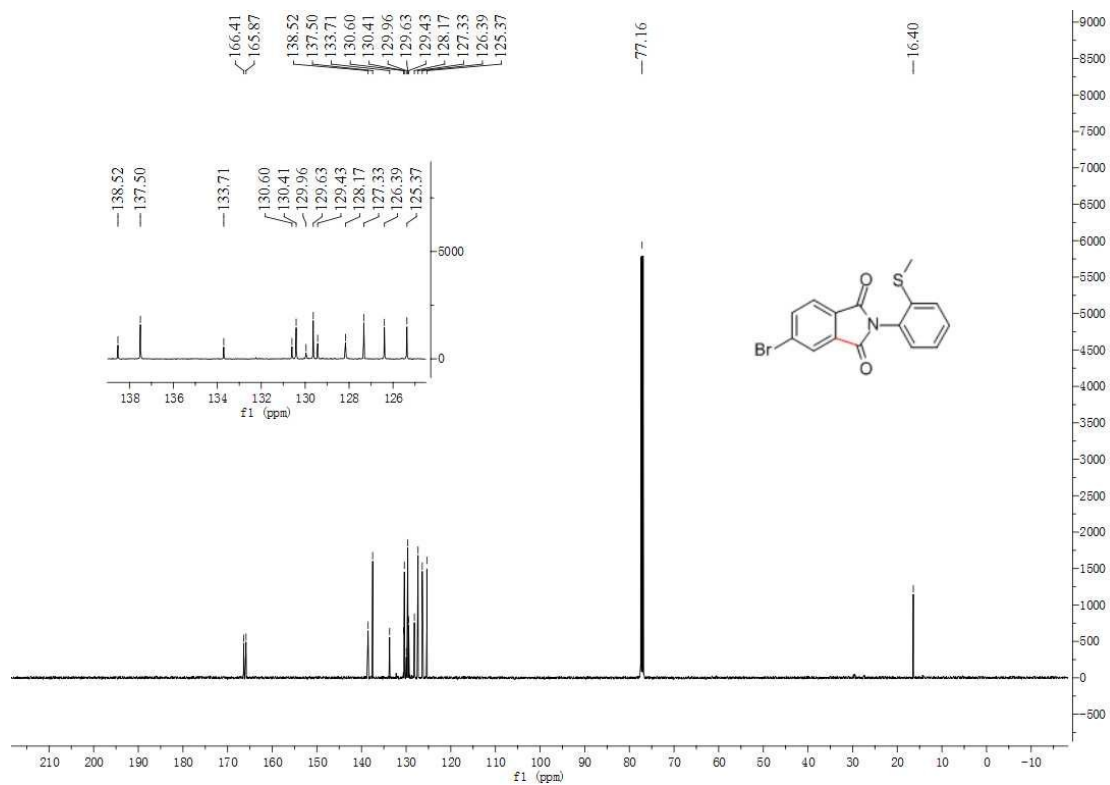

**<sup>13</sup>C NMR: 5-bromo-2-(2-(methylthio)phenyl)isoindoline-1,3-dione (2o)**

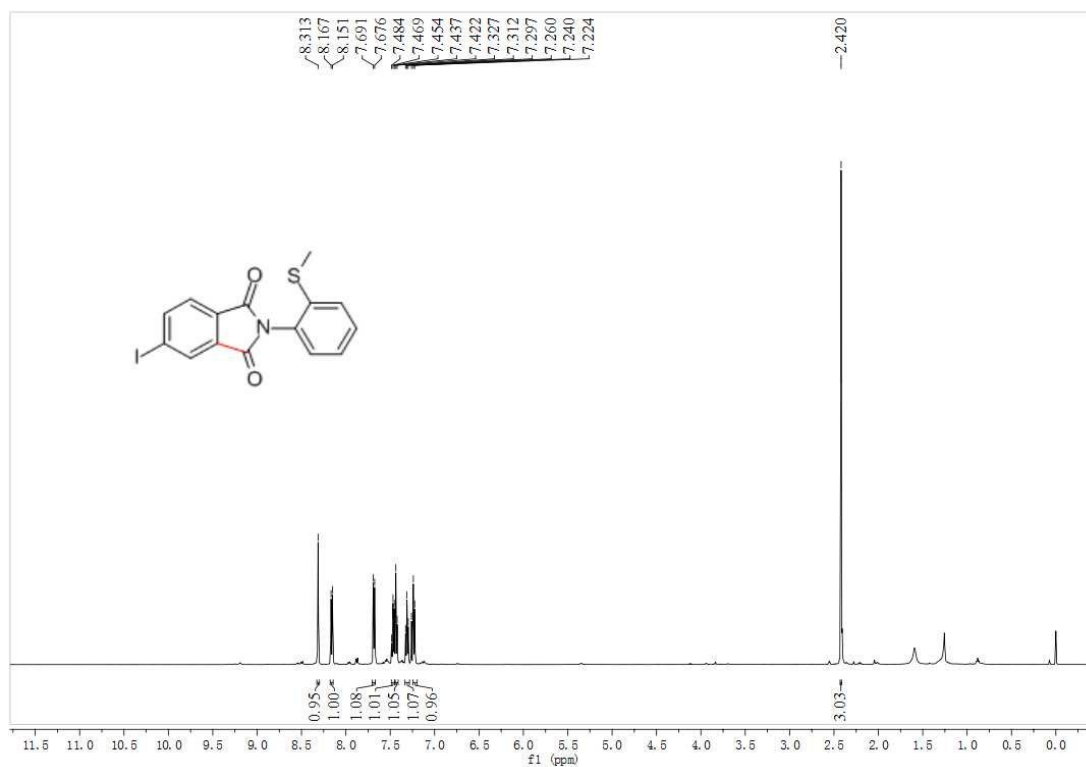

**<sup>1</sup>H NMR: 5-iodo-2-(2-(methylthio)phenyl)isoindoline-1,3-dione (2p)**

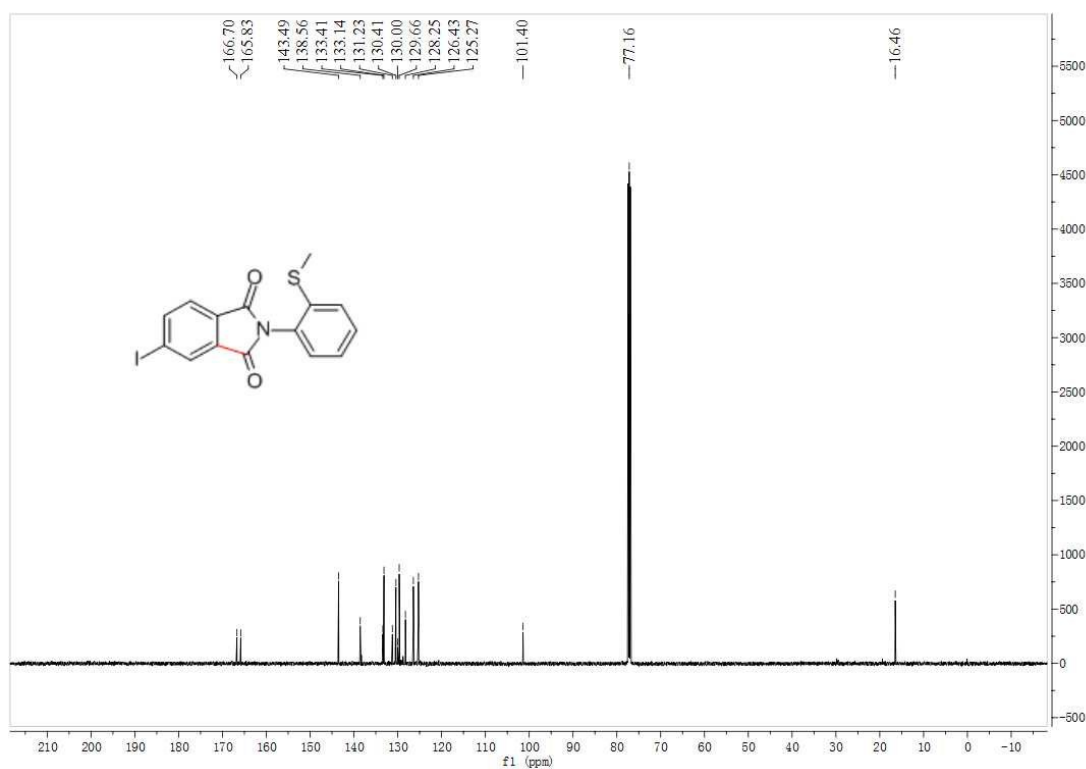

**<sup>13</sup>C NMR: 5-iodo-2-(2-(methylthio)phenyl)isoindoline-1,3-dione (2p)**

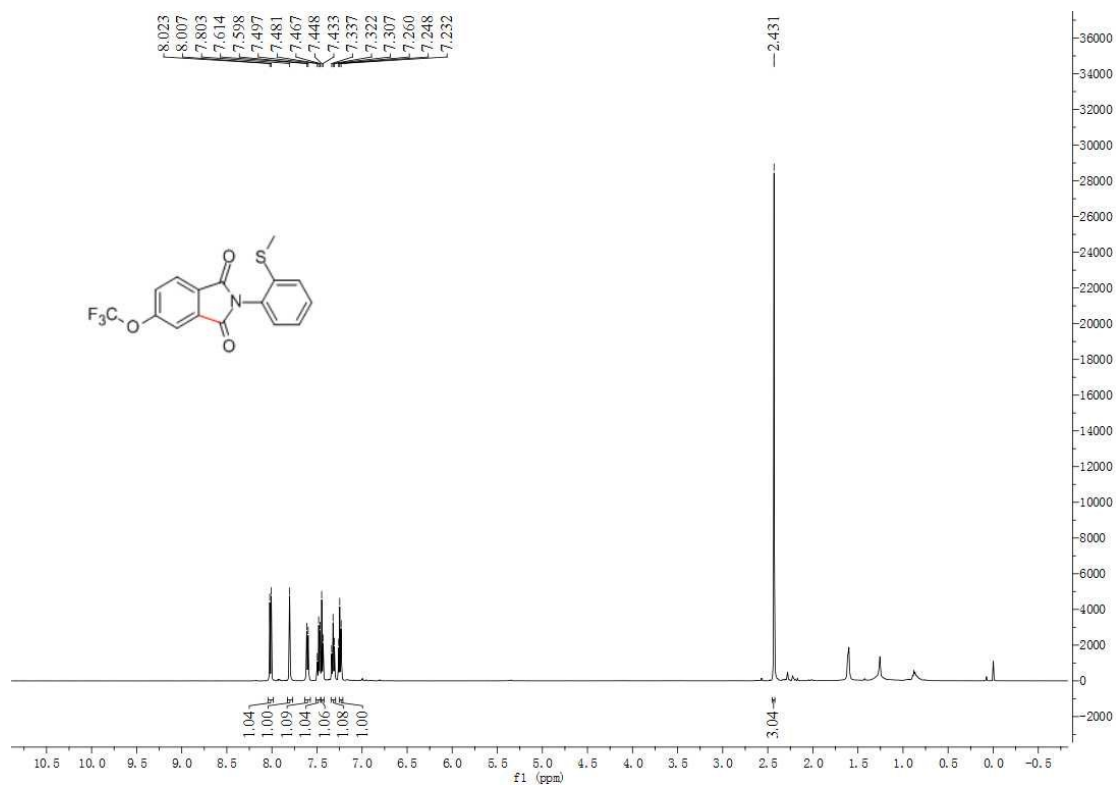

**<sup>1</sup>H NMR:** 2-(2-(methylthio)phenyl)-5-(trifluoromethoxy)isoindoline-1,3-dione (2q)

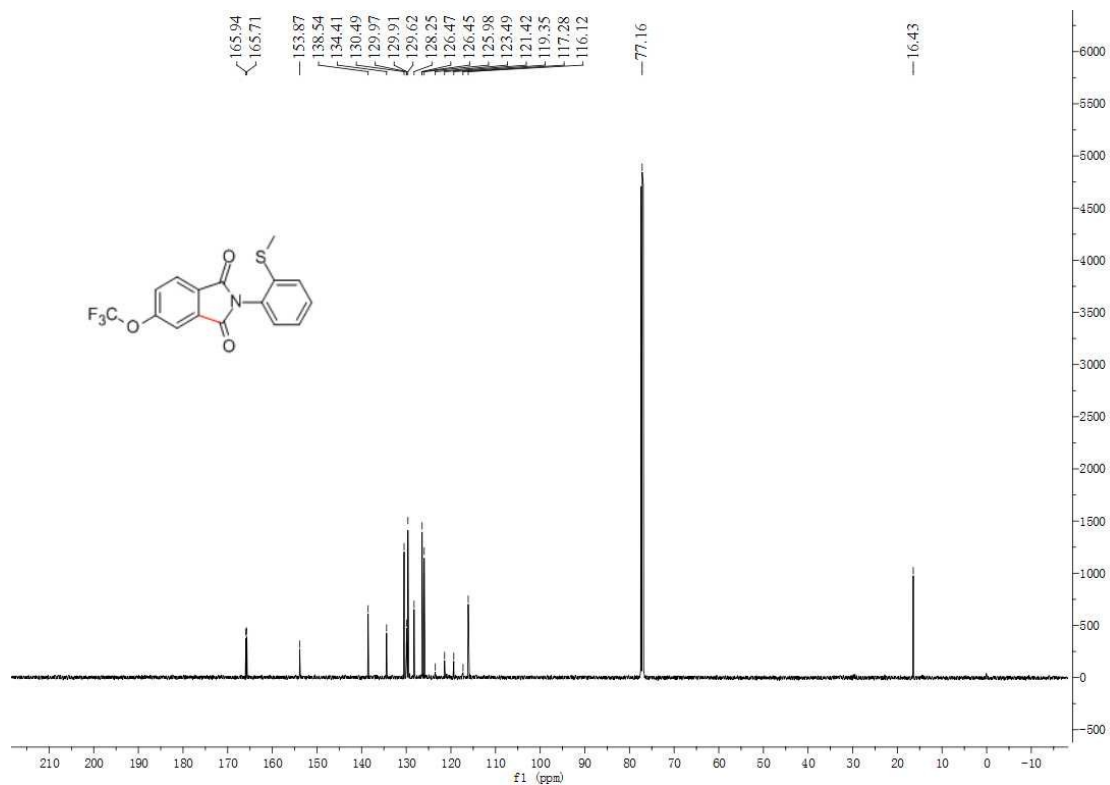

**<sup>13</sup>C NMR:** 2-(2-(methylthio)phenyl)-5-(trifluoromethoxy)isoindoline-1,3-dione (2q)

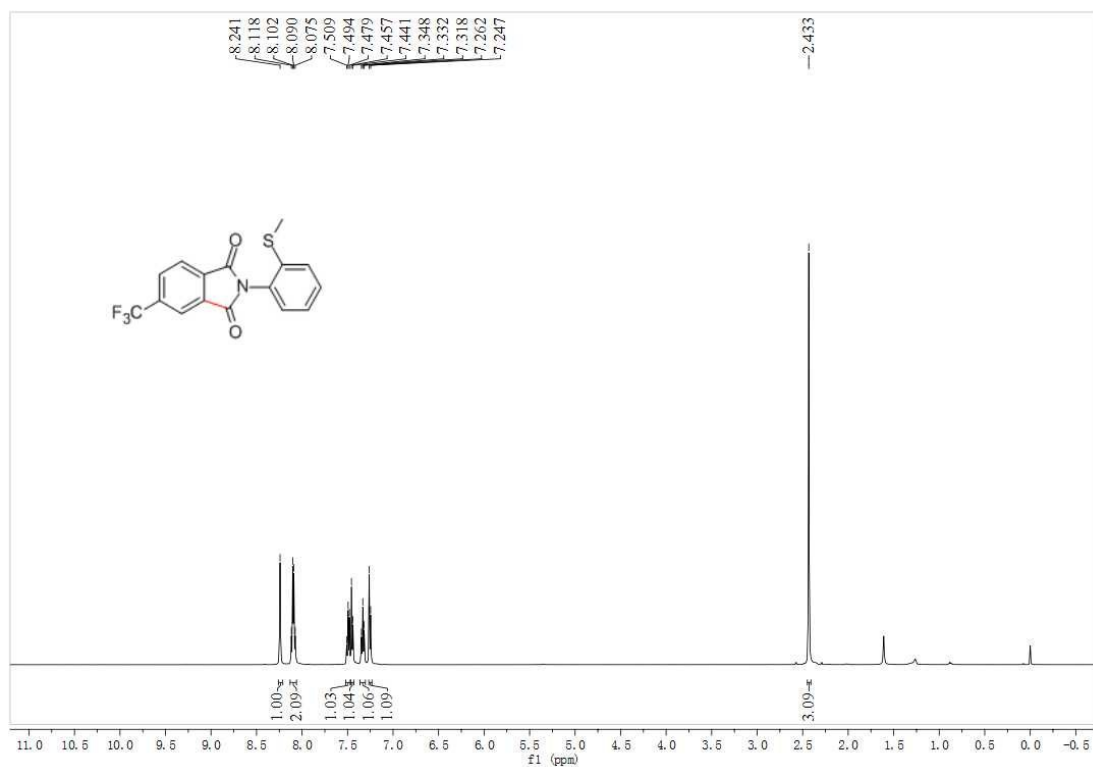

**<sup>1</sup>H NMR**: 2-(2-(methylthio)phenyl)-5-(trifluoromethyl)isoindoline-1,3-dione (2r)

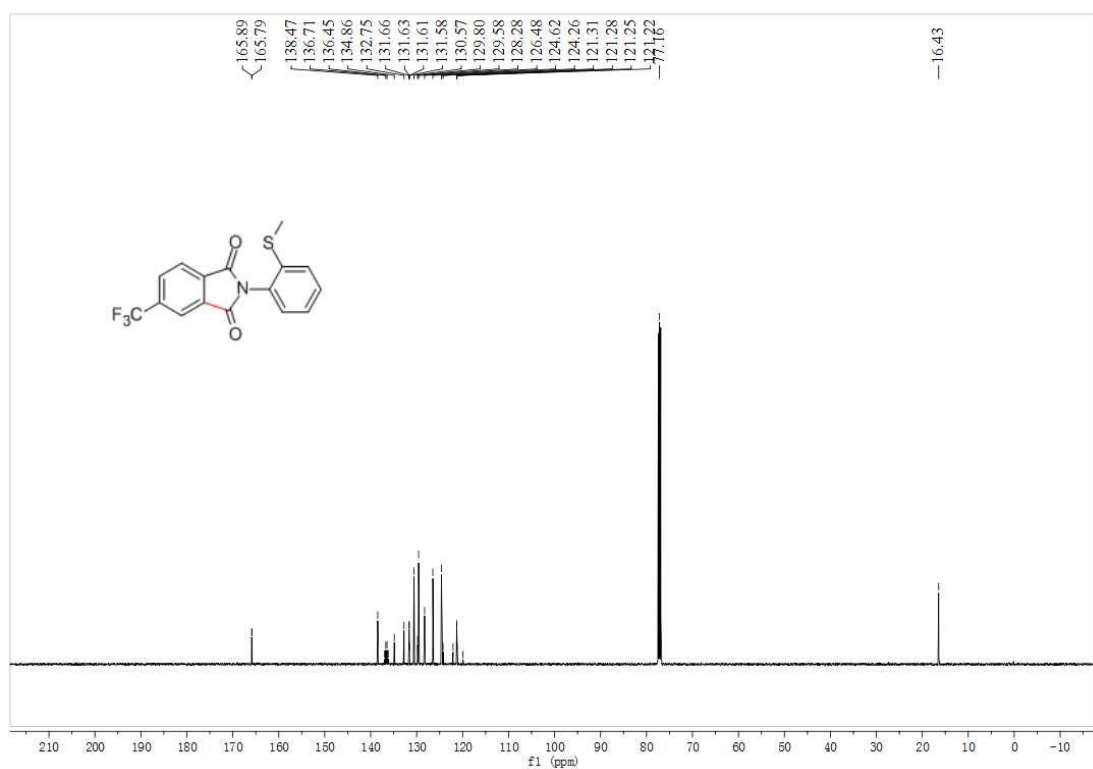

**<sup>13</sup>C NMR**: 2-(2-(methylthio)phenyl)-5-(trifluoromethyl)isoindoline-1,3-dione (2r)



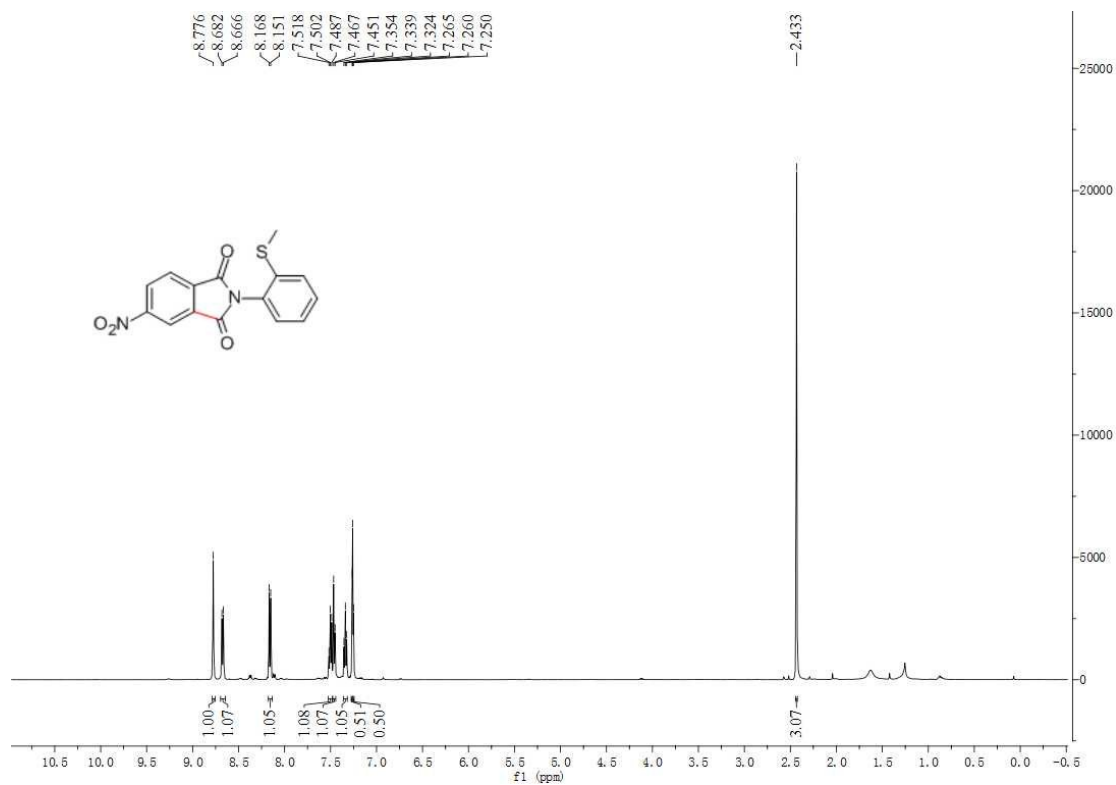

**<sup>1</sup>H NMR: 2-(2-(methylthio)phenyl)-5-nitroisindoline-1,3-dione (2s)**

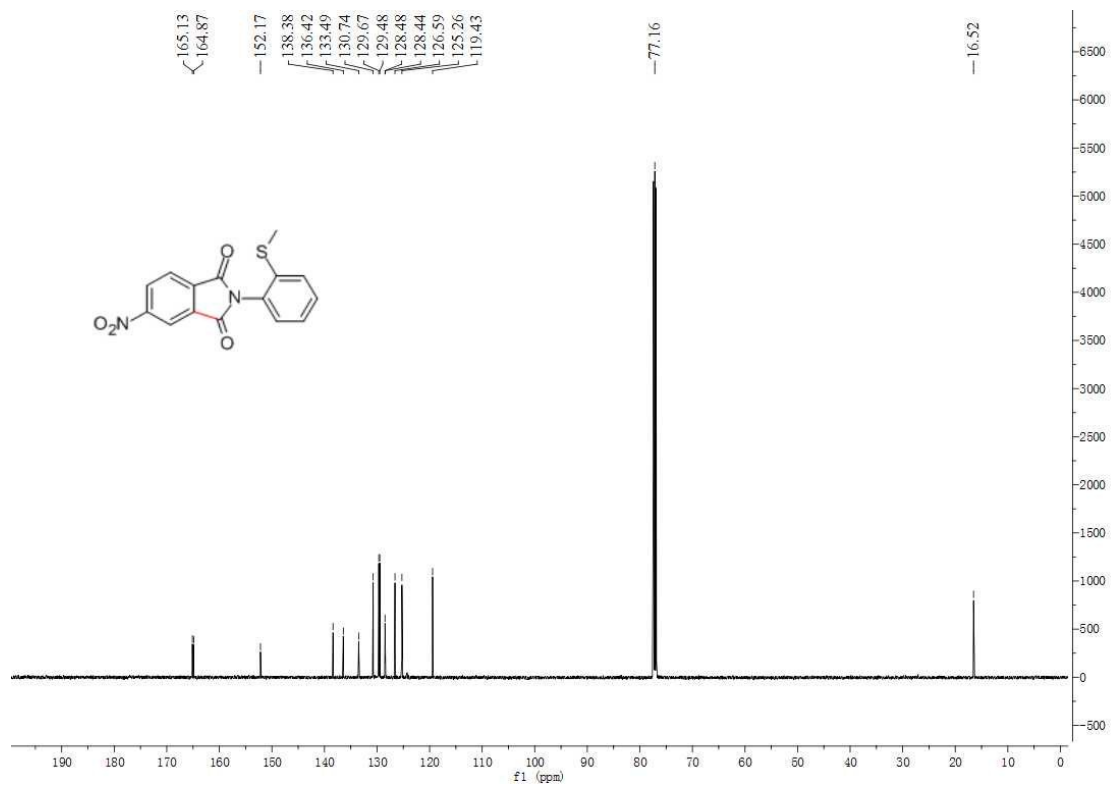

**<sup>13</sup>C NMR: 2-(2-(methylthio)phenyl)-5-nitroisindoline-1,3-dione (2s)**

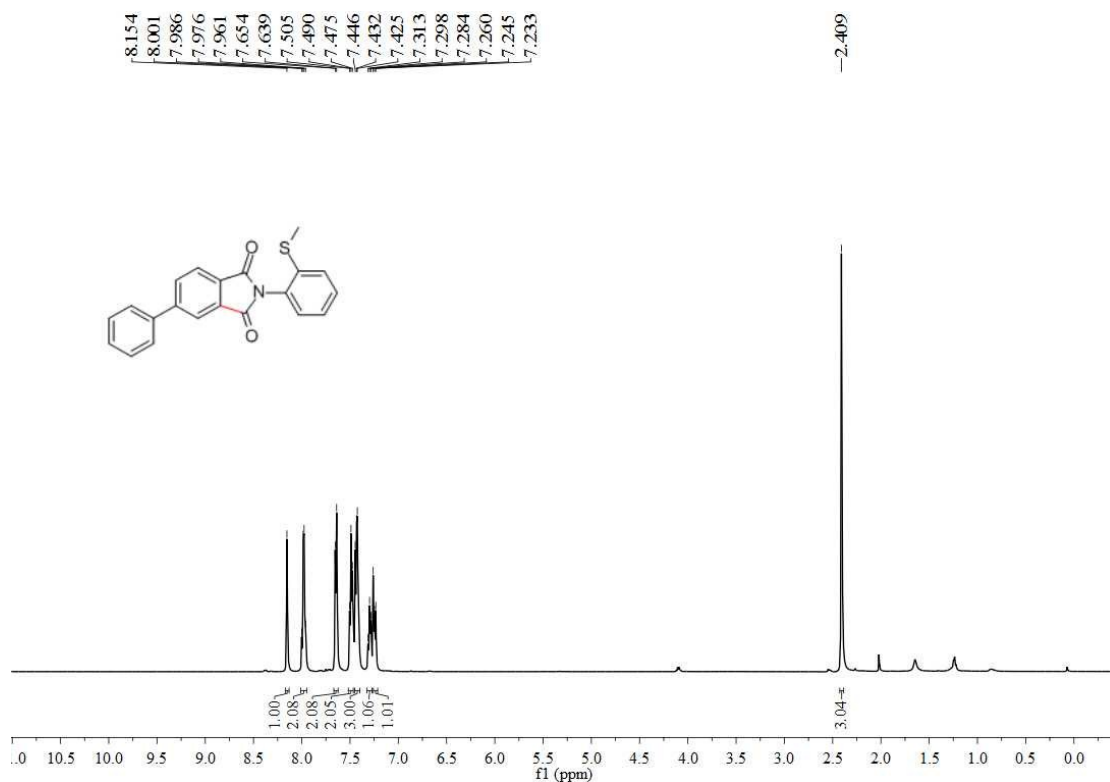

**<sup>1</sup>H NMR:** 2-(2-(methylthio)phenyl)-5-phenylisindoline-1,3-dione (2t)

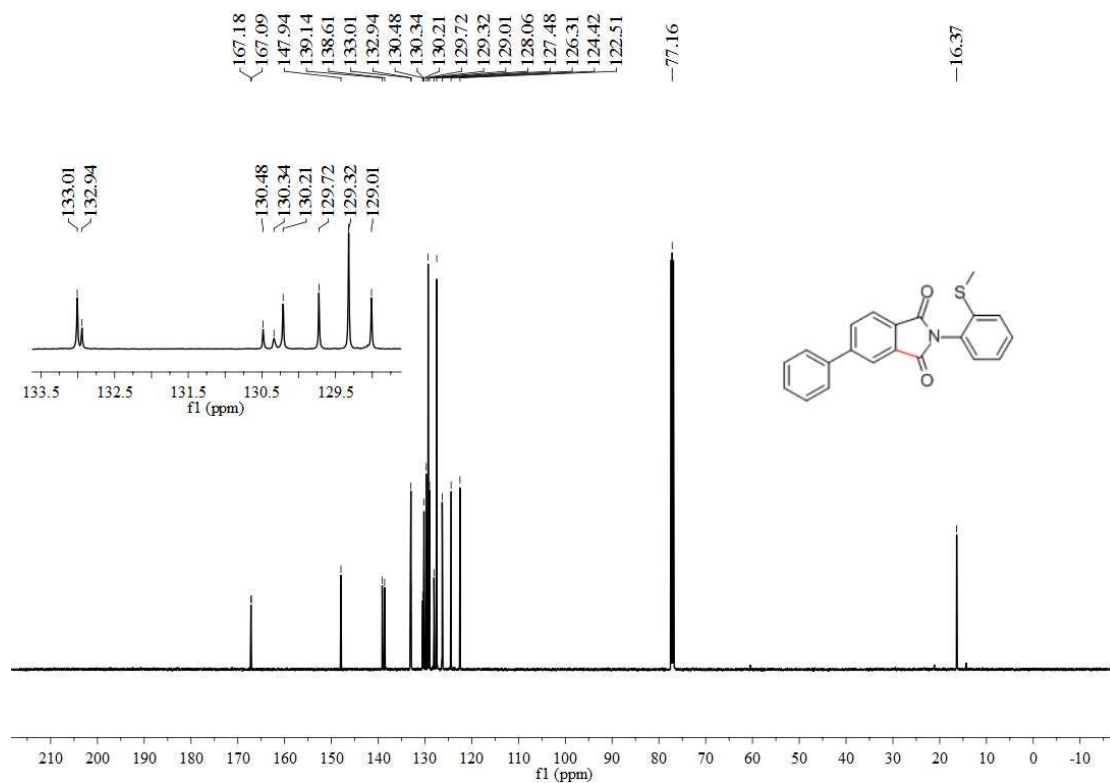

**<sup>13</sup>C NMR:** 2-(2-(methylthio)phenyl)-5-phenylisindoline-1,3-dione (2t)

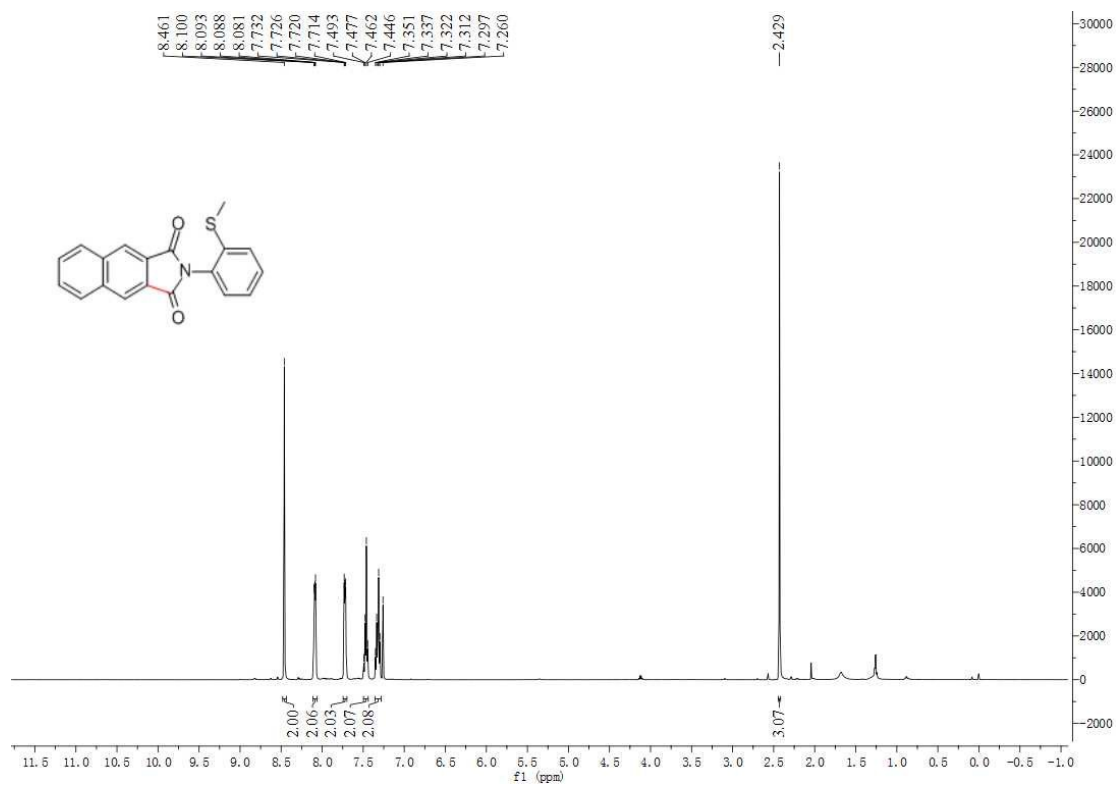

**<sup>1</sup>H NMR: 2-(2-(methylthio)phenyl)-1H-benzo[f]isoindole-1,3(2H)-dione (2u)**

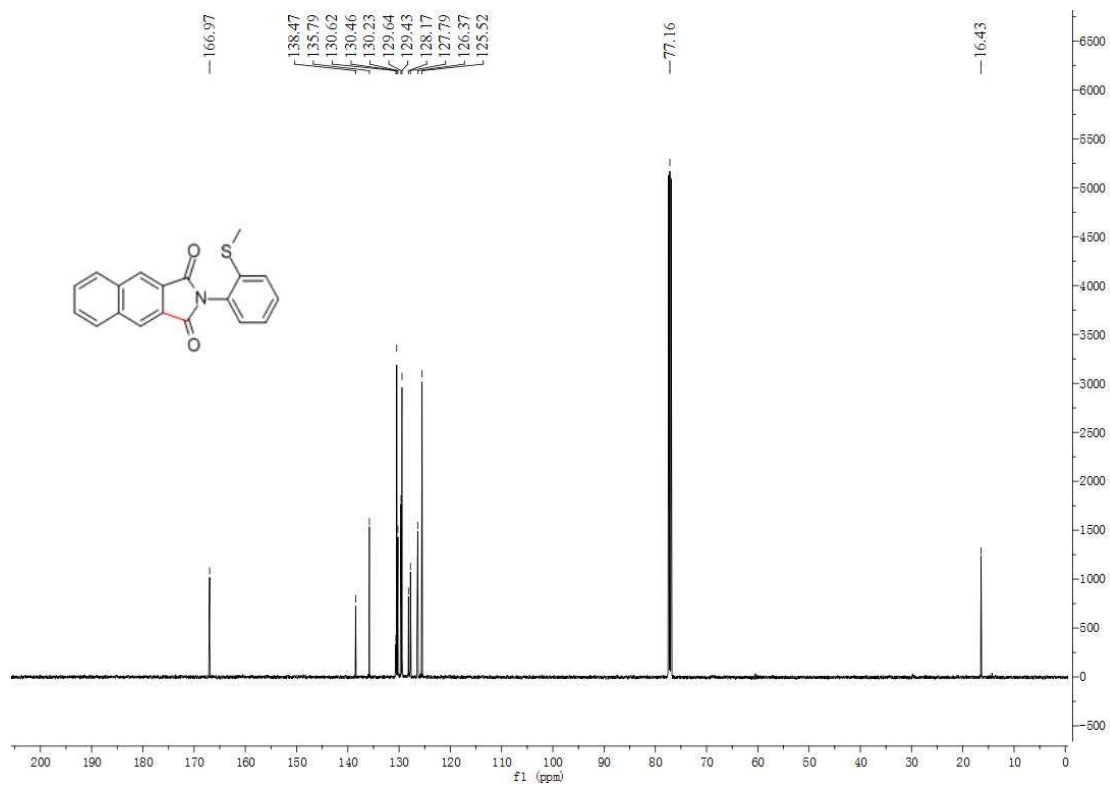

**<sup>13</sup>C NMR: 2-(2-(methylthio)phenyl)-1H-benzo[f]isoindole-1,3(2H)-dione (2u)**

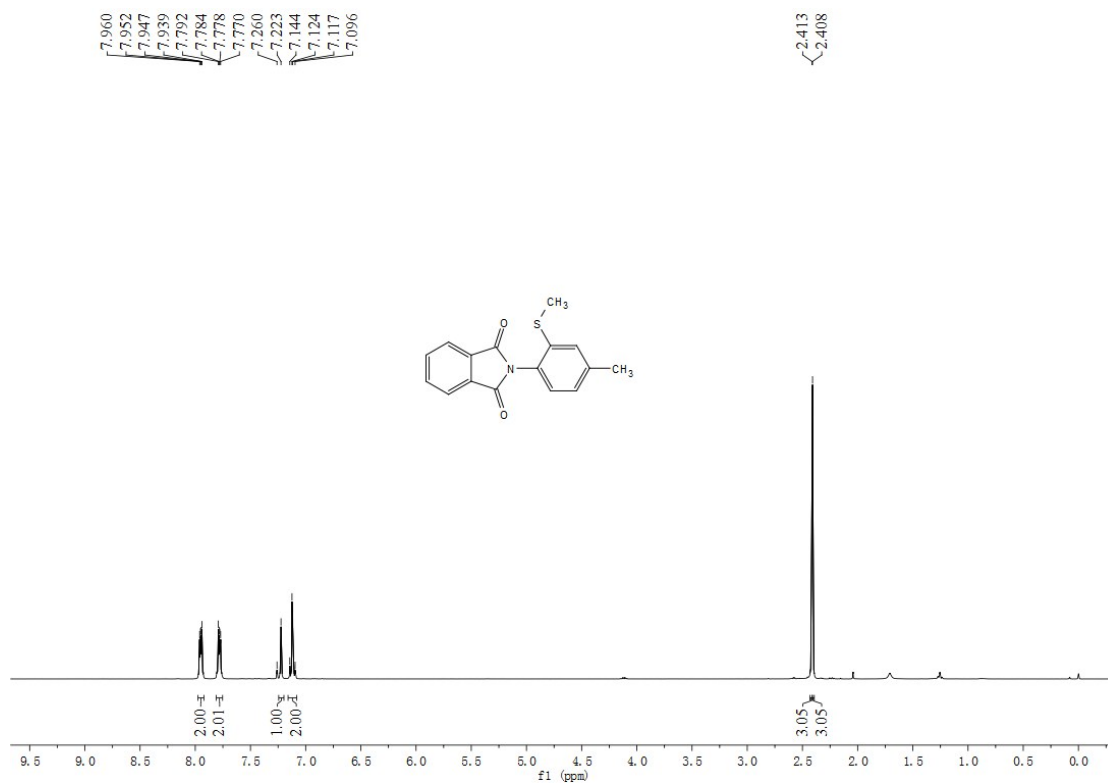

**<sup>1</sup>H NMR: 2-(4-methyl-2-(methylthio)phenyl)isoindoline-1,3-dione (4a)**

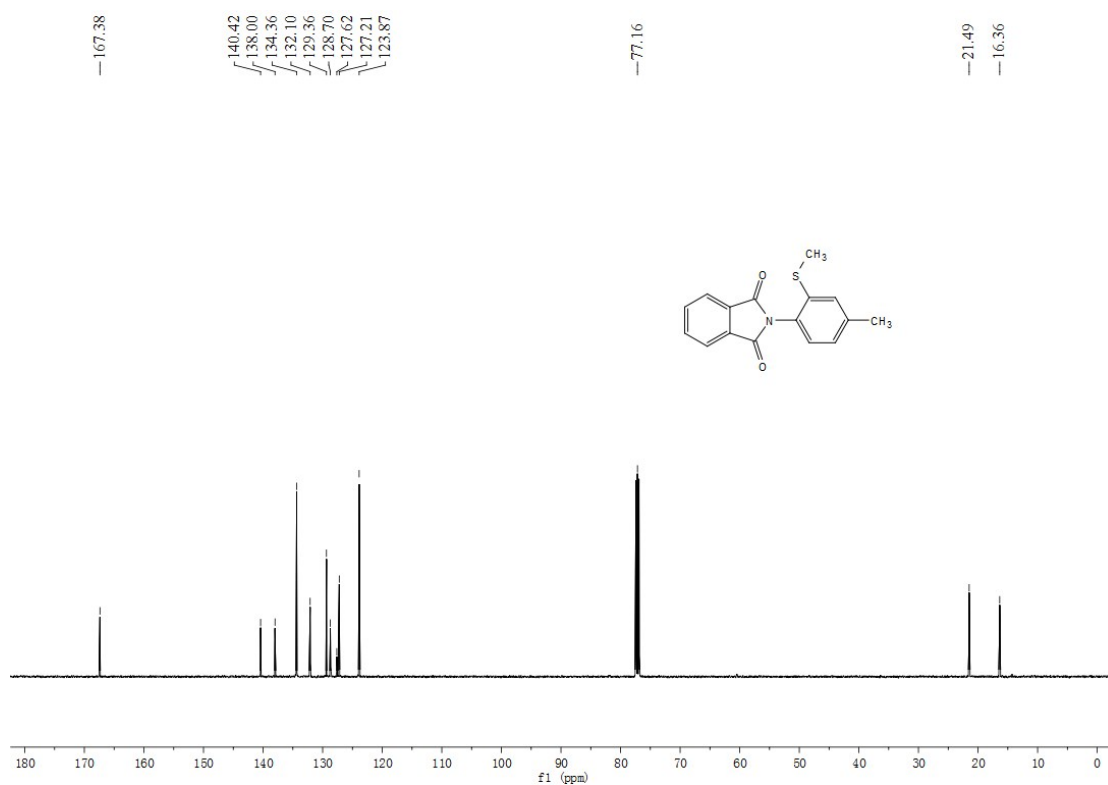

**<sup>13</sup>C NMR: 2-(4-methyl-2-(methylthio)phenyl)isoindoline-1,3-dione (4a)**

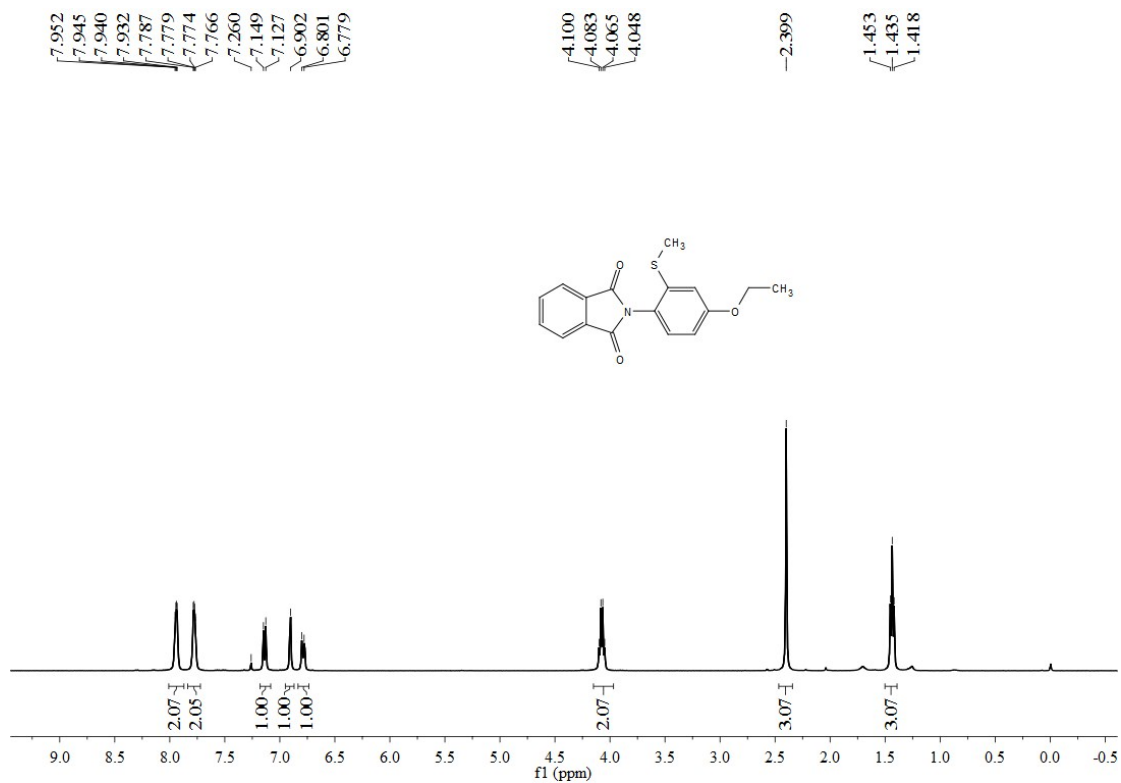

**<sup>1</sup>H NMR: 2-(4-ethoxy-2-(methylthio)phenyl)isoindoline-1,3-dione (4b)**

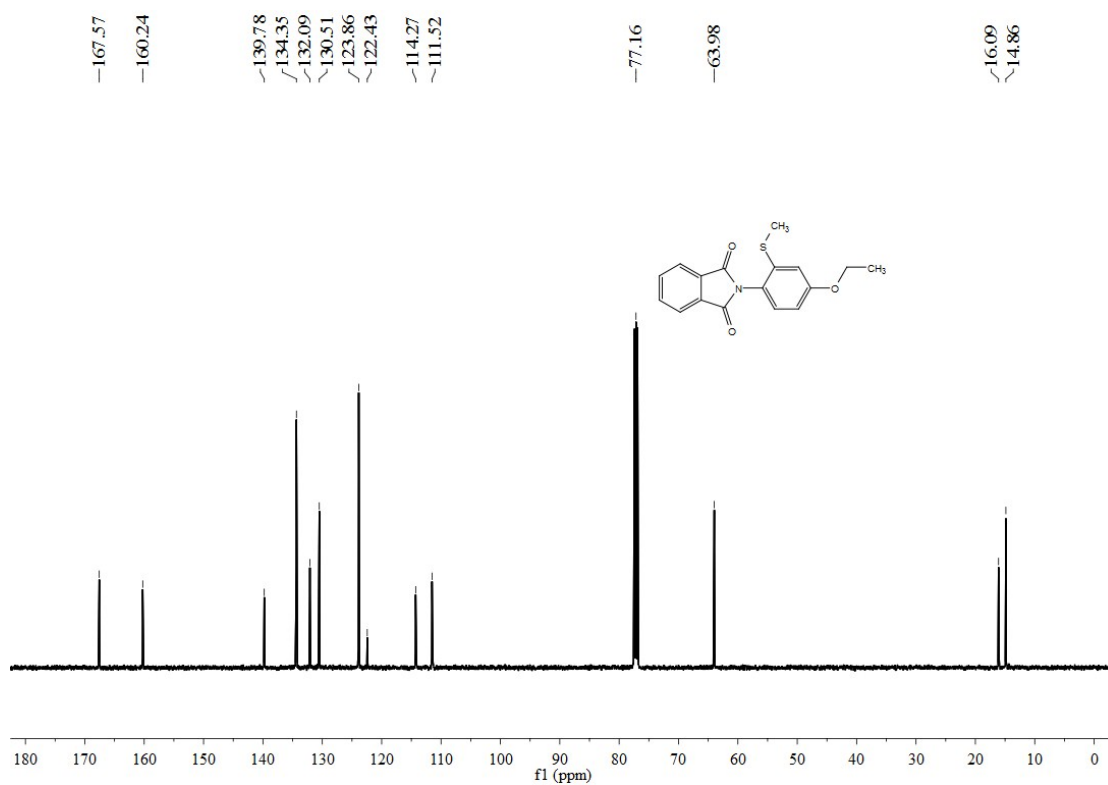

**<sup>13</sup>C NMR: 2-(4-ethoxy-2-(methylthio)phenyl)isoindoline-1,3-dione (4b)**

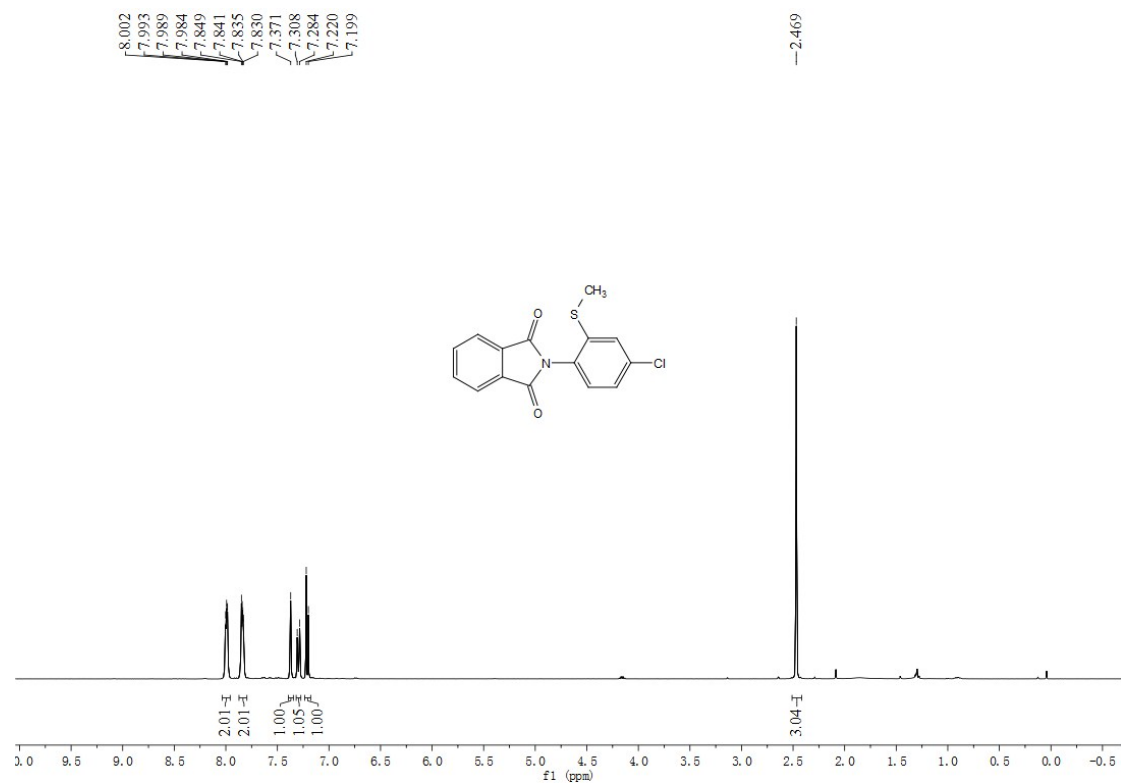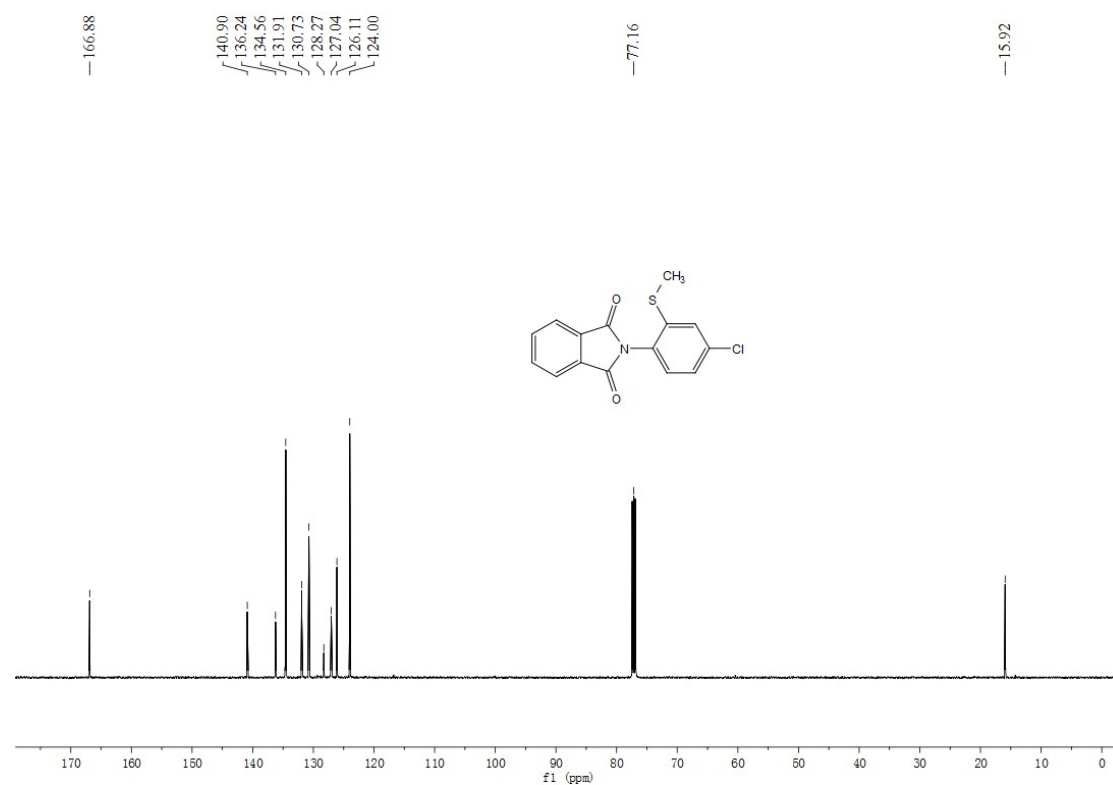

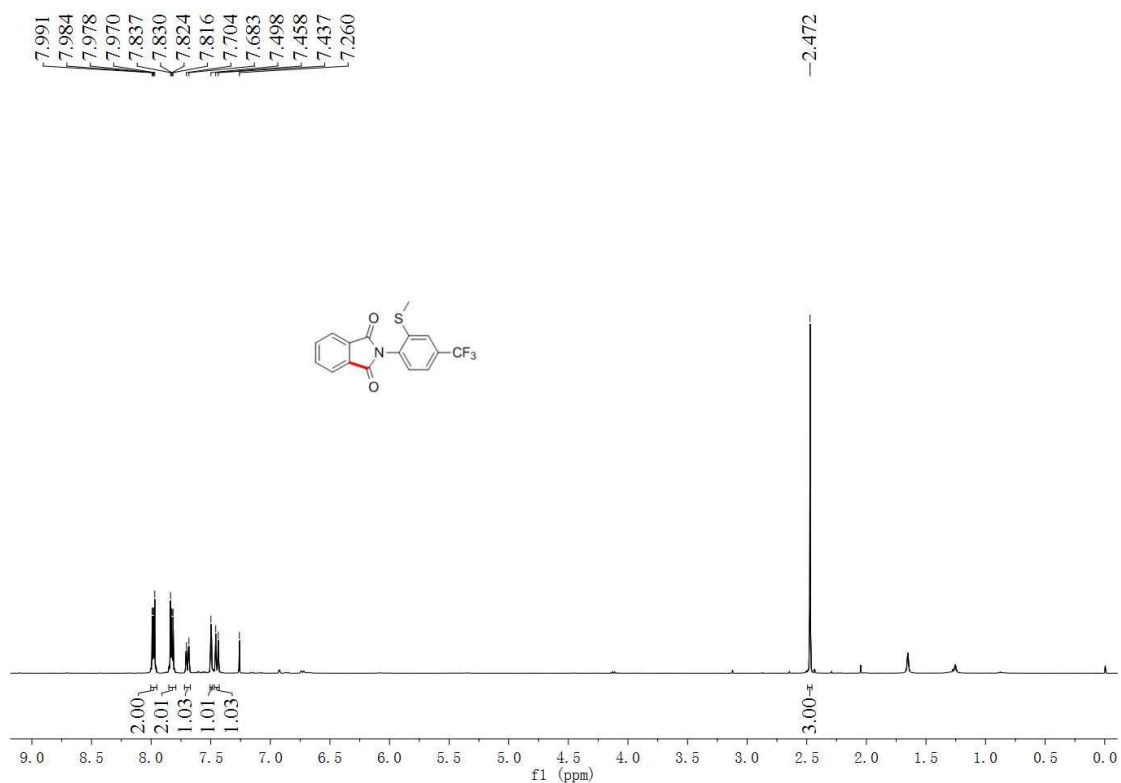

**<sup>1</sup>H NMR: 2-(2-(methylthio)-4-(trifluoromethyl)phenyl)isoindoline-1,3-dione (4d)**

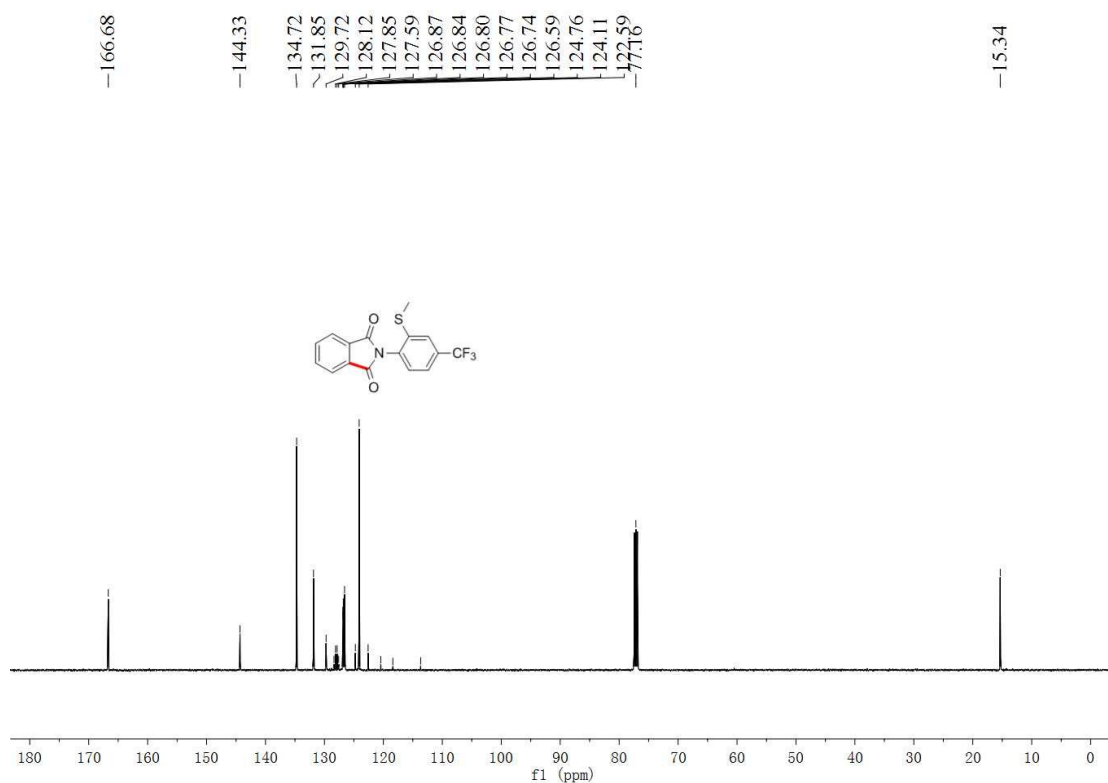

**<sup>13</sup>C NMR: 2-(2-(methylthio)-4-(trifluoromethyl)phenyl)isoindoline-1,3-dione (4d)**

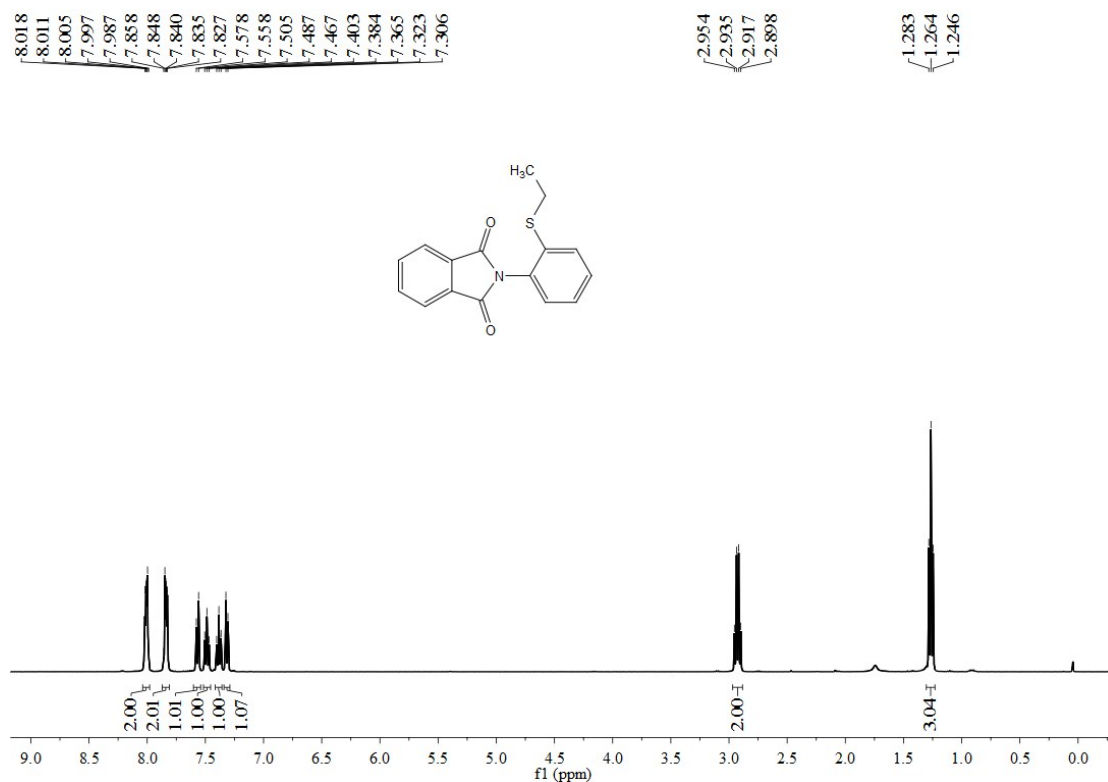

**<sup>1</sup>H NMR: 2-(2-(ethylthio)phenyl)isoindoline-1,3-dione (4e)**

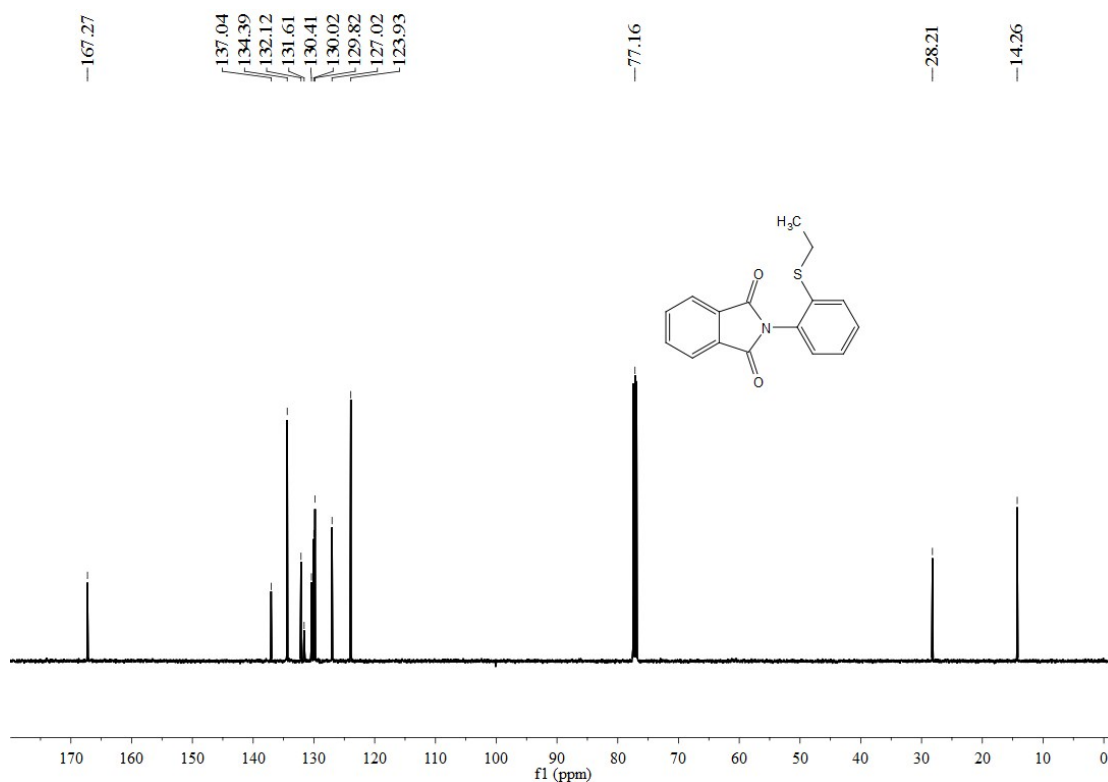

**<sup>13</sup>C NMR: 2-(2-(ethylthio)phenyl)isoindoline-1,3-dione (4e)**



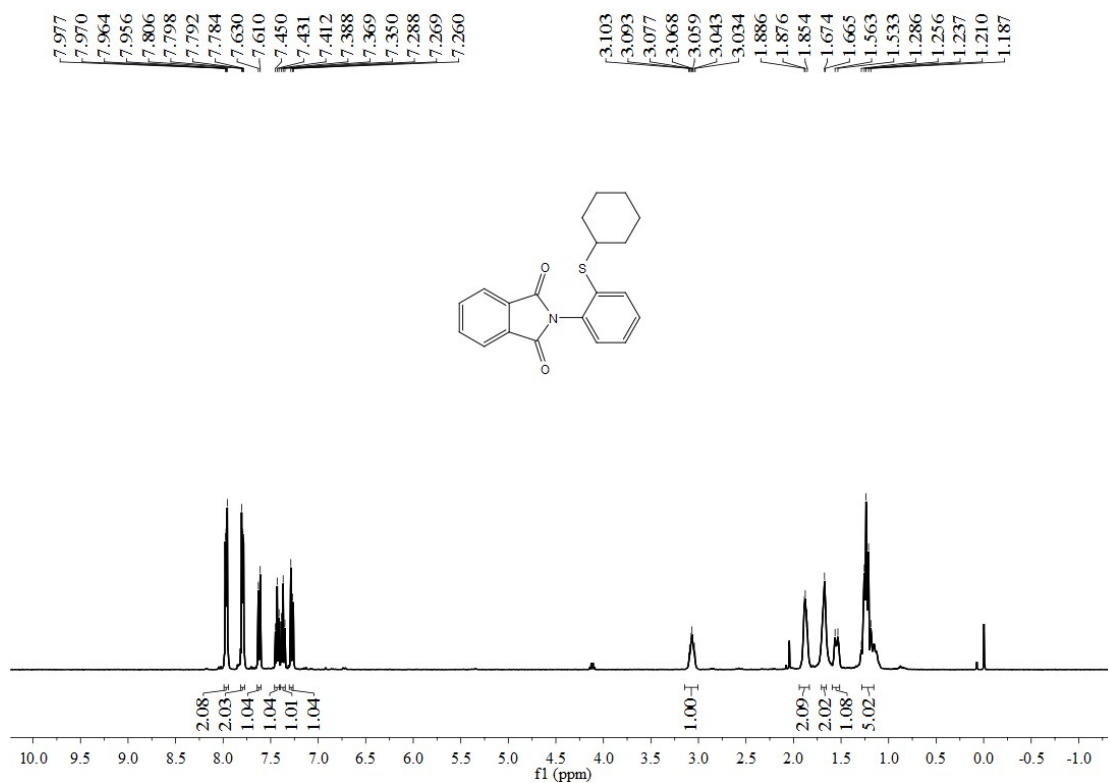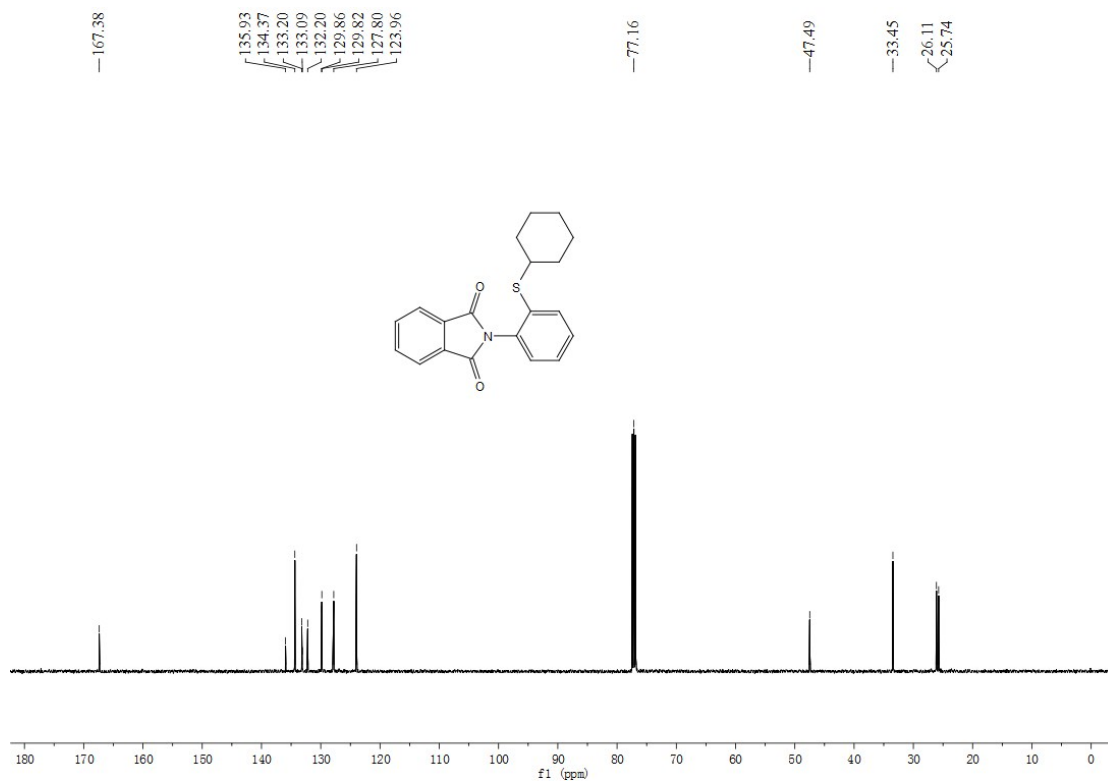

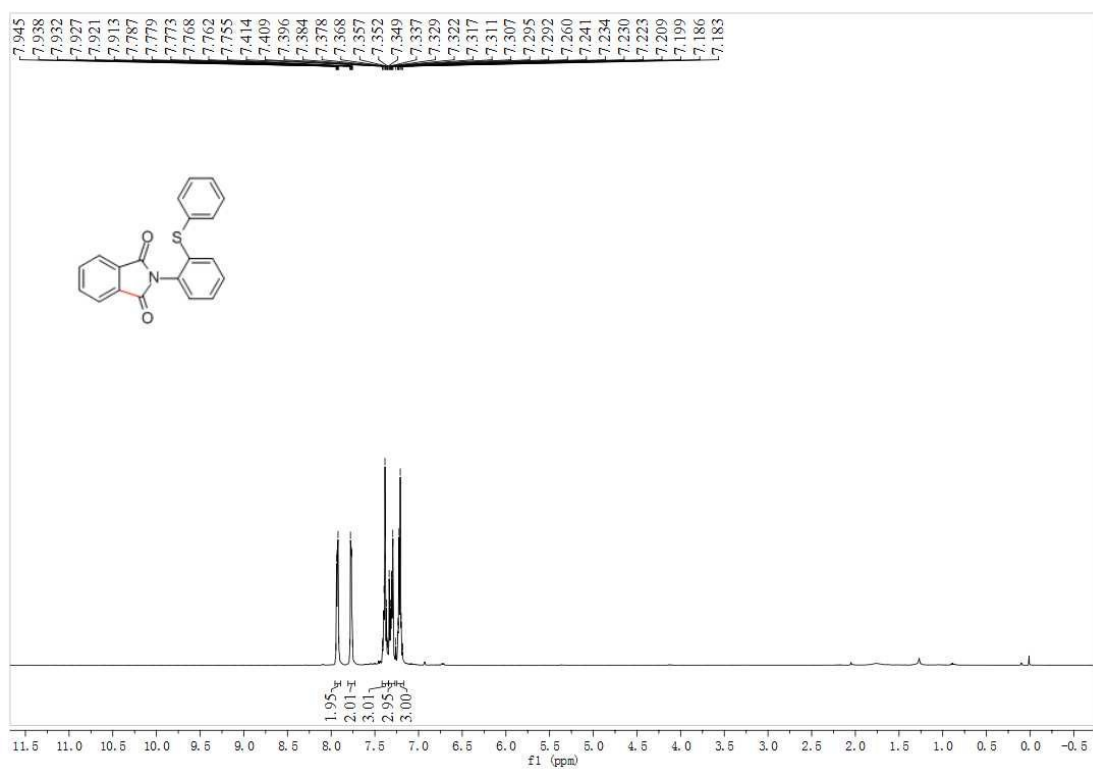

**<sup>1</sup>H NMR:2-(2-(phenylthio)phenyl)isoindoline-1,3-dione(4g)**

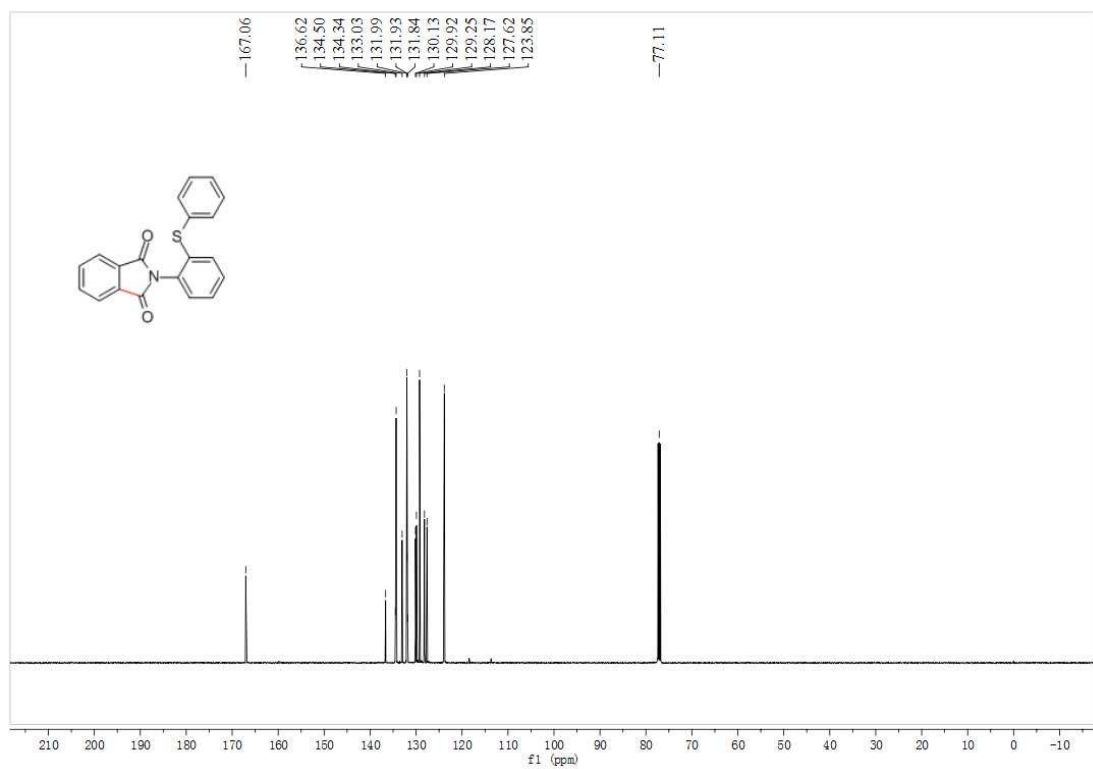

**<sup>13</sup>C NMR:2-(2-(phenylthio)phenyl)isoindoline-1,3-dione(4g)**

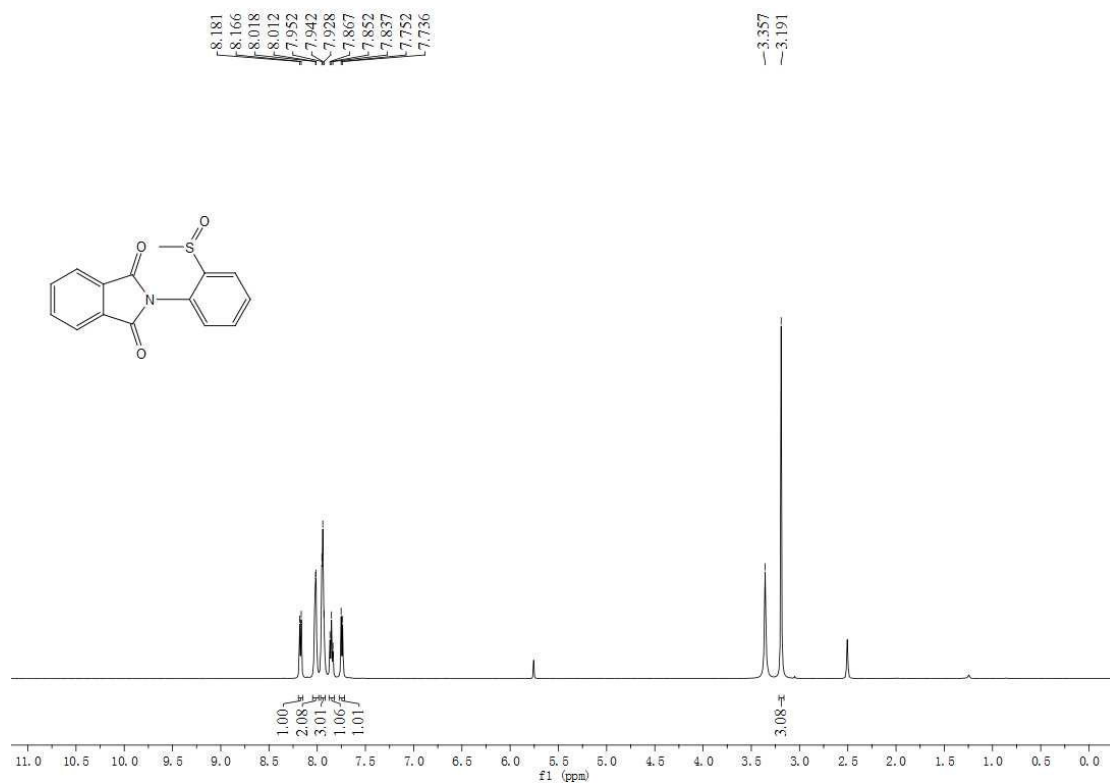

**<sup>1</sup>H NMR: 2-(2-(methylsulfinyl)phenyl)isoindoline-1,3-dione (11)**

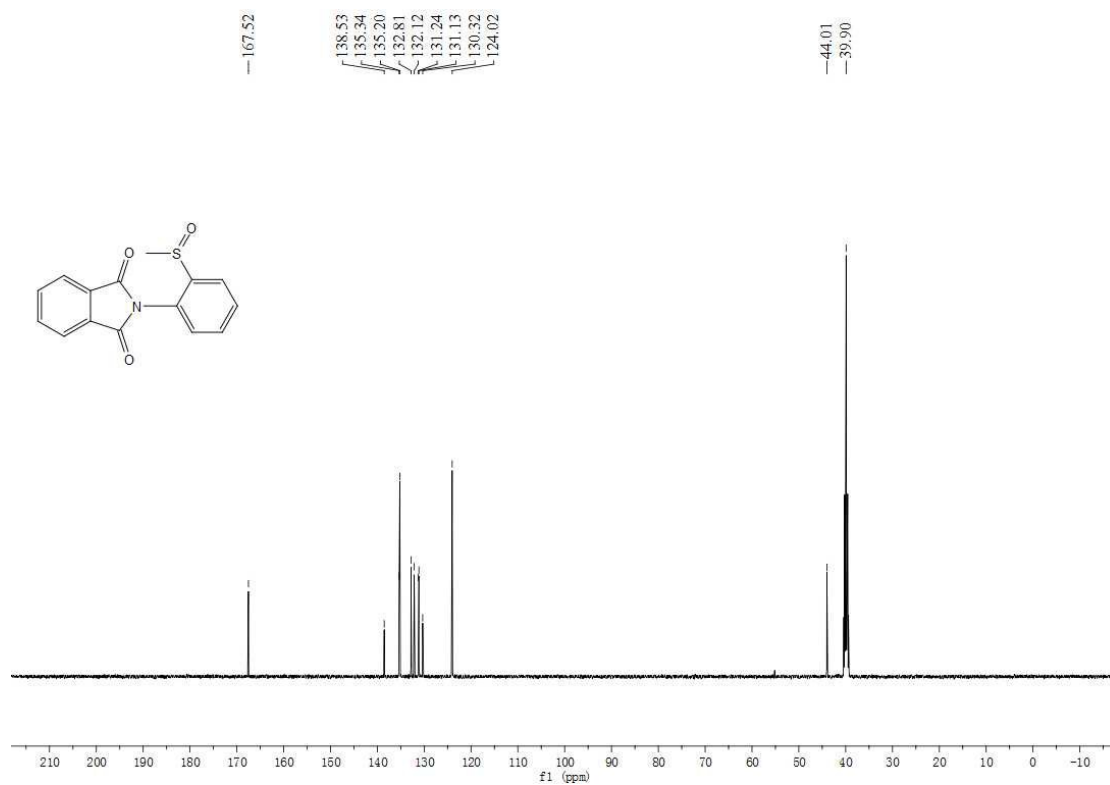

**<sup>13</sup>C NMR: 2-(2-(methylsulfinyl)phenyl)isoindoline-1,3-dione (11)**

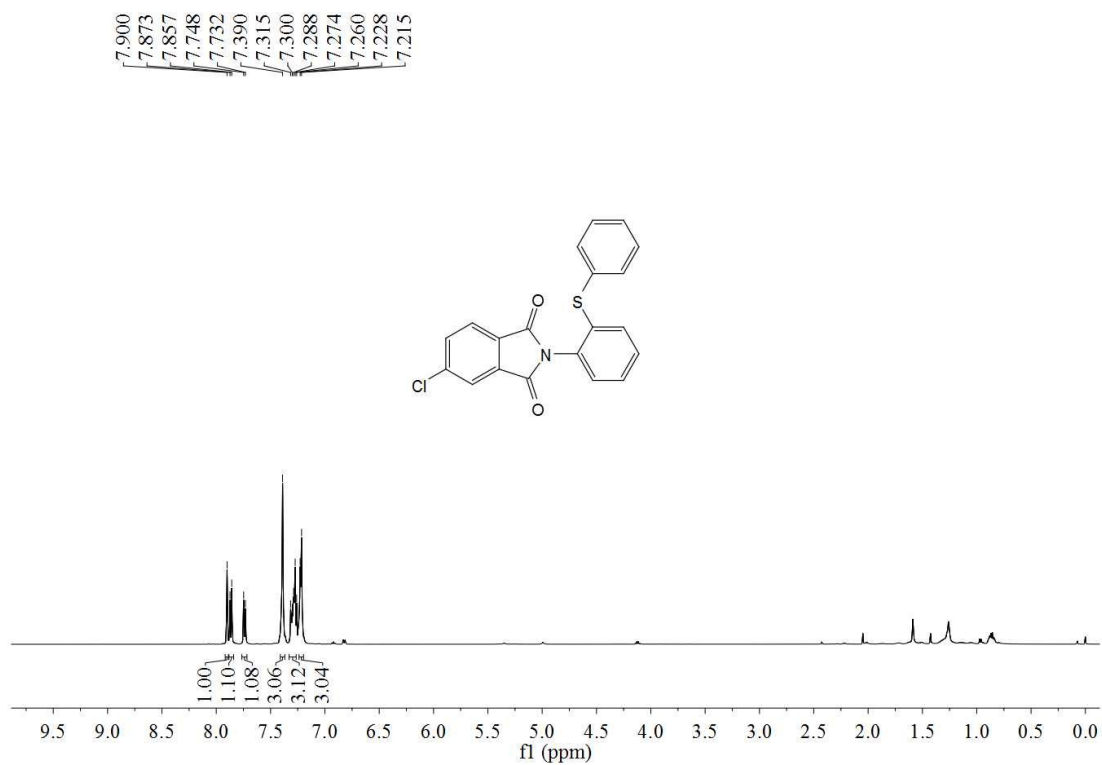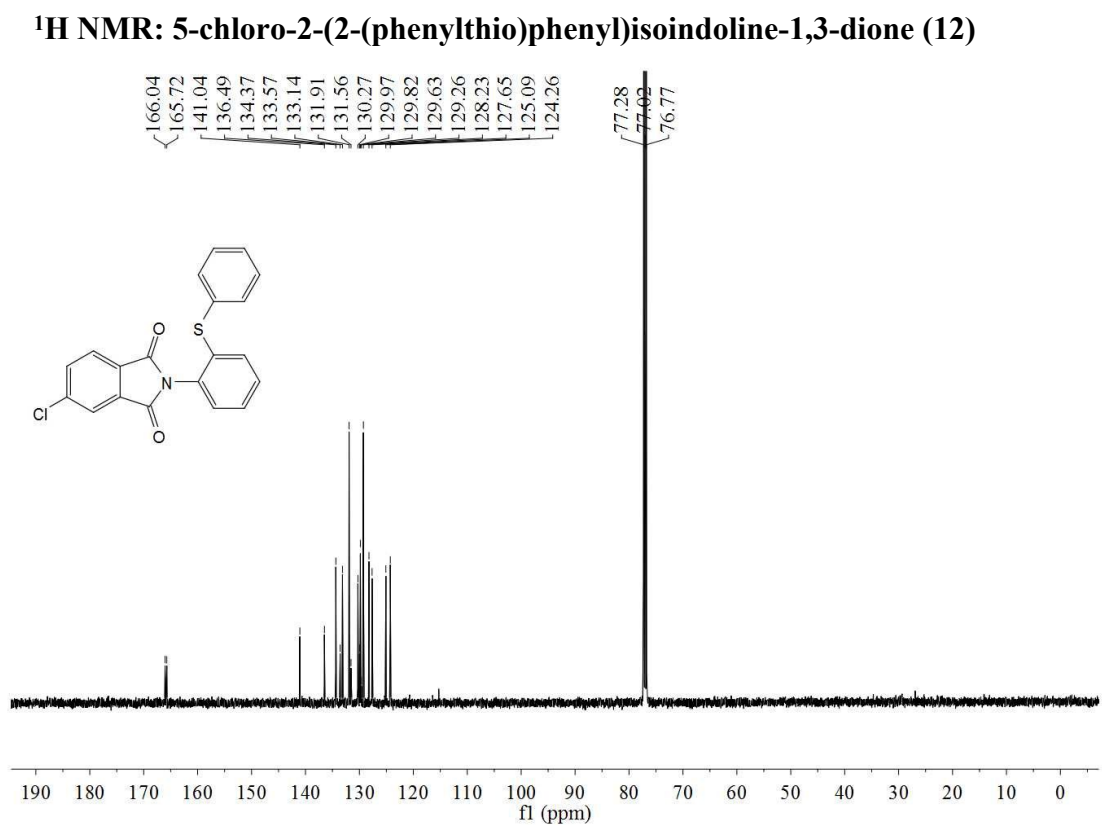

## 7. X-ray crystal structure of compound 2a

Supplementary crystallographic data was deposited at the Cambridge Crystallographic Data Centre (CCDC) under the numbers CCDC-1821829 (**2a**) and can be obtained free of charge from via [www.ccdc.cam.ac.uk/data\\_request.cif](http://www.ccdc.cam.ac.uk/data_request.cif).

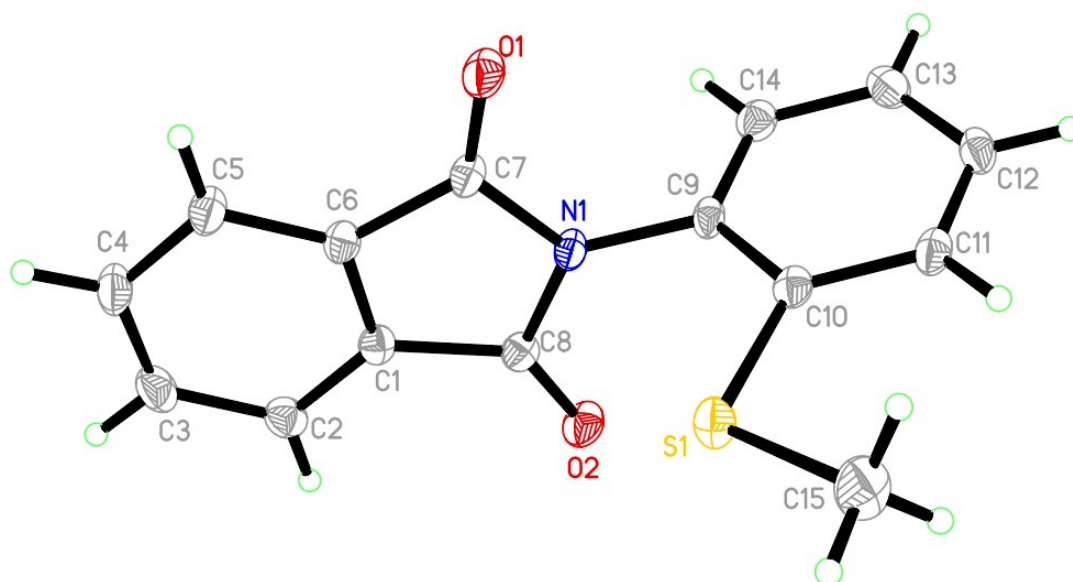

## 8. Data for Control Experiments

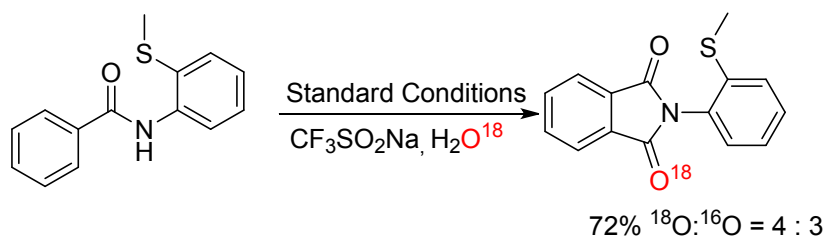

To a flame-dried Schlenk tube with a magnetic stirring bar was charged with **1a** (0.2 mmol),  $\text{CF}_3\text{SO}_2\text{Na}$  (0.54 mmol),  $\text{Pd}(\text{CF}_3\text{CO}_2)_2$  (13.3 mg, 0.4 mmol),  $\text{H}_2\text{O}^{18}$  (4.0 equiv, 16 mg, 0.8 mmol) in dry PhCl (2 mL) under air atmosphere. The reaction mixture was stirred at 120 °C until complete consumption of starting material as detected by TLC or GC–MS analysis. After the reaction was finished, the mixture was poured into ethyl acetate and evaporated under vacuum. The residue was purified by flash column chromatography (petroleum ether/ethyl acetate) to afford the desired products  $^{18}\text{O}$ -**2a**.

**O<sup>18</sup>-2a** HRMS (ESI):

Calcd for C<sub>15</sub>H<sub>11</sub>NOO<sup>18</sup>S Na<sup>+</sup> ([M + Na]<sup>+</sup>) 294.0445, Found: 294.0453.

**Generic Display Report (all)**

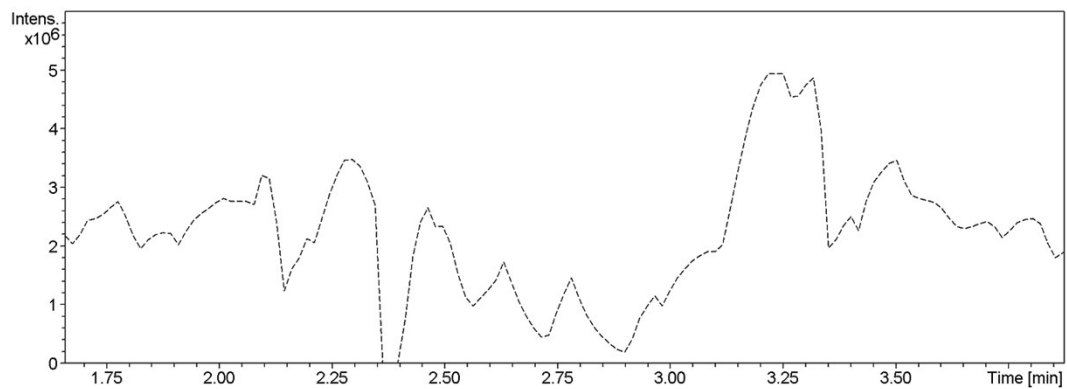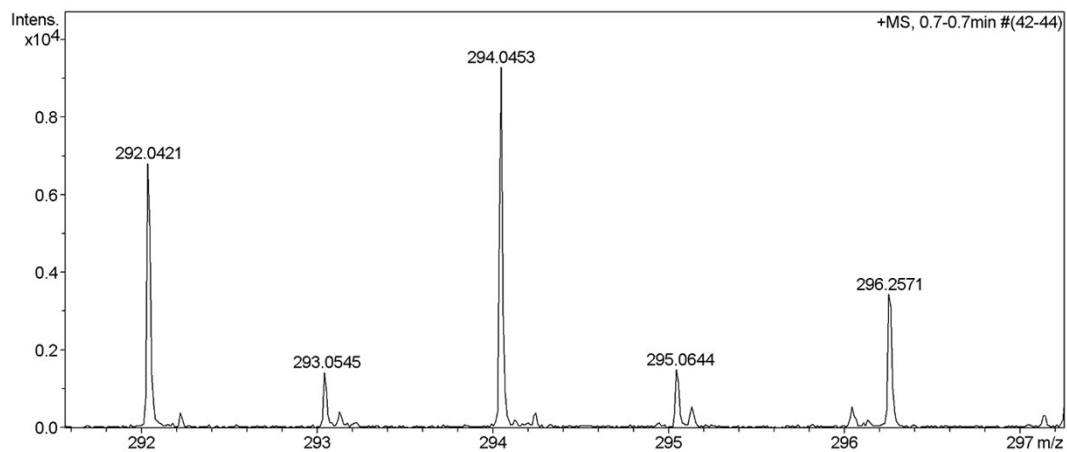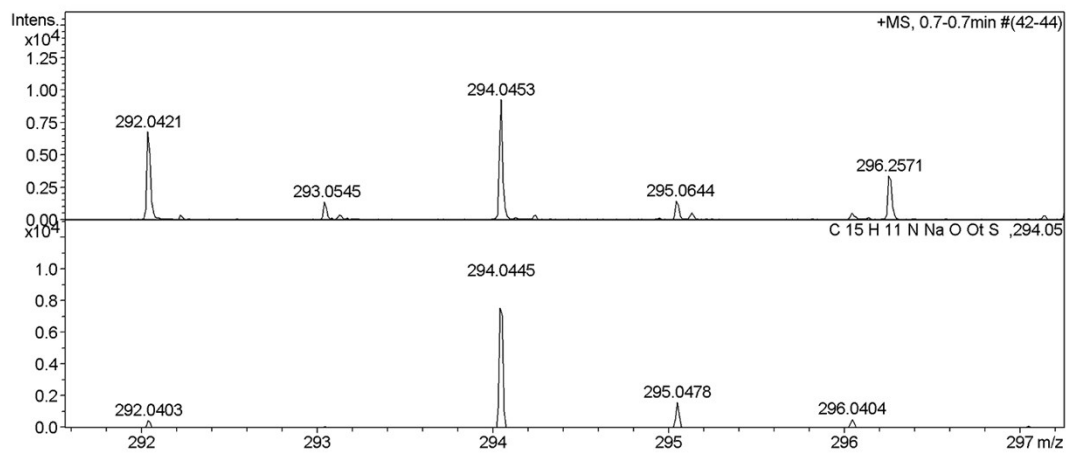

# O<sup>18</sup>-2a GC analysis

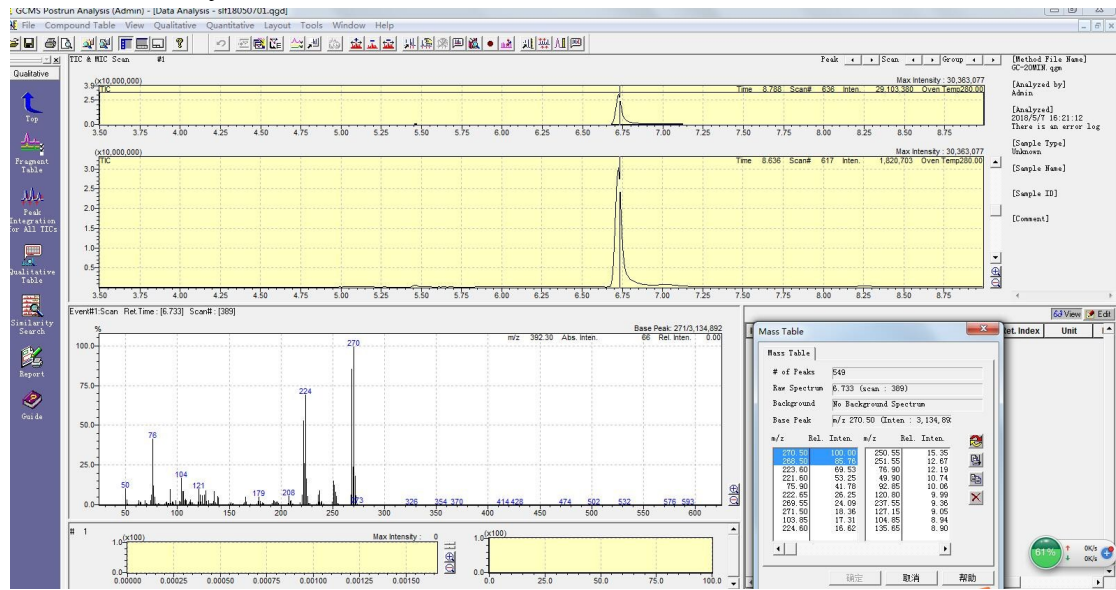

Supplement: c8ob01421c1.pdf [file c8ob01421c1.pdf]
